# Supplementary material for: High throughput screening of promising lead-free inorganic halide double perovskites via first-principles calculations
Source: Royal Society of Chemistry journal article supplement (doi:10.1039/d1cp04976c), 2022-01-01
Supplement: d1cp04976c1.pdf [file d1cp04976c1.pdf]

## Supporting Information

### High throughput screening of promising inorganic halide double perovskites via first-principles calculations

Zhengyang Gao<sup>a,b,c</sup>, Guangyang Mao<sup>a,b,c</sup>, Shengyi Chen<sup>a,b,c</sup>, Yang Bai<sup>a,b,c</sup>, Peng Gao<sup>a,b,c</sup>,  
Chongchong Wu<sup>h</sup>, Ian D. Gates<sup>h</sup>, Weijie Yang<sup>\*a,b,c</sup>, Xunlei Ding<sup>\*d,e</sup>, Jianxi Yao<sup>\*f,g</sup>

<sup>a</sup> Department of Power Engineering, North China Electric Power University, Baoding 071003, Hebei, China.

<sup>b</sup> Hebei Key Laboratory of Low Carbon and High Efficiency Power Generation Technology, North China Electric Power University, Baoding 071003, Hebei, China.

<sup>c</sup> Baoding Key Laboratory of Low Carbon and High Efficiency Power Generation Technology, North China Electric Power University, Baoding 071003, Hebei, China.

<sup>d</sup> School of Mathematics and Physics, North China Electric Power University, Beijing 102206, China.

<sup>e</sup> Institute of Clusters and Low Dimensional Nanomaterials, School of Mathematics and Physics, North China Electric Power University, Beijing, People's Republic of China

<sup>f</sup> State Key Laboratory of Alternate Electrical Power System With Renewable Energy Sources, North China Electric Power University, Beijing 102206, China.

<sup>g</sup> Beijing Key Laboratory of Energy Safety and Clean Utilization, North China Electric Power University, Beijing 102206, China.

<sup>h</sup> Department of Chemical and Petroleum Engineering, University of Calgary, T2N 1N4, Calgary, Alberta, Canada.

\* Corresponding Authors:

Weijie Yang (yangwj@ncepu.edu.cn)

Xunlei Ding (dingxl@ncepu.edu.cn)

Jianxi Yao (jianxiyao@ncepu.edu.cn)

## Table of contents

**Table S1.** Ionic radius.

**Table S2.** Ligand field stabilization energy of B site

**Figure S1.** Test of K-point.

**Figure S2 .** The energy of  $\text{Cs}_2\text{FeZnBr}_6$  arranged in  $\text{FeBr}_6$  (red) +  $\text{ZnBr}_6$  (green) patterns with different symmetry.

**Table S3.** Goldschmidt tolerance factor  $t$  and octahedral factor  $\mu$  of inorganic double perovskites.

**Table S4.** Goldschmidt tolerance factor range of inorganic double perovskites

**Table S5.** Double perovskite with minimum tolerance factor in unstable region

**Table S6.** Double perovskite with maximum tolerance factor in unstable region

**Table S7.** New tolerance factors  $\tau$  of the 14 predicted all-inorganic double perovskite materials.

**Table S8.** The band gaps for PBE functional.

**Table S9.** The band gaps for HSE functional.

**Figure S3.** HSE calculated band structures for (a)  $\text{Cs}_2\text{PbSnI}_6$ , (b)  $\text{Cs}_2\text{PbGeI}_6$  (c)  $\text{Cs}_2\text{MnPtF}_6$ , (d)  $\text{Cs}_2\text{PbSnBr}_6$ , (e)  $\text{Cs}_2\text{PbGeBr}_6$ , and (f)  $\text{Cs}_2\text{SnGeCl}_6$ .

**Figure S4.** HSE calculated projected density of states (PDOS) for (a)  $\text{Cs}_2\text{PbSnI}_6$ , (b)  $\text{Cs}_2\text{PbGeI}_6$  (c)  $\text{Cs}_2\text{MnPtF}_6$ , (d)  $\text{Cs}_2\text{PbSnBr}_6$ , (e)  $\text{Cs}_2\text{PbGeBr}_6$ , and (f)  $\text{Cs}_2\text{SnGeCl}_6$ .

**Table S10.** Band gaps of the 14 predicted all-inorganic double perovskite materials.

**Figure S5.** The X-ray diffraction evolution of cubic structure with the temperature of 800 K for  $\text{Cs}_2\text{PbSnI}_6$ ,  $\text{Cs}_2\text{PbGeI}_6$ ,  $\text{Cs}_2\text{PbSnBr}_6$ ,  $\text{Cs}_2\text{PbGeBr}_6$ ,  $\text{Cs}_2\text{SnGeCl}_6$ ,  $\text{Cs}_2\text{MnPtF}_6$ .

**Figure S6.** Calculated optical properties for  $\text{Cs}_2\text{CdTeF}_6$ ,  $\text{Cs}_2\text{MgMnI}_6$ ,  $\text{Cs}_2\text{PbSnCl}_6$ ,  $\text{Cs}_2\text{CdBeBr}_6$ ,  $\text{Cs}_2\text{ZnTeF}_6$ ,  $\text{Cs}_2\text{PbGeCl}_6$ ,  $\text{Cs}_2\text{CaZnI}_6$ ,  $\text{Cs}_2\text{FeTeF}_6$ . Absorption coefficient: (a) and (c). Joint density of states (JDOS): (b) and (d).

**Table S1.** Ionic radius

| Symbol | Ionic radius (pm) | Valence | Atomic number |
|--------|-------------------|---------|---------------|
| Cs     | 167               | +1      | 55            |
| F      | 133               | -1      | 9             |
| Cl     | 181               | -1      | 17            |
| Br     | 196               | -1      | 35            |
| I      | 220               | -1      | 53            |
| Pb     | 119               | +2      | 82            |
| Sn     | 122               | +2      | 50            |
| Ge     | 73                | +2      | 32            |
| Be     | 45                | +2      | 4             |
| Mg     | 72                | +2      | 12            |
| Ca     | 100               | +2      | 20            |
| Sr     | 118               | +2      | 38            |
| Ba     | 135               | +2      | 56            |
| Mn     | 80                | +2      | 25            |
| Fe     | 78                | +2      | 26            |
| Co     | 74.5              | +2      | 27            |
| Ni     | 69                | +2      | 28            |
| Cu     | 73                | +2      | 29            |
| Zn     | 74                | +2      | 30            |
| Pd     | 86                | +2      | 46            |
| Ir     | 90                | +2      | 77            |
| Pt     | 80                | +2      | 78            |
| Te     | 100               | +2      | 52            |
| Cd     | 95                | +2      | 48            |

**Table S2.** Ligand field stabilization energy of B site

| Ion              | <i>d</i> orbital electron number | LFSE |
|------------------|----------------------------------|------|
| Pb <sup>2+</sup> | 10                               | 0    |
| Sn <sup>2+</sup> | 10                               | 0    |
| Ge <sup>2+</sup> | 10                               | 0    |
| Be <sup>2+</sup> | 0                                | 0    |
| Mg <sup>2+</sup> | 0                                | 0    |
| Ca <sup>2+</sup> | 0                                | 0    |
| Sr <sup>2+</sup> | 10                               | 0    |
| Ba <sup>2+</sup> | 10                               | 0    |
| Mn <sup>2+</sup> | 5                                | 0    |
| Fe <sup>2+</sup> | 6                                | 0.4  |
| Co <sup>2+</sup> | 7                                | 0.8  |
| Ni <sup>2+</sup> | 8                                | 1.2  |
| Cu <sup>2+</sup> | 9                                | 0.6  |
| Zn <sup>2+</sup> | 10                               | 0    |
| Pd <sup>2+</sup> | 8                                | 1.2  |
| Ir <sup>2+</sup> | 7                                | 0.8  |
| Pt <sup>2+</sup> | 8                                | 1.2  |
| Te <sup>2+</sup> | 10                               | 0    |
| Cd <sup>2+</sup> | 10                               | 0    |

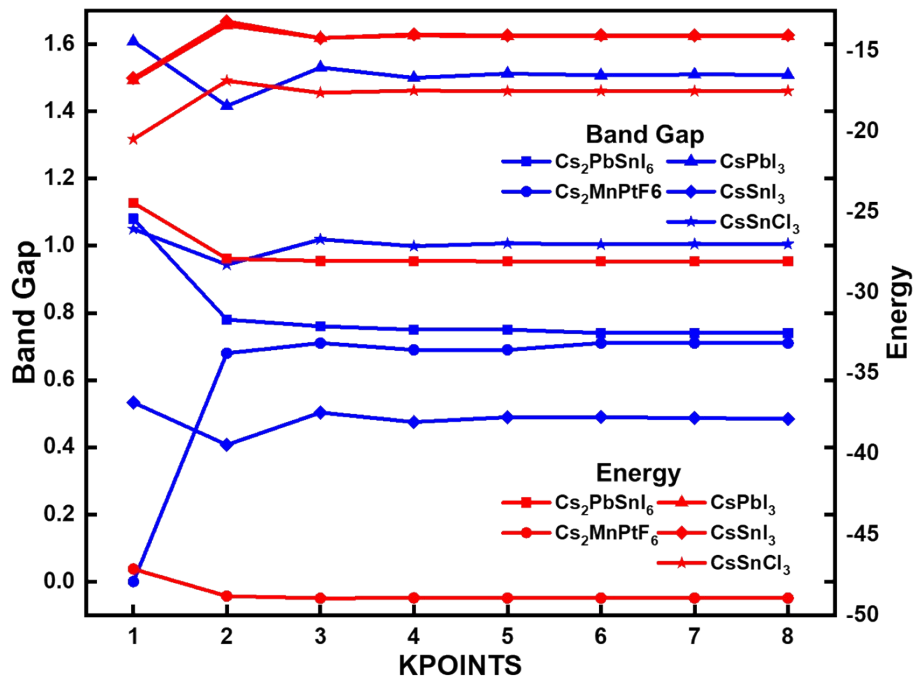

**Figure S1.** Test of K-point

Considering the band gap value and the convergence curve of energy comprehensively, we choose the K-point of  $6 \times 6 \times 6$ .

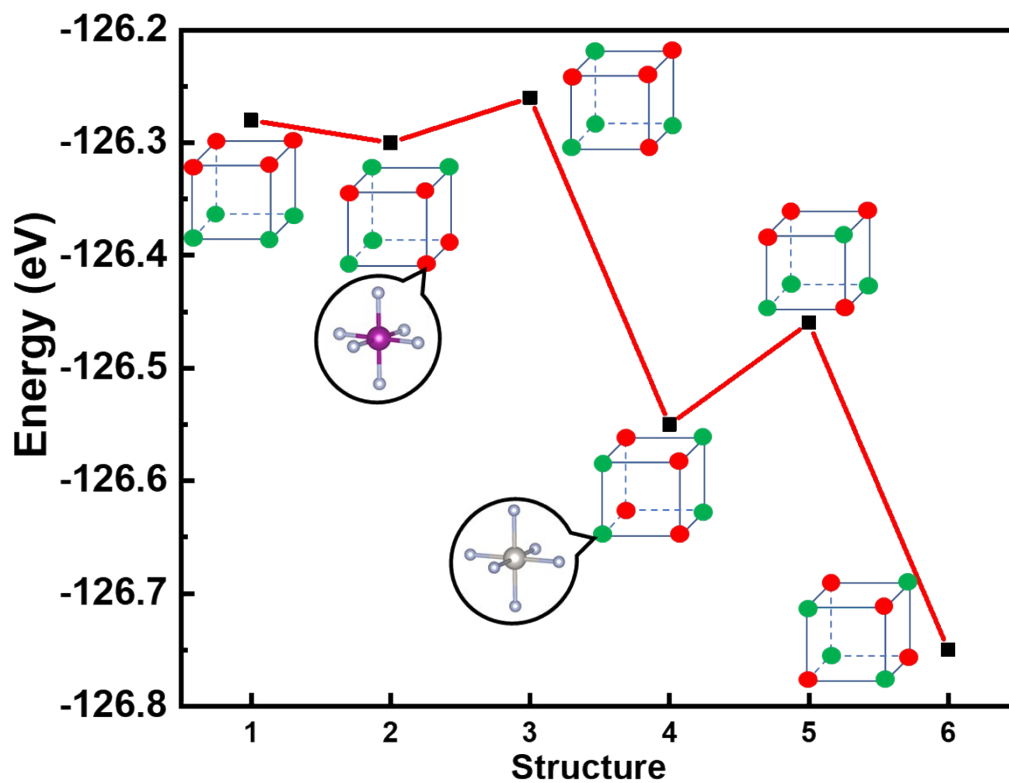

**Figure S2 .** The energy of  $\text{Cs}_2\text{FeZnBr}_6$  arranged in  $\text{FeBr}_6$  (red) +  $\text{ZnBr}_6$  (green) patterns with different symmetry.

**Table S3.** Goldschmidt tolerance factor  $t$  and octahedral factor  $u$  of inorganic double perovskites

| Material                           | $t$   | $u$   | Material                           | $t$   | $u$   | Material                           | $t$   | $u$   |
|------------------------------------|-------|-------|------------------------------------|-------|-------|------------------------------------|-------|-------|
| Cs <sub>2</sub> PbSnI <sub>6</sub> | 0.816 | 0.525 | Cs <sub>2</sub> SnCaF <sub>6</sub> | 0.888 | 0.797 | Cs <sub>2</sub> GeNiI <sub>6</sub> | 0.940 | 0.323 |
| Cs <sub>2</sub> PbSnF <sub>6</sub> | 0.854 | 0.868 | Cs <sub>2</sub> SnSrI <sub>6</sub> | 0.817 | 0.523 | Cs <sub>2</sub> GeNiF <sub>6</sub> | 1.040 | 0.534 |
| Cs <sub>2</sub> PbGeI <sub>6</sub> | 0.866 | 0.436 | Cs <sub>2</sub> SnSrF <sub>6</sub> | 0.855 | 0.865 | Cs <sub>2</sub> GeCuI <sub>6</sub> | 0.934 | 0.332 |
| Cs <sub>2</sub> PbGeF <sub>6</sub> | 0.926 | 0.722 | Cs <sub>2</sub> SnBaI <sub>6</sub> | 0.797 | 0.561 | Cs <sub>2</sub> GeCuF <sub>6</sub> | 1.030 | 0.549 |
| Cs <sub>2</sub> PbBeI <sub>6</sub> | 0.906 | 0.373 | Cs <sub>2</sub> SnMnI <sub>6</sub> | 0.884 | 0.407 | Cs <sub>2</sub> GeZnI <sub>6</sub> | 0.932 | 0.334 |
| Cs <sub>2</sub> PbBeF <sub>6</sub> | 0.987 | 0.617 | Cs <sub>2</sub> SnMnF <sub>6</sub> | 0.953 | 0.673 | Cs <sub>2</sub> GeZnF <sub>6</sub> | 1.027 | 0.553 |
| Cs <sub>2</sub> PbMgI <sub>6</sub> | 0.867 | 0.434 | Cs <sub>2</sub> SnFeI <sub>6</sub> | 0.869 | 0.432 | Cs <sub>2</sub> GePdI <sub>6</sub> | 0.914 | 0.361 |
| Cs <sub>2</sub> PbMgF <sub>6</sub> | 0.928 | 0.718 | Cs <sub>2</sub> SnFeF <sub>6</sub> | 0.930 | 0.714 | Cs <sub>2</sub> GePdF <sub>6</sub> | 0.998 | 0.598 |
| Cs <sub>2</sub> PbCaI <sub>6</sub> | 0.831 | 0.498 | Cs <sub>2</sub> SnCoI <sub>6</sub> | 0.874 | 0.424 | Cs <sub>2</sub> GeIrI <sub>6</sub> | 0.908 | 0.370 |
| Cs <sub>2</sub> PbCaF <sub>6</sub> | 0.875 | 0.823 | Cs <sub>2</sub> SnCoF <sub>6</sub> | 0.938 | 0.701 | Cs <sub>2</sub> GeIrF <sub>6</sub> | 0.989 | 0.613 |
| Cs <sub>2</sub> PbSrI <sub>6</sub> | 0.808 | 0.539 | Cs <sub>2</sub> SnNiI <sub>6</sub> | 0.881 | 0.411 | Cs <sub>2</sub> GePtI <sub>6</sub> | 0.914 | 0.361 |
| Cs <sub>2</sub> PbSrF <sub>6</sub> | 0.843 | 0.891 | Cs <sub>2</sub> SnNiF <sub>6</sub> | 0.949 | 0.680 | Cs <sub>2</sub> GePtF <sub>6</sub> | 0.998 | 0.598 |
| Cs <sub>2</sub> PbBaI <sub>6</sub> | 0.789 | 0.577 | Cs <sub>2</sub> SnCuI <sub>6</sub> | 0.876 | 0.42  | Cs <sub>2</sub> GeTeI <sub>6</sub> | 0.893 | 0.393 |
| Cs <sub>2</sub> PbMnI <sub>6</sub> | 0.874 | 0.423 | Cs <sub>2</sub> SnCuF <sub>6</sub> | 0.941 | 0.695 | Cs <sub>2</sub> GeTeF <sub>6</sub> | 0.966 | 0.650 |
| Cs <sub>2</sub> PbMnF <sub>6</sub> | 0.939 | 0.699 | Cs <sub>2</sub> SnZnI <sub>6</sub> | 0.874 | 0.423 | Cs <sub>2</sub> BeMgI <sub>6</sub> | 0.983 | 0.266 |
| Cs <sub>2</sub> PbFeI <sub>6</sub> | 0.859 | 0.448 | Cs <sub>2</sub> SnZnF <sub>6</sub> | 0.939 | 0.699 | Cs <sub>2</sub> BeMgF <sub>6</sub> | 1.108 | 0.440 |
| Cs <sub>2</sub> PbFeF <sub>6</sub> | 0.916 | 0.741 | Cs <sub>2</sub> SnPdI <sub>6</sub> | 0.858 | 0.450 | Cs <sub>2</sub> BeCaI <sub>6</sub> | 0.936 | 0.330 |
| Cs <sub>2</sub> PbCoI <sub>6</sub> | 0.864 | 0.44  | Cs <sub>2</sub> SnPdF <sub>6</sub> | 0.914 | 0.744 | Cs <sub>2</sub> BeCaF <sub>6</sub> | 1.032 | 0.545 |
| Cs <sub>2</sub> PbCoF <sub>6</sub> | 0.923 | 0.727 | Cs <sub>2</sub> SnIrI <sub>6</sub> | 0.852 | 0.459 | Cs <sub>2</sub> BeSrI <sub>6</sub> | 0.908 | 0.370 |
| Cs <sub>2</sub> PbNiI <sub>6</sub> | 0.871 | 0.427 | Cs <sub>2</sub> SnIrF <sub>6</sub> | 0.907 | 0.759 | Cs <sub>2</sub> BeSrF <sub>6</sub> | 0.989 | 0.613 |
| Cs <sub>2</sub> PbNiF <sub>6</sub> | 0.935 | 0.707 | Cs <sub>2</sub> SnPtI <sub>6</sub> | 0.858 | 0.450 | Cs <sub>2</sub> BeBaI <sub>6</sub> | 0.883 | 0.409 |
| Cs <sub>2</sub> PbCuI <sub>6</sub> | 0.866 | 0.436 | Cs <sub>2</sub> SnPtF <sub>6</sub> | 0.914 | 0.744 | Cs <sub>2</sub> BeBaF <sub>6</sub> | 0.951 | 0.677 |
| Cs <sub>2</sub> PbCuF <sub>6</sub> | 0.926 | 0.722 | Cs <sub>2</sub> SnTeI <sub>6</sub> | 0.839 | 0.482 | Cs <sub>2</sub> BeMnI <sub>6</sub> | 0.991 | 0.255 |
| Cs <sub>2</sub> PbZnI <sub>6</sub> | 0.865 | 0.439 | Cs <sub>2</sub> SnTeF <sub>6</sub> | 0.888 | 0.797 | Cs <sub>2</sub> BeMnF <sub>6</sub> | 1.122 | 0.421 |
| Cs <sub>2</sub> PbZnF <sub>6</sub> | 0.924 | 0.726 | Cs <sub>2</sub> GeBeI <sub>6</sub> | 0.981 | 0.268 | Cs <sub>2</sub> BeFeI <sub>6</sub> | 0.972 | 0.280 |
| Cs <sub>2</sub> PbPdI <sub>6</sub> | 0.849 | 0.466 | Cs <sub>2</sub> GeBeF <sub>6</sub> | 1.105 | 0.444 | Cs <sub>2</sub> BeFeF <sub>6</sub> | 1.091 | 0.462 |
| Cs <sub>2</sub> PbPdF <sub>6</sub> | 0.901 | 0.771 | Cs <sub>2</sub> GeMgI <sub>6</sub> | 0.936 | 0.330 | Cs <sub>2</sub> BeCoI <sub>6</sub> | 0.978 | 0.272 |
| Cs <sub>2</sub> PbIrI <sub>6</sub> | 0.843 | 0.475 | Cs <sub>2</sub> GeMgF <sub>6</sub> | 1.032 | 0.545 | Cs <sub>2</sub> BeCoF <sub>6</sub> | 1.101 | 0.449 |
| Cs <sub>2</sub> PbIrF <sub>6</sub> | 0.893 | 0.786 | Cs <sub>2</sub> GeCaI <sub>6</sub> | 0.893 | 0.393 | Cs <sub>2</sub> BeNiI <sub>6</sub> | 0.988 | 0.259 |
| Cs <sub>2</sub> PbPtI <sub>6</sub> | 0.849 | 0.466 | Cs <sub>2</sub> GeCaF <sub>6</sub> | 0.966 | 0.650 | Cs <sub>2</sub> BeNiF <sub>6</sub> | 1.116 | 0.429 |
| Cs <sub>2</sub> PbPtF <sub>6</sub> | 0.901 | 0.771 | Cs <sub>2</sub> GeSrI <sub>6</sub> | 0.867 | 0.434 | Cs <sub>2</sub> BeCuI <sub>6</sub> | 0.981 | 0.268 |
| Cs <sub>2</sub> PbTeI <sub>6</sub> | 0.831 | 0.498 | Cs <sub>2</sub> GeSrF <sub>6</sub> | 0.928 | 0.718 | Cs <sub>2</sub> BeCuF <sub>6</sub> | 1.105 | 0.444 |
| Cs <sub>2</sub> PbTeF <sub>6</sub> | 0.875 | 0.823 | Cs <sub>2</sub> GeBaI <sub>6</sub> | 0.845 | 0.473 | Cs <sub>2</sub> BeZnI <sub>6</sub> | 0.979 | 0.270 |
| Cs <sub>2</sub> SnGeI <sub>6</sub> | 0.876 | 0.42  | Cs <sub>2</sub> GeBaF <sub>6</sub> | 0.895 | 0.782 | Cs <sub>2</sub> BeZnF <sub>6</sub> | 1.102 | 0.447 |
| Cs <sub>2</sub> SnGeF <sub>6</sub> | 0.941 | 0.695 | Cs <sub>2</sub> GeMnI <sub>6</sub> | 0.944 | 0.318 | Cs <sub>2</sub> BePdI <sub>6</sub> | 0.958 | 0.298 |
| Cs <sub>2</sub> SnBeI <sub>6</sub> | 0.917 | 0.357 | Cs <sub>2</sub> GeMnF <sub>6</sub> | 1.045 | 0.526 | Cs <sub>2</sub> BePdF <sub>6</sub> | 1.069 | 0.492 |
| Cs <sub>2</sub> SnBeF <sub>6</sub> | 1.003 | 0.590 | Cs <sub>2</sub> GeFeI <sub>6</sub> | 0.926 | 0.343 | Cs <sub>2</sub> BeIrI <sub>6</sub> | 0.952 | 0.307 |
| Cs <sub>2</sub> SnMgI <sub>6</sub> | 0.877 | 0.418 | Cs <sub>2</sub> GeFeF <sub>6</sub> | 1.017 | 0.568 | Cs <sub>2</sub> BeIrF <sub>6</sub> | 1.058 | 0.508 |
| Cs <sub>2</sub> SnMgF <sub>6</sub> | 0.943 | 0.692 | Cs <sub>2</sub> GeCoI <sub>6</sub> | 0.932 | 0.335 | Cs <sub>2</sub> BePtI <sub>6</sub> | 0.958 | 0.298 |
| Cs <sub>2</sub> SnCaI <sub>6</sub> | 0.839 | 0.482 | Cs <sub>2</sub> GeCoF <sub>6</sub> | 1.026 | 0.555 | Cs <sub>2</sub> BePtF <sub>6</sub> | 1.069 | 0.492 |

| Material                           | t     | u     | Material                           | t     | u     | Material                           | t     | u     |
|------------------------------------|-------|-------|------------------------------------|-------|-------|------------------------------------|-------|-------|
| Cs <sub>2</sub> BeTeI <sub>6</sub> | 0.936 | 0.33  | Cs <sub>2</sub> CaCuI <sub>6</sub> | 0.893 | 0.393 | Cs <sub>2</sub> BaNiF <sub>6</sub> | 0.903 | 0.767 |
| Cs <sub>2</sub> BeTeF <sub>6</sub> | 1.032 | 0.545 | Cs <sub>2</sub> CaCuF <sub>6</sub> | 0.966 | 0.650 | Cs <sub>2</sub> BaCuI <sub>6</sub> | 0.845 | 0.473 |
| Cs <sub>2</sub> MgCaI <sub>6</sub> | 0.894 | 0.391 | Cs <sub>2</sub> CaZnI <sub>6</sub> | 0.891 | 0.395 | Cs <sub>2</sub> BaCuF <sub>6</sub> | 0.895 | 0.782 |
| Cs <sub>2</sub> MgCaF <sub>6</sub> | 0.969 | 0.647 | Cs <sub>2</sub> CaZnF <sub>6</sub> | 0.964 | 0.654 | Cs <sub>2</sub> BaZnI <sub>6</sub> | 0.843 | 0.475 |
| Cs <sub>2</sub> MgSrI <sub>6</sub> | 0.869 | 0.432 | Cs <sub>2</sub> CaPdI <sub>6</sub> | 0.874 | 0.423 | Cs <sub>2</sub> BaZnF <sub>6</sub> | 0.893 | 0.786 |
| Cs <sub>2</sub> MgSrF <sub>6</sub> | 0.930 | 0.714 | Cs <sub>2</sub> CaPdF <sub>6</sub> | 0.939 | 0.699 | Cs <sub>2</sub> BaPdI <sub>6</sub> | 0.828 | 0.502 |
| Cs <sub>2</sub> MgBaI <sub>6</sub> | 0.846 | 0.470 | Cs <sub>2</sub> CaIrI <sub>6</sub> | 0.869 | 0.432 | Cs <sub>2</sub> BaPdF <sub>6</sub> | 0.871 | 0.831 |
| Cs <sub>2</sub> MgBaF <sub>6</sub> | 0.897 | 0.778 | Cs <sub>2</sub> CaIrF <sub>6</sub> | 0.930 | 0.714 | Cs <sub>2</sub> BaIrI <sub>6</sub> | 0.823 | 0.511 |
| Cs <sub>2</sub> MgMnI <sub>6</sub> | 0.945 | 0.316 | Cs <sub>2</sub> CaPtI <sub>6</sub> | 0.874 | 0.423 | Cs <sub>2</sub> BaIrF <sub>6</sub> | 0.864 | 0.846 |
| Cs <sub>2</sub> MgMnF <sub>6</sub> | 1.048 | 0.523 | Cs <sub>2</sub> CaPtF <sub>6</sub> | 0.939 | 0.699 | Cs <sub>2</sub> BaPtI <sub>6</sub> | 0.828 | 0.502 |
| Cs <sub>2</sub> MgFeI <sub>6</sub> | 0.928 | 0.341 | Cs <sub>2</sub> CaTeI <sub>6</sub> | 0.855 | 0.455 | Cs <sub>2</sub> BaPtF <sub>6</sub> | 0.871 | 0.831 |
| Cs <sub>2</sub> MgFeF <sub>6</sub> | 1.020 | 0.564 | Cs <sub>2</sub> CaTeF <sub>6</sub> | 0.910 | 0.752 | Cs <sub>2</sub> BaTeI <sub>6</sub> | 0.811 | 0.534 |
| Cs <sub>2</sub> MgCoI <sub>6</sub> | 0.933 | 0.333 | Cs <sub>2</sub> SrBaI <sub>6</sub> | 0.790 | 0.575 | Cs <sub>2</sub> BaTeF <sub>6</sub> | 0.847 | 0.883 |
| Cs <sub>2</sub> MgCoF <sub>6</sub> | 1.029 | 0.551 | Cs <sub>2</sub> SrMnI <sub>6</sub> | 0.876 | 0.420 | Cs <sub>2</sub> MnFeI <sub>6</sub> | 0.936 | 0.330 |
| Cs <sub>2</sub> MgNiI <sub>6</sub> | 0.942 | 0.320 | Cs <sub>2</sub> SrMnF <sub>6</sub> | 0.941 | 0.695 | Cs <sub>2</sub> MnFeF <sub>6</sub> | 1.032 | 0.545 |
| Cs <sub>2</sub> MgNiF <sub>6</sub> | 1.042 | 0.530 | Cs <sub>2</sub> SrFeI <sub>6</sub> | 0.861 | 0.445 | Cs <sub>2</sub> MnCoI <sub>6</sub> | 0.941 | 0.322 |
| Cs <sub>2</sub> MgCuI <sub>6</sub> | 0.936 | 0.330 | Cs <sub>2</sub> SrFeF <sub>6</sub> | 0.918 | 0.737 | Cs <sub>2</sub> MnCoF <sub>6</sub> | 1.041 | 0.532 |
| Cs <sub>2</sub> MgCuF <sub>6</sub> | 1.032 | 0.545 | Cs <sub>2</sub> SrCoI <sub>6</sub> | 0.865 | 0.438 | Cs <sub>2</sub> MnNiI <sub>6</sub> | 0.95  | 0.309 |
| Cs <sub>2</sub> MgZnI <sub>6</sub> | 0.934 | 0.332 | Cs <sub>2</sub> SrCoF <sub>6</sub> | 0.925 | 0.724 | Cs <sub>2</sub> MnNiF <sub>6</sub> | 1.055 | 0.511 |
| Cs <sub>2</sub> MgZnF <sub>6</sub> | 1.030 | 0.549 | Cs <sub>2</sub> SrNiI <sub>6</sub> | 0.873 | 0.425 | Cs <sub>2</sub> MnCuI <sub>6</sub> | 0.944 | 0.318 |
| Cs <sub>2</sub> MgPdI <sub>6</sub> | 0.915 | 0.359 | Cs <sub>2</sub> SrNiF <sub>6</sub> | 0.937 | 0.703 | Cs <sub>2</sub> MnCuF <sub>6</sub> | 1.045 | 0.526 |
| Cs <sub>2</sub> MgPdF <sub>6</sub> | 1.001 | 0.594 | Cs <sub>2</sub> SrCuI <sub>6</sub> | 0.867 | 0.434 | Cs <sub>2</sub> MnZnI <sub>6</sub> | 0.942 | 0.320 |
| Cs <sub>2</sub> MgIrI <sub>6</sub> | 0.909 | 0.368 | Cs <sub>2</sub> SrCuF <sub>6</sub> | 0.928 | 0.718 | Cs <sub>2</sub> MnZnF <sub>6</sub> | 1.042 | 0.530 |
| Cs <sub>2</sub> MgIrF <sub>6</sub> | 0.991 | 0.609 | Cs <sub>2</sub> SrZnI <sub>6</sub> | 0.866 | 0.436 | Cs <sub>2</sub> MnPdI <sub>6</sub> | 0.923 | 0.348 |
| Cs <sub>2</sub> MgPtI <sub>6</sub> | 0.915 | 0.359 | Cs <sub>2</sub> SrZnF <sub>6</sub> | 0.926 | 0.722 | Cs <sub>2</sub> MnPdF <sub>6</sub> | 1.013 | 0.575 |
| Cs <sub>2</sub> MgPtF <sub>6</sub> | 1.001 | 0.594 | Cs <sub>2</sub> SrPdI <sub>6</sub> | 0.850 | 0.464 | Cs <sub>2</sub> MnIrI <sub>6</sub> | 0.917 | 0.357 |
| Cs <sub>2</sub> MgTeI <sub>6</sub> | 0.894 | 0.391 | Cs <sub>2</sub> SrPdF <sub>6</sub> | 0.903 | 0.767 | Cs <sub>2</sub> MnIrF <sub>6</sub> | 1.003 | 0.590 |
| Cs <sub>2</sub> MgTeF <sub>6</sub> | 0.969 | 0.647 | Cs <sub>2</sub> SrIrI <sub>6</sub> | 0.845 | 0.473 | Cs <sub>2</sub> MnPtI <sub>6</sub> | 0.923 | 0.348 |
| Cs <sub>2</sub> CaSrI <sub>6</sub> | 0.832 | 0.495 | Cs <sub>2</sub> SrIrF <sub>6</sub> | 0.895 | 0.782 | Cs <sub>2</sub> MnPtF <sub>6</sub> | 1.013 | 0.575 |
| Cs <sub>2</sub> CaSrF <sub>6</sub> | 0.877 | 0.820 | Cs <sub>2</sub> SrPtI <sub>6</sub> | 0.850 | 0.464 | Cs <sub>2</sub> MnTeI <sub>6</sub> | 0.902 | 0.380 |
| Cs <sub>2</sub> CaBaI <sub>6</sub> | 0.811 | 0.534 | Cs <sub>2</sub> SrPtF <sub>6</sub> | 0.903 | 0.767 | Cs <sub>2</sub> MnTeF <sub>6</sub> | 0.980 | 0.628 |
| Cs <sub>2</sub> CaBaF <sub>6</sub> | 0.847 | 0.883 | Cs <sub>2</sub> SrTeI <sub>6</sub> | 0.832 | 0.495 | Cs <sub>2</sub> FeCoI <sub>6</sub> | 0.924 | 0.347 |
| Cs <sub>2</sub> CaMnI <sub>6</sub> | 0.902 | 0.380 | Cs <sub>2</sub> SrTeF <sub>6</sub> | 0.877 | 0.82  | Cs <sub>2</sub> FeCoF <sub>6</sub> | 1.014 | 0.573 |
| Cs <sub>2</sub> CaMnF <sub>6</sub> | 0.980 | 0.628 | Cs <sub>2</sub> BaMnI <sub>6</sub> | 0.852 | 0.459 | Cs <sub>2</sub> FeNiI <sub>6</sub> | 0.932 | 0.334 |
| Cs <sub>2</sub> CaFeI <sub>6</sub> | 0.886 | 0.405 | Cs <sub>2</sub> BaMnF <sub>6</sub> | 0.907 | 0.759 | Cs <sub>2</sub> FeNiF <sub>6</sub> | 1.027 | 0.553 |
| Cs <sub>2</sub> CaFeF <sub>6</sub> | 0.956 | 0.669 | Cs <sub>2</sub> BaFeI <sub>6</sub> | 0.838 | 0.484 | Cs <sub>2</sub> FeCuI <sub>6</sub> | 0.926 | 0.343 |
| Cs <sub>2</sub> CaCoI <sub>6</sub> | 0.891 | 0.397 | Cs <sub>2</sub> BaFeF <sub>6</sub> | 0.886 | 0.801 | Cs <sub>2</sub> FeCuF <sub>6</sub> | 1.017 | 0.568 |
| Cs <sub>2</sub> CaCoF <sub>6</sub> | 0.963 | 0.656 | Cs <sub>2</sub> BaCoI <sub>6</sub> | 0.843 | 0.476 | Cs <sub>2</sub> FeZnI <sub>6</sub> | 0.924 | 0.345 |
| Cs <sub>2</sub> CaNiI <sub>6</sub> | 0.899 | 0.384 | Cs <sub>2</sub> BaCoF <sub>6</sub> | 0.892 | 0.788 | Cs <sub>2</sub> FeZnF <sub>6</sub> | 1.015 | 0.571 |
| Cs <sub>2</sub> CaNiF <sub>6</sub> | 0.975 | 0.635 | Cs <sub>2</sub> BaNiI <sub>6</sub> | 0.850 | 0.464 | Cs <sub>2</sub> FePdI <sub>6</sub> | 0.906 | 0.373 |



| Material                           | t     | u     | Material                           | t     | u      | Material                            | t     | u     |
|------------------------------------|-------|-------|------------------------------------|-------|--------|-------------------------------------|-------|-------|
| Cs <sub>2</sub> FePdF <sub>6</sub> | 0.987 | 0.617 | Cs <sub>2</sub> CuPtF <sub>6</sub> | 0.998 | 0.598  | Cs <sub>2</sub> CdMnF <sub>6</sub>  | 0.991 | 0.609 |
| Cs <sub>2</sub> FeIrI <sub>6</sub> | 0.900 | 0.382 | Cs <sub>2</sub> CuTeI <sub>6</sub> | 0.893 | 0.393  | Cs <sub>2</sub> CdFeI <sub>6</sub>  | 0.893 | 0.393 |
| Cs <sub>2</sub> FeIrF <sub>6</sub> | 0.978 | 0.632 | Cs <sub>2</sub> CuTeF <sub>6</sub> | 0.966 | 0.650  | Cs <sub>2</sub> CdFeF <sub>6</sub>  | 0.966 | 0.650 |
| Cs <sub>2</sub> FePtI <sub>6</sub> | 0.906 | 0.373 | Cs <sub>2</sub> ZnPdI <sub>6</sub> | 0.912 | 0.364  | Cs <sub>2</sub> CdCoI <sub>6</sub>  | 0.898 | 0.385 |
| Cs <sub>2</sub> FePtF <sub>6</sub> | 0.987 | 0.617 | Cs <sub>2</sub> ZnPdF <sub>6</sub> | 0.996 | 0.602  | Cs <sub>2</sub> CdCoF <sub>6</sub>  | 0.974 | 0.637 |
| Cs <sub>2</sub> FeTeI <sub>6</sub> | 0.886 | 0.405 | Cs <sub>2</sub> ZnIrI <sub>6</sub> | 0.906 | 0.373  | Cs <sub>2</sub> CdNiI <sub>6</sub>  | 0.906 | 0.373 |
| Cs <sub>2</sub> FeTeF <sub>6</sub> | 0.956 | 0.669 | Cs <sub>2</sub> ZnIrF <sub>6</sub> | 0.987 | 0.617  | Cs <sub>2</sub> CdNiF <sub>6</sub>  | 0.987 | 0.617 |
| Cs <sub>2</sub> CoNiI <sub>6</sub> | 0.938 | 0.326 | Cs <sub>2</sub> ZnPtI <sub>6</sub> | 0.912 | 0.364  | Cs <sub>2</sub> CdCuI <sub>6</sub>  | 0.900 | 0.382 |
| Cs <sub>2</sub> CoNiF <sub>6</sub> | 1.036 | 0.539 | Cs <sub>2</sub> ZnPtF <sub>6</sub> | 0.996 | 0.602  | Cs <sub>2</sub> CdCuF <sub>6</sub>  | 0.978 | 0.632 |
| Cs <sub>2</sub> CoCuI <sub>6</sub> | 0.932 | 0.335 | Cs <sub>2</sub> ZnTeI <sub>6</sub> | 0.891 | 0.395  | Cs <sub>2</sub> CdZnI <sub>6</sub>  | 0.899 | 0.384 |
| Cs <sub>2</sub> CoCuF <sub>6</sub> | 1.026 | 0.555 | Cs <sub>2</sub> ZnTeF <sub>6</sub> | 0.964 | 0.654  | Cs <sub>2</sub> CdZnF <sub>6</sub>  | 0.975 | 0.635 |
| Cs <sub>2</sub> CoZnI <sub>6</sub> | 0.930 | 0.338 | Cs <sub>2</sub> PdIrI <sub>6</sub> | 0.888 | 0.400  | Cs <sub>2</sub> CdPdI <sub>6</sub>  | 0.881 | 0.411 |
| Cs <sub>2</sub> CoZnF <sub>6</sub> | 1.024 | 0.558 | Cs <sub>2</sub> PdIrF <sub>6</sub> | 0.960 | 0.662  | Cs <sub>2</sub> CdPdF <sub>6</sub>  | 0.949 | 0.680 |
| Cs <sub>2</sub> CoPdI <sub>6</sub> | 0.911 | 0.365 | Cs <sub>2</sub> PdPtI <sub>6</sub> | 0.894 | 0.391  | Cs <sub>2</sub> CdIrI <sub>6</sub>  | 0.876 | 0.420 |
| Cs <sub>2</sub> CoPdF <sub>6</sub> | 0.995 | 0.603 | Cs <sub>2</sub> PdPtF <sub>6</sub> | 0.969 | 0.647  | Cs <sub>2</sub> CdIrF <sub>6</sub>  | 0.941 | 0.695 |
| Cs <sub>2</sub> CoIrI <sub>6</sub> | 0.905 | 0.374 | Cs <sub>2</sub> PdTeI <sub>6</sub> | 0.874 | 0.423  | Cs <sub>2</sub> CdPtI <sub>6</sub>  | 0.881 | 0.411 |
| Cs <sub>2</sub> CoIrF <sub>6</sub> | 0.986 | 0.618 | Cs <sub>2</sub> PdTeF <sub>6</sub> | 0.939 | 0.699  | Cs <sub>2</sub> CdPtF <sub>6</sub>  | 0.949 | 0.680 |
| Cs <sub>2</sub> CoPtI <sub>6</sub> | 0.911 | 0.365 | Cs <sub>2</sub> IrPtI <sub>6</sub> | 0.888 | 0.4000 | Cs <sub>2</sub> CdTeI <sub>6</sub>  | 0.862 | 0.443 |
| Cs <sub>2</sub> CoPtF <sub>6</sub> | 0.995 | 0.603 | Cs <sub>2</sub> IrPtF <sub>6</sub> | 0.960 | 0.662  | Cs <sub>2</sub> CdTeF <sub>6</sub>  | 0.920 | 0.733 |
| Cs <sub>2</sub> CoTeI <sub>6</sub> | 0.891 | 0.397 | Cs <sub>2</sub> IrTeI <sub>6</sub> | 0.869 | 0.432  | Cs <sub>2</sub> PbSnBr <sub>6</sub> | 0.824 | 0.589 |
| Cs <sub>2</sub> CoTeF <sub>6</sub> | 0.963 | 0.656 | Cs <sub>2</sub> IrTeF <sub>6</sub> | 0.930 | 0.714  | Cs <sub>2</sub> PbSnCl <sub>6</sub> | 0.830 | 0.638 |
| Cs <sub>2</sub> NiCuI <sub>6</sub> | 0.940 | 0.323 | Cs <sub>2</sub> PtTeI <sub>6</sub> | 0.874 | 0.423  | Cs <sub>2</sub> PbGeBr <sub>6</sub> | 0.879 | 0.490 |
| Cs <sub>2</sub> NiCuF <sub>6</sub> | 1.040 | 0.534 | Cs <sub>2</sub> PtTeF <sub>6</sub> | 0.939 | 0.699  | Cs <sub>2</sub> PbGeCl <sub>6</sub> | 0.888 | 0.530 |
| Cs <sub>2</sub> NiZnI <sub>6</sub> | 0.939 | 0.325 | Cs <sub>2</sub> CdPbI <sub>6</sub> | 0.837 | 0.486  | Cs <sub>2</sub> PbBeBr <sub>6</sub> | 0.923 | 0.418 |
| Cs <sub>2</sub> NiZnF <sub>6</sub> | 1.037 | 0.538 | Cs <sub>2</sub> CdPbF <sub>6</sub> | 0.884 | 0.805  | Cs <sub>2</sub> PbBeCl <sub>6</sub> | 0.936 | 0.453 |
| Cs <sub>2</sub> NiPdI <sub>6</sub> | 0.920 | 0.352 | Cs <sub>2</sub> CdSnI <sub>6</sub> | 0.846 | 0.470  | Cs <sub>2</sub> PbMgBr <sub>6</sub> | 0.881 | 0.487 |
| Cs <sub>2</sub> NiPdF <sub>6</sub> | 1.008 | 0.583 | Cs <sub>2</sub> CdSnF <sub>6</sub> | 0.897 | 0.778  | Cs <sub>2</sub> PbMgCl <sub>6</sub> | 0.890 | 0.528 |
| Cs <sub>2</sub> NiIrI <sub>6</sub> | 0.914 | 0.361 | Cs <sub>2</sub> CdGeI <sub>6</sub> | 0.900 | 0.382  | Cs <sub>2</sub> PbCaBr <sub>6</sub> | 0.840 | 0.559 |
| Cs <sub>2</sub> NiIrF <sub>6</sub> | 0.998 | 0.598 | Cs <sub>2</sub> CdGeF <sub>6</sub> | 0.978 | 0.632  | Cs <sub>2</sub> PbCaCl <sub>6</sub> | 0.847 | 0.605 |
| Cs <sub>2</sub> NiPtI <sub>6</sub> | 0.920 | 0.352 | Cs <sub>2</sub> CdBeI <sub>6</sub> | 0.944 | 0.318  | Cs <sub>2</sub> PbSrBr <sub>6</sub> | 0.816 | 0.605 |
| Cs <sub>2</sub> NiPtF <sub>6</sub> | 1.008 | 0.583 | Cs <sub>2</sub> CdBeF <sub>6</sub> | 1.045 | 0.526  | Cs <sub>2</sub> PbSrCl <sub>6</sub> | 0.822 | 0.655 |
| Cs <sub>2</sub> NiTeI <sub>6</sub> | 0.899 | 0.384 | Cs <sub>2</sub> CdMgI <sub>6</sub> | 0.902 | 0.380  | Cs <sub>2</sub> PbBaBr <sub>6</sub> | 0.795 | 0.648 |
| Cs <sub>2</sub> NiTeF <sub>6</sub> | 0.975 | 0.635 | Cs <sub>2</sub> CdMgF <sub>6</sub> | 0.980 | 0.628  | Cs <sub>2</sub> PbBaCl <sub>6</sub> | 0.799 | 0.702 |
| Cs <sub>2</sub> CuZnI <sub>6</sub> | 0.932 | 0.334 | Cs <sub>2</sub> CdCaI <sub>6</sub> | 0.862 | 0.443  | Cs <sub>2</sub> PbMnBr <sub>6</sub> | 0.888 | 0.474 |
| Cs <sub>2</sub> CuZnF <sub>6</sub> | 1.027 | 0.553 | Cs <sub>2</sub> CdCaF <sub>6</sub> | 0.920 | 0.733  | Cs <sub>2</sub> PbMnCl <sub>6</sub> | 0.898 | 0.514 |
| Cs <sub>2</sub> CuPdI <sub>6</sub> | 0.914 | 0.361 | Cs <sub>2</sub> CdSrI <sub>6</sub> | 0.838 | 0.484  | Cs <sub>2</sub> PbFeBr <sub>6</sub> | 0.872 | 0.503 |
| Cs <sub>2</sub> CuPdF <sub>6</sub> | 0.998 | 0.598 | Cs <sub>2</sub> CdSrF <sub>6</sub> | 0.886 | 0.801  | Cs <sub>2</sub> PbFeCl <sub>6</sub> | 0.880 | 0.544 |
| Cs <sub>2</sub> CuIrI <sub>6</sub> | 0.908 | 0.370 | Cs <sub>2</sub> CdBaI <sub>6</sub> | 0.817 | 0.523  | Cs <sub>2</sub> PbCoBr <sub>6</sub> | 0.877 | 0.494 |
| Cs <sub>2</sub> CuIrF <sub>6</sub> | 0.989 | 0.613 | Cs <sub>2</sub> CdBaF <sub>6</sub> | 0.855 | 0.865  | Cs <sub>2</sub> PbCoCl <sub>6</sub> | 0.886 | 0.535 |
| Cs <sub>2</sub> CuPtI <sub>6</sub> | 0.914 | 0.361 | Cs <sub>2</sub> CdMnI <sub>6</sub> | 0.909 | 0.368  | Cs <sub>2</sub> PbNiBr <sub>6</sub> | 0.885 | 0.480 |

| Material                            | t     | u     | Material                            | t     | u     | Material                            | t     | u     |
|-------------------------------------|-------|-------|-------------------------------------|-------|-------|-------------------------------------|-------|-------|
| Cs <sub>2</sub> PbNiCl <sub>6</sub> | 0.895 | 0.519 | Cs <sub>2</sub> SnIrCl <sub>6</sub> | 0.873 | 0.558 | Cs <sub>2</sub> BeSrCl <sub>6</sub> | 0.937 | 0.450 |
| Cs <sub>2</sub> PbCuBr <sub>6</sub> | 0.879 | 0.490 | Cs <sub>2</sub> SnPtBr <sub>6</sub> | 0.870 | 0.505 | Cs <sub>2</sub> BeBaBr <sub>6</sub> | 0.897 | 0.459 |
| Cs <sub>2</sub> PbCuCl <sub>6</sub> | 0.888 | 0.530 | Cs <sub>2</sub> SnPtCl <sub>6</sub> | 0.879 | 0.547 | Cs <sub>2</sub> BeBaCl <sub>6</sub> | 0.908 | 0.497 |
| Cs <sub>2</sub> PbZnBr <sub>6</sub> | 0.878 | 0.492 | Cs <sub>2</sub> SnTeBr <sub>6</sub> | 0.850 | 0.541 | Cs <sub>2</sub> BeMnBr <sub>6</sub> | 1.019 | 0.286 |
| Cs <sub>2</sub> PbZnCl <sub>6</sub> | 0.887 | 0.533 | Cs <sub>2</sub> SnTeCl <sub>6</sub> | 0.857 | 0.586 | Cs <sub>2</sub> BeMnCl <sub>6</sub> | 1.038 | 0.309 |
| Cs <sub>2</sub> PbPdBr <sub>6</sub> | 0.860 | 0.523 | Cs <sub>2</sub> GeBeBr <sub>6</sub> | 1.007 | 0.301 | Cs <sub>2</sub> BeFeBr <sub>6</sub> | 0.997 | 0.314 |
| Cs <sub>2</sub> PbPdCl <sub>6</sub> | 0.868 | 0.566 | Cs <sub>2</sub> GeBeCl <sub>6</sub> | 1.025 | 0.326 | Cs <sub>2</sub> BeFeCl <sub>6</sub> | 1.015 | 0.340 |
| Cs <sub>2</sub> PbIrBr <sub>6</sub> | 0.854 | 0.533 | Cs <sub>2</sub> GeMgBr <sub>6</sub> | 0.956 | 0.370 | Cs <sub>2</sub> BeCoBr <sub>6</sub> | 1.004 | 0.305 |
| Cs <sub>2</sub> PbIrCl <sub>6</sub> | 0.862 | 0.577 | Cs <sub>2</sub> GeMgCl <sub>6</sub> | 0.971 | 0.401 | Cs <sub>2</sub> BeCoCl <sub>6</sub> | 1.022 | 0.330 |
| Cs <sub>2</sub> PbPtBr <sub>6</sub> | 0.860 | 0.523 | Cs <sub>2</sub> GeCaBr <sub>6</sub> | 0.909 | 0.441 | Cs <sub>2</sub> BeNiBr <sub>6</sub> | 1.015 | 0.291 |
| Cs <sub>2</sub> PbPtCl <sub>6</sub> | 0.868 | 0.566 | Cs <sub>2</sub> GeCaCl <sub>6</sub> | 0.920 | 0.478 | Cs <sub>2</sub> BeNiCl <sub>6</sub> | 1.034 | 0.315 |
| Cs <sub>2</sub> PbTeBr <sub>6</sub> | 0.840 | 0.559 | Cs <sub>2</sub> GeSrBr <sub>6</sub> | 0.881 | 0.487 | Cs <sub>2</sub> BeCuBr <sub>6</sub> | 1.007 | 0.301 |
| Cs <sub>2</sub> PbTeCl <sub>6</sub> | 0.847 | 0.605 | Cs <sub>2</sub> GeSrCl <sub>6</sub> | 0.890 | 0.528 | Cs <sub>2</sub> BeCuCl <sub>6</sub> | 1.025 | 0.326 |
| Cs <sub>2</sub> SnGeBr <sub>6</sub> | 0.890 | 0.472 | Cs <sub>2</sub> GeBaBr <sub>6</sub> | 0.856 | 0.531 | Cs <sub>2</sub> BeZnBr <sub>6</sub> | 1.005 | 0.304 |
| Cs <sub>2</sub> SnGeCl <sub>6</sub> | 0.900 | 0.511 | Cs <sub>2</sub> GeBaCl <sub>6</sub> | 0.863 | 0.575 | Cs <sub>2</sub> BeZnCl <sub>6</sub> | 1.023 | 0.329 |
| Cs <sub>2</sub> SnBeBr <sub>6</sub> | 0.935 | 0.401 | Cs <sub>2</sub> GeMnBr <sub>6</sub> | 0.965 | 0.357 | Cs <sub>2</sub> BePdBr <sub>6</sub> | 0.982 | 0.334 |
| Cs <sub>2</sub> SnBeCl <sub>6</sub> | 0.948 | 0.434 | Cs <sub>2</sub> GeMnCl <sub>6</sub> | 0.980 | 0.387 | Cs <sub>2</sub> BePdCl <sub>6</sub> | 0.998 | 0.362 |
| Cs <sub>2</sub> SnMgBr <sub>6</sub> | 0.891 | 0.469 | Cs <sub>2</sub> GeFeBr <sub>6</sub> | 0.945 | 0.385 | Cs <sub>2</sub> BeIrBr <sub>6</sub> | 0.974 | 0.344 |
| Cs <sub>2</sub> SnMgCl <sub>6</sub> | 0.901 | 0.508 | Cs <sub>2</sub> GeFeCl <sub>6</sub> | 0.959 | 0.417 | Cs <sub>2</sub> BeIrCl <sub>6</sub> | 0.990 | 0.373 |
| Cs <sub>2</sub> SnCaBr <sub>6</sub> | 0.850 | 0.541 | Cs <sub>2</sub> GeCoBr <sub>6</sub> | 0.952 | 0.376 | Cs <sub>2</sub> BePtBr <sub>6</sub> | 0.982 | 0.334 |
| Cs <sub>2</sub> SnCaCl <sub>6</sub> | 0.857 | 0.586 | Cs <sub>2</sub> GeCoCl <sub>6</sub> | 0.966 | 0.407 | Cs <sub>2</sub> BePtCl <sub>6</sub> | 0.998 | 0.362 |
| Cs <sub>2</sub> SnSrBr <sub>6</sub> | 0.825 | 0.587 | Cs <sub>2</sub> GeNiBr <sub>6</sub> | 0.961 | 0.362 | Cs <sub>2</sub> BeTeBr <sub>6</sub> | 0.956 | 0.370 |
| Cs <sub>2</sub> SnSrCl <sub>6</sub> | 0.831 | 0.635 | Cs <sub>2</sub> GeNiCl <sub>6</sub> | 0.976 | 0.392 | Cs <sub>2</sub> BeTeCl <sub>6</sub> | 0.971 | 0.401 |
| Cs <sub>2</sub> SnBaBr <sub>6</sub> | 0.803 | 0.630 | Cs <sub>2</sub> GeCuBr <sub>6</sub> | 0.954 | 0.372 | Cs <sub>2</sub> MgCaBr <sub>6</sub> | 0.910 | 0.439 |
| Cs <sub>2</sub> SnBaCl <sub>6</sub> | 0.808 | 0.682 | Cs <sub>2</sub> GeCuCl <sub>6</sub> | 0.969 | 0.403 | Cs <sub>2</sub> MgCaCl <sub>6</sub> | 0.922 | 0.475 |
| Cs <sub>2</sub> SnMnBr <sub>6</sub> | 0.899 | 0.457 | Cs <sub>2</sub> GeZnBr <sub>6</sub> | 0.952 | 0.375 | Cs <sub>2</sub> MgSrBr <sub>6</sub> | 0.882 | 0.485 |
| Cs <sub>2</sub> SnMnCl <sub>6</sub> | 0.910 | 0.494 | Cs <sub>2</sub> GeZnCl <sub>6</sub> | 0.967 | 0.406 | Cs <sub>2</sub> MgSrCl <sub>6</sub> | 0.892 | 0.525 |
| Cs <sub>2</sub> SnFeBr <sub>6</sub> | 0.882 | 0.485 | Cs <sub>2</sub> GePdBr <sub>6</sub> | 0.932 | 0.406 | Cs <sub>2</sub> MgBaBr <sub>6</sub> | 0.857 | 0.528 |
| Cs <sub>2</sub> SnFeCl <sub>6</sub> | 0.892 | 0.525 | Cs <sub>2</sub> GePdCl <sub>6</sub> | 0.945 | 0.439 | Cs <sub>2</sub> MgBaCl <sub>6</sub> | 0.865 | 0.572 |
| Cs <sub>2</sub> SnCoBr <sub>6</sub> | 0.887 | 0.476 | Cs <sub>2</sub> GeIrBr <sub>6</sub> | 0.925 | 0.416 | Cs <sub>2</sub> MgMnBr <sub>6</sub> | 0.967 | 0.355 |
| Cs <sub>2</sub> SnCoCl <sub>6</sub> | 0.897 | 0.515 | Cs <sub>2</sub> GeIrCl <sub>6</sub> | 0.937 | 0.45  | Cs <sub>2</sub> MgMnCl <sub>6</sub> | 0.982 | 0.384 |
| Cs <sub>2</sub> SnNiBr <sub>6</sub> | 0.896 | 0.462 | Cs <sub>2</sub> GePtBr <sub>6</sub> | 0.932 | 0.406 | Cs <sub>2</sub> MgFeBr <sub>6</sub> | 0.947 | 0.383 |
| Cs <sub>2</sub> SnNiCl <sub>6</sub> | 0.906 | 0.500 | Cs <sub>2</sub> GePtCl <sub>6</sub> | 0.945 | 0.439 | Cs <sub>2</sub> MgFeCl <sub>6</sub> | 0.961 | 0.414 |
| Cs <sub>2</sub> SnCuBr <sub>6</sub> | 0.89  | 0.472 | Cs <sub>2</sub> GeTeBr <sub>6</sub> | 0.909 | 0.441 | Cs <sub>2</sub> MgCoBr <sub>6</sub> | 0.953 | 0.374 |
| Cs <sub>2</sub> SnCuCl <sub>6</sub> | 0.900 | 0.511 | Cs <sub>2</sub> GeTeCl <sub>6</sub> | 0.92  | 0.478 | Cs <sub>2</sub> MgCoCl <sub>6</sub> | 0.968 | 0.405 |
| Cs <sub>2</sub> SnZnBr <sub>6</sub> | 0.888 | 0.474 | Cs <sub>2</sub> BeMgBr <sub>6</sub> | 1.009 | 0.298 | Cs <sub>2</sub> MgNiBr <sub>6</sub> | 0.963 | 0.360 |
| Cs <sub>2</sub> SnZnCl <sub>6</sub> | 0.898 | 0.514 | Cs <sub>2</sub> BeMgCl <sub>6</sub> | 1.027 | 0.323 | Cs <sub>2</sub> MgNiCl <sub>6</sub> | 0.978 | 0.390 |
| Cs <sub>2</sub> SnPdBr <sub>6</sub> | 0.870 | 0.505 | Cs <sub>2</sub> BeCaBr <sub>6</sub> | 0.956 | 0.370 | Cs <sub>2</sub> MgCuBr <sub>6</sub> | 0.956 | 0.370 |
| Cs <sub>2</sub> SnPdCl <sub>6</sub> | 0.879 | 0.547 | Cs <sub>2</sub> BeCaCl <sub>6</sub> | 0.971 | 0.401 | Cs <sub>2</sub> MgCuCl <sub>6</sub> | 0.971 | 0.401 |
| Cs <sub>2</sub> SnIrBr <sub>6</sub> | 0.864 | 0.515 | Cs <sub>2</sub> BeSrBr <sub>6</sub> | 0.925 | 0.416 | Cs <sub>2</sub> MgZnBr <sub>6</sub> | 0.954 | 0.372 |

| Material                            | t     | u     | Material                            | t     | u     | Material                            | t     | u     |
|-------------------------------------|-------|-------|-------------------------------------|-------|-------|-------------------------------------|-------|-------|
| Cs <sub>2</sub> MgZnCl <sub>6</sub> | 0.969 | 0.403 | Cs <sub>2</sub> SrCoCl <sub>6</sub> | 0.888 | 0.532 | Cs <sub>2</sub> MnNiCl <sub>6</sub> | 0.988 | 0.376 |
| Cs <sub>2</sub> MgPdBr <sub>6</sub> | 0.933 | 0.403 | Cs <sub>2</sub> SrNiBr <sub>6</sub> | 0.887 | 0.477 | Cs <sub>2</sub> MnCuBr <sub>6</sub> | 0.965 | 0.357 |
| Cs <sub>2</sub> MgPdCl <sub>6</sub> | 0.946 | 0.436 | Cs <sub>2</sub> SrNiCl <sub>6</sub> | 0.896 | 0.517 | Cs <sub>2</sub> MnCuCl <sub>6</sub> | 0.980 | 0.387 |
| Cs <sub>2</sub> MgIrBr <sub>6</sub> | 0.927 | 0.413 | Cs <sub>2</sub> SrCuBr <sub>6</sub> | 0.881 | 0.487 | Cs <sub>2</sub> MnZnBr <sub>6</sub> | 0.963 | 0.360 |
| Cs <sub>2</sub> MgIrCl <sub>6</sub> | 0.939 | 0.448 | Cs <sub>2</sub> SrCuCl <sub>6</sub> | 0.890 | 0.528 | Cs <sub>2</sub> MnZnCl <sub>6</sub> | 0.978 | 0.390 |
| Cs <sub>2</sub> MgPtBr <sub>6</sub> | 0.933 | 0.403 | Cs <sub>2</sub> SrZnBr <sub>6</sub> | 0.879 | 0.490 | Cs <sub>2</sub> MnPdBr <sub>6</sub> | 0.942 | 0.390 |
| Cs <sub>2</sub> MgPtCl <sub>6</sub> | 0.946 | 0.436 | Cs <sub>2</sub> SrZnCl <sub>6</sub> | 0.888 | 0.530 | Cs <sub>2</sub> MnPdCl <sub>6</sub> | 0.956 | 0.423 |
| Cs <sub>2</sub> MgTeBr <sub>6</sub> | 0.910 | 0.439 | Cs <sub>2</sub> SrPdBr <sub>6</sub> | 0.861 | 0.520 | Cs <sub>2</sub> MnIrBr <sub>6</sub> | 0.935 | 0.401 |
| Cs <sub>2</sub> MgTeCl <sub>6</sub> | 0.922 | 0.475 | Cs <sub>2</sub> SrPdCl <sub>6</sub> | 0.870 | 0.564 | Cs <sub>2</sub> MnIrCl <sub>6</sub> | 0.948 | 0.434 |
| Cs <sub>2</sub> CaSrBr <sub>6</sub> | 0.842 | 0.556 | Cs <sub>2</sub> SrIrBr <sub>6</sub> | 0.856 | 0.531 | Cs <sub>2</sub> MnPtBr <sub>6</sub> | 0.942 | 0.390 |
| Cs <sub>2</sub> CaSrCl <sub>6</sub> | 0.849 | 0.602 | Cs <sub>2</sub> SrIrCl <sub>6</sub> | 0.863 | 0.575 | Cs <sub>2</sub> MnPtCl <sub>6</sub> | 0.956 | 0.423 |
| Cs <sub>2</sub> CaBaBr <sub>6</sub> | 0.819 | 0.599 | Cs <sub>2</sub> SrPtBr <sub>6</sub> | 0.861 | 0.520 | Cs <sub>2</sub> MnTeBr <sub>6</sub> | 0.918 | 0.426 |
| Cs <sub>2</sub> CaBaCl <sub>6</sub> | 0.824 | 0.649 | Cs <sub>2</sub> SrPtCl <sub>6</sub> | 0.870 | 0.564 | Cs <sub>2</sub> MnTeCl <sub>6</sub> | 0.930 | 0.461 |
| Cs <sub>2</sub> CaMnBr <sub>6</sub> | 0.918 | 0.426 | Cs <sub>2</sub> SrTeBr <sub>6</sub> | 0.842 | 0.556 | Cs <sub>2</sub> FeCoBr <sub>6</sub> | 0.943 | 0.389 |
| Cs <sub>2</sub> CaMnCl <sub>6</sub> | 0.930 | 0.461 | Cs <sub>2</sub> SrTeCl <sub>6</sub> | 0.849 | 0.602 | Cs <sub>2</sub> FeCoCl <sub>6</sub> | 0.957 | 0.421 |
| Cs <sub>2</sub> CaFeBr <sub>6</sub> | 0.901 | 0.454 | Cs <sub>2</sub> BaMnBr <sub>6</sub> | 0.864 | 0.515 | Cs <sub>2</sub> FeNiBr <sub>6</sub> | 0.952 | 0.375 |
| Cs <sub>2</sub> CaFeCl <sub>6</sub> | 0.911 | 0.492 | Cs <sub>2</sub> BaMnCl <sub>6</sub> | 0.873 | 0.558 | Cs <sub>2</sub> FeNiCl <sub>6</sub> | 0.967 | 0.406 |
| Cs <sub>2</sub> CaCoBr <sub>6</sub> | 0.906 | 0.445 | Cs <sub>2</sub> BaFeBr <sub>6</sub> | 0.849 | 0.543 | Cs <sub>2</sub> FeCuBr <sub>6</sub> | 0.945 | 0.385 |
| Cs <sub>2</sub> CaCoCl <sub>6</sub> | 0.917 | 0.482 | Cs <sub>2</sub> BaFeCl <sub>6</sub> | 0.856 | 0.588 | Cs <sub>2</sub> FeCuCl <sub>6</sub> | 0.959 | 0.417 |
| Cs <sub>2</sub> CaNiBr <sub>6</sub> | 0.915 | 0.431 | Cs <sub>2</sub> BaCoBr <sub>6</sub> | 0.853 | 0.534 | Cs <sub>2</sub> FeZnBr <sub>6</sub> | 0.944 | 0.388 |
| Cs <sub>2</sub> CaNiCl <sub>6</sub> | 0.927 | 0.467 | Cs <sub>2</sub> BaCoCl <sub>6</sub> | 0.861 | 0.579 | Cs <sub>2</sub> FeZnCl <sub>6</sub> | 0.957 | 0.420 |
| Cs <sub>2</sub> CaCuBr <sub>6</sub> | 0.909 | 0.441 | Cs <sub>2</sub> BaNiBr <sub>6</sub> | 0.861 | 0.520 | Cs <sub>2</sub> FePdBr <sub>6</sub> | 0.923 | 0.418 |
| Cs <sub>2</sub> CaCuCl <sub>6</sub> | 0.920 | 0.478 | Cs <sub>2</sub> BaNiCl <sub>6</sub> | 0.870 | 0.564 | Cs <sub>2</sub> FePdCl <sub>6</sub> | 0.936 | 0.453 |
| Cs <sub>2</sub> CaZnBr <sub>6</sub> | 0.907 | 0.444 | Cs <sub>2</sub> BaCuBr <sub>6</sub> | 0.856 | 0.531 | Cs <sub>2</sub> FeIrBr <sub>6</sub> | 0.917 | 0.429 |
| Cs <sub>2</sub> CaZnCl <sub>6</sub> | 0.918 | 0.481 | Cs <sub>2</sub> BaCuCl <sub>6</sub> | 0.863 | 0.575 | Cs <sub>2</sub> FeIrCl <sub>6</sub> | 0.929 | 0.464 |
| Cs <sub>2</sub> CaPdBr <sub>6</sub> | 0.888 | 0.474 | Cs <sub>2</sub> BaZnBr <sub>6</sub> | 0.854 | 0.533 | Cs <sub>2</sub> FePtBr <sub>6</sub> | 0.923 | 0.418 |
| Cs <sub>2</sub> CaPdCl <sub>6</sub> | 0.898 | 0.514 | Cs <sub>2</sub> BaZnCl <sub>6</sub> | 0.862 | 0.577 | Cs <sub>2</sub> FePtCl <sub>6</sub> | 0.936 | 0.453 |
| Cs <sub>2</sub> CaIrBr <sub>6</sub> | 0.882 | 0.485 | Cs <sub>2</sub> BaPdBr <sub>6</sub> | 0.837 | 0.564 | Cs <sub>2</sub> FeTeBr <sub>6</sub> | 0.901 | 0.454 |
| Cs <sub>2</sub> CaIrCl <sub>6</sub> | 0.892 | 0.525 | Cs <sub>2</sub> BaPdCl <sub>6</sub> | 0.844 | 0.610 | Cs <sub>2</sub> FeTeCl <sub>6</sub> | 0.911 | 0.492 |
| Cs <sub>2</sub> CaPtBr <sub>6</sub> | 0.888 | 0.474 | Cs <sub>2</sub> BaIrBr <sub>6</sub> | 0.832 | 0.574 | Cs <sub>2</sub> CoNiBr <sub>6</sub> | 0.959 | 0.366 |
| Cs <sub>2</sub> CaPtCl <sub>6</sub> | 0.898 | 0.514 | Cs <sub>2</sub> BaIrCl <sub>6</sub> | 0.838 | 0.622 | Cs <sub>2</sub> CoNiCl <sub>6</sub> | 0.974 | 0.396 |
| Cs <sub>2</sub> CaTeBr <sub>6</sub> | 0.867 | 0.510 | Cs <sub>2</sub> BaPtBr <sub>6</sub> | 0.837 | 0.564 | Cs <sub>2</sub> CoCuBr <sub>6</sub> | 0.952 | 0.376 |
| Cs <sub>2</sub> CaTeCl <sub>6</sub> | 0.876 | 0.552 | Cs <sub>2</sub> BaPtCl <sub>6</sub> | 0.844 | 0.610 | Cs <sub>2</sub> CoCuCl <sub>6</sub> | 0.966 | 0.407 |
| Cs <sub>2</sub> SrBaBr <sub>6</sub> | 0.796 | 0.645 | Cs <sub>2</sub> BaTeBr <sub>6</sub> | 0.819 | 0.599 | Cs <sub>2</sub> CoZnBr <sub>6</sub> | 0.95  | 0.379 |
| Cs <sub>2</sub> SrBaCl <sub>6</sub> | 0.800 | 0.699 | Cs <sub>2</sub> BaTeCl <sub>6</sub> | 0.824 | 0.649 | Cs <sub>2</sub> CoZnCl <sub>6</sub> | 0.964 | 0.410 |
| Cs <sub>2</sub> SrMnBr <sub>6</sub> | 0.890 | 0.472 | Cs <sub>2</sub> MnFeBr <sub>6</sub> | 0.956 | 0.370 | Cs <sub>2</sub> CoPdBr <sub>6</sub> | 0.929 | 0.409 |
| Cs <sub>2</sub> SrMnCl <sub>6</sub> | 0.900 | 0.511 | Cs <sub>2</sub> MnFeCl <sub>6</sub> | 0.971 | 0.401 | Cs <sub>2</sub> CoPdCl <sub>6</sub> | 0.942 | 0.443 |
| Cs <sub>2</sub> SrFeBr <sub>6</sub> | 0.873 | 0.500 | Cs <sub>2</sub> MnCoBr <sub>6</sub> | 0.962 | 0.361 | Cs <sub>2</sub> CoIrBr <sub>6</sub> | 0.922 | 0.420 |
| Cs <sub>2</sub> SrFeCl <sub>6</sub> | 0.882 | 0.541 | Cs <sub>2</sub> MnCoCl <sub>6</sub> | 0.977 | 0.391 | Cs <sub>2</sub> CoIrCl <sub>6</sub> | 0.935 | 0.454 |
| Cs <sub>2</sub> SrCoBr <sub>6</sub> | 0.878 | 0.491 | Cs <sub>2</sub> MnNiBr <sub>6</sub> | 0.972 | 0.347 | Cs <sub>2</sub> CoPtBr <sub>6</sub> | 0.929 | 0.409 |

| Material                            | t     | u     | Material                            | t     | u     | Material                            | t     | u     |
|-------------------------------------|-------|-------|-------------------------------------|-------|-------|-------------------------------------|-------|-------|
| Cs <sub>2</sub> CoPtCl <sub>6</sub> | 0.942 | 0.443 | Cs <sub>2</sub> IrPtCl <sub>6</sub> | 0.915 | 0.486 | Cs <sub>2</sub> CdTeCl <sub>6</sub> | 0.884 | 0.539 |
| Cs <sub>2</sub> CoTeBr <sub>6</sub> | 0.906 | 0.445 | Cs <sub>2</sub> IrTeBr <sub>6</sub> | 0.882 | 0.485 | <sup>6</sup> CsPbI <sub>3</sub>     | 0.807 | 0.541 |
| Cs <sub>2</sub> CoTeCl <sub>6</sub> | 0.917 | 0.482 | Cs <sub>2</sub> IrTeCl <sub>6</sub> | 0.892 | 0.525 | CsSnF <sub>3</sub>                  | 0.866 | 0.842 |
| Cs <sub>2</sub> NiCuBr <sub>6</sub> | 0.961 | 0.362 | Cs <sub>2</sub> PtTeBr <sub>6</sub> | 0.888 | 0.474 | CsSnI <sub>3</sub>                  | 0.824 | 0.509 |
| Cs <sub>2</sub> NiCuCl <sub>6</sub> | 0.976 | 0.392 | Cs <sub>2</sub> PtTeCl <sub>6</sub> | 0.898 | 0.514 | CsGeF <sub>3</sub>                  | 1.03  | 0.549 |
| Cs <sub>2</sub> NiZnBr <sub>6</sub> | 0.960 | 0.365 | Cs <sub>2</sub> CdPbBr <sub>6</sub> | 0.847 | 0.546 | CsGeI <sub>3</sub>                  | 0.934 | 0.332 |
| Cs <sub>2</sub> NiZnCl <sub>6</sub> | 0.975 | 0.395 | Cs <sub>2</sub> CdPbCl <sub>6</sub> | 0.854 | 0.591 | CsBeF <sub>3</sub>                  | 1.192 | 0.338 |
| Cs <sub>2</sub> NiPdBr <sub>6</sub> | 0.939 | 0.395 | Cs <sub>2</sub> CdSnBr <sub>6</sub> | 0.857 | 0.528 | CsBeI <sub>3</sub>                  | 1.033 | 0.205 |
| Cs <sub>2</sub> NiPdCl <sub>6</sub> | 0.952 | 0.428 | Cs <sub>2</sub> CdSnCl <sub>6</sub> | 0.865 | 0.572 | CsMgF <sub>3</sub>                  | 1.035 | 0.541 |
| Cs <sub>2</sub> NiIrBr <sub>6</sub> | 0.932 | 0.406 | Cs <sub>2</sub> CdGeBr <sub>6</sub> | 0.917 | 0.429 | CsMgI <sub>3</sub>                  | 0.937 | 0.327 |
| Cs <sub>2</sub> NiIrCl <sub>6</sub> | 0.945 | 0.439 | Cs <sub>2</sub> CdGeCl <sub>6</sub> | 0.929 | 0.464 | CsCaF <sub>3</sub>                  | 0.910 | 0.752 |
| Cs <sub>2</sub> NiPtBr <sub>6</sub> | 0.939 | 0.395 | Cs <sub>2</sub> CdBeBr <sub>6</sub> | 0.965 | 0.357 | CsCaI <sub>3</sub>                  | 0.855 | 0.455 |
| Cs <sub>2</sub> NiPtCl <sub>6</sub> | 0.952 | 0.428 | Cs <sub>2</sub> CdBeCl <sub>6</sub> | 0.980 | 0.387 | CsSrF <sub>3</sub>                  | 0.845 | 0.887 |
| Cs <sub>2</sub> NiTeBr <sub>6</sub> | 0.915 | 0.431 | Cs <sub>2</sub> CdMgBr <sub>6</sub> | 0.918 | 0.426 | CsSrI <sub>3</sub>                  | 0.810 | 0.536 |
| Cs <sub>2</sub> NiTeCl <sub>6</sub> | 0.927 | 0.467 | Cs <sub>2</sub> CdMgCl <sub>6</sub> | 0.930 | 0.461 | CsBaF <sub>3</sub>                  | 0.792 | 1.015 |
| Cs <sub>2</sub> CuZnBr <sub>6</sub> | 0.952 | 0.375 | Cs <sub>2</sub> CdCaBr <sub>6</sub> | 0.875 | 0.497 | CsBaI <sub>3</sub>                  | 0.771 | 0.614 |
| Cs <sub>2</sub> CuZnCl <sub>6</sub> | 0.967 | 0.406 | Cs <sub>2</sub> CdCaCl <sub>6</sub> | 0.884 | 0.539 | CsMnF <sub>3</sub>                  | 1.061 | 0.504 |
| Cs <sub>2</sub> CuPdBr <sub>6</sub> | 0.932 | 0.406 | Cs <sub>2</sub> CdSrBr <sub>6</sub> | 0.849 | 0.543 | CsMnI <sub>3</sub>                  | 0.953 | 0.305 |
| Cs <sub>2</sub> CuPdCl <sub>6</sub> | 0.945 | 0.439 | Cs <sub>2</sub> CdSrCl <sub>6</sub> | 0.856 | 0.588 | CsSnF <sub>3</sub>                  | 0.866 | 0.842 |
| Cs <sub>2</sub> CuIrBr <sub>6</sub> | 0.925 | 0.416 | Cs <sub>2</sub> CdBaBr <sub>6</sub> | 0.825 | 0.587 | CsSnI <sub>3</sub>                  | 0.824 | 0.509 |
| Cs <sub>2</sub> CuIrCl <sub>6</sub> | 0.937 | 0.45  | Cs <sub>2</sub> CdBaCl <sub>6</sub> | 0.831 | 0.635 | CsCoF <sub>3</sub>                  | 1.022 | 0.560 |
| Cs <sub>2</sub> CuPtBr <sub>6</sub> | 0.932 | 0.406 | Cs <sub>2</sub> CdMnBr <sub>6</sub> | 0.927 | 0.413 | CsCoI <sub>3</sub>                  | 0.929 | 0.339 |
| Cs <sub>2</sub> CuPtCl <sub>6</sub> | 0.945 | 0.439 | Cs <sub>2</sub> CdMnCl <sub>6</sub> | 0.939 | 0.448 | CsNiF <sub>3</sub>                  | 1.050 | 0.519 |
| Cs <sub>2</sub> CuTeBr <sub>6</sub> | 0.909 | 0.441 | Cs <sub>2</sub> CdFeBr <sub>6</sub> | 0.909 | 0.441 | CsNiI <sub>3</sub>                  | 0.947 | 0.314 |
| Cs <sub>2</sub> CuTeCl <sub>6</sub> | 0.920 | 0.478 | Cs <sub>2</sub> CdFeCl <sub>6</sub> | 0.920 | 0.478 | CsCuF <sub>3</sub>                  | 1.030 | 0.549 |
| Cs <sub>2</sub> ZnPdBr <sub>6</sub> | 0.930 | 0.408 | Cs <sub>2</sub> CdCoBr <sub>6</sub> | 0.914 | 0.432 | CsCuI <sub>3</sub>                  | 0.934 | 0.332 |
| Cs <sub>2</sub> ZnPdCl <sub>6</sub> | 0.943 | 0.442 | Cs <sub>2</sub> CdCoCl <sub>6</sub> | 0.926 | 0.468 | CsZnF <sub>3</sub>                  | 1.025 | 0.556 |
| Cs <sub>2</sub> ZnIrBr <sub>6</sub> | 0.923 | 0.418 | Cs <sub>2</sub> CdNiBr <sub>6</sub> | 0.923 | 0.418 | CsZnI <sub>3</sub>                  | 0.931 | 0.336 |
| Cs <sub>2</sub> ZnIrCl <sub>6</sub> | 0.936 | 0.453 | Cs <sub>2</sub> CdNiCl <sub>6</sub> | 0.936 | 0.453 | CsPdF <sub>3</sub>                  | 0.969 | 0.647 |
| Cs <sub>2</sub> ZnPtBr <sub>6</sub> | 0.930 | 0.408 | Cs <sub>2</sub> CdCuBr <sub>6</sub> | 0.917 | 0.429 | CsPdI <sub>3</sub>                  | 0.894 | 0.391 |
| Cs <sub>2</sub> ZnPtCl <sub>6</sub> | 0.943 | 0.442 | Cs <sub>2</sub> CdCuCl <sub>6</sub> | 0.929 | 0.464 | CsIrF <sub>3</sub>                  | 0.951 | 0.677 |
| Cs <sub>2</sub> ZnTeBr <sub>6</sub> | 0.907 | 0.444 | Cs <sub>2</sub> CdZnBr <sub>6</sub> | 0.915 | 0.431 | CsIrI <sub>3</sub>                  | 0.883 | 0.409 |
| Cs <sub>2</sub> ZnTeCl <sub>6</sub> | 0.918 | 0.481 | Cs <sub>2</sub> CdZnCl <sub>6</sub> | 0.927 | 0.467 | CsPtF <sub>3</sub>                  | 0.969 | 0.647 |
| Cs <sub>2</sub> PdIrBr <sub>6</sub> | 0.904 | 0.449 | Cs <sub>2</sub> CdPdBr <sub>6</sub> | 0.896 | 0.462 | CsPtI <sub>3</sub>                  | 0.894 | 0.391 |
| Cs <sub>2</sub> PdIrCl <sub>6</sub> | 0.915 | 0.486 | Cs <sub>2</sub> CdPdCl <sub>6</sub> | 0.906 | 0.500 | CsTeF <sub>3</sub>                  | 0.910 | 0.752 |
| Cs <sub>2</sub> PdPtBr <sub>6</sub> | 0.910 | 0.439 | Cs <sub>2</sub> CdIrBr <sub>6</sub> | 0.890 | 0.472 | CsTeI <sub>3</sub>                  | 0.855 | 0.455 |
| Cs <sub>2</sub> PdPtCl <sub>6</sub> | 0.922 | 0.475 | Cs <sub>2</sub> CdIrCl <sub>6</sub> | 0.900 | 0.511 | CsPbCl <sub>3</sub>                 | 0.820 | 0.657 |
| Cs <sub>2</sub> PdTeBr <sub>6</sub> | 0.888 | 0.474 | Cs <sub>2</sub> CdPtBr <sub>6</sub> | 0.896 | 0.462 | CsPbBr <sub>3</sub>                 | 0.815 | 0.607 |
| Cs <sub>2</sub> PdTeCl <sub>6</sub> | 0.898 | 0.514 | Cs <sub>2</sub> CdPtCl <sub>6</sub> | 0.906 | 0.500 | CsSnCl <sub>3</sub>                 | 0.840 | 0.619 |
| Cs <sub>2</sub> IrPtBr <sub>6</sub> | 0.904 | 0.449 | Cs <sub>2</sub> CdTeBr <sub>6</sub> | 0.875 | 0.497 | CsSnBr <sub>3</sub>                 | 0.833 | 0.571 |

| Material            | t     | u     | Material            | t     | u     |
|---------------------|-------|-------|---------------------|-------|-------|
| CsGeCl <sub>3</sub> | 0.969 | 0.403 | CsCuCl <sub>3</sub> | 0.969 | 0.403 |
| CsGeBr <sub>3</sub> | 0.954 | 0.372 | CsCuBr <sub>3</sub> | 0.954 | 0.372 |
| CsBeCl <sub>3</sub> | 1.089 | 0.249 | CsZnCl <sub>3</sub> | 0.965 | 0.409 |
| CsBeBr <sub>3</sub> | 1.065 | 0.230 | CsZnBr <sub>3</sub> | 0.951 | 0.378 |
| CsMgCl <sub>3</sub> | 0.973 | 0.398 | CsPdCl <sub>3</sub> | 0.922 | 0.475 |
| CsMgBr <sub>3</sub> | 0.958 | 0.367 | CsPdBr <sub>3</sub> | 0.910 | 0.439 |
| CsCaCl <sub>3</sub> | 0.876 | 0.552 | CsIrCl <sub>3</sub> | 0.908 | 0.497 |
| CsCaBr <sub>3</sub> | 0.867 | 0.510 | CsIrBr <sub>3</sub> | 0.897 | 0.459 |
| CsSrCl <sub>3</sub> | 0.823 | 0.652 | CsPtCl <sub>3</sub> | 0.922 | 0.475 |
| CsSrBr <sub>3</sub> | 0.817 | 0.602 | CsPtBr <sub>3</sub> | 0.910 | 0.439 |
| CsBaCl <sub>3</sub> | 0.779 | 0.746 | CsTeCl <sub>3</sub> | 0.876 | 0.552 |
| CsBaBr <sub>3</sub> | 0.775 | 0.689 | CsTeBr <sub>3</sub> | 0.867 | 0.510 |
| CsMnCl <sub>3</sub> | 0.992 | 0.370 |                     |       |       |
| CsMnBr <sub>3</sub> | 0.976 | 0.342 |                     |       |       |
| CsSnCl <sub>3</sub> | 0.84  | 0.619 |                     |       |       |
| CsSnBr <sub>3</sub> | 0.833 | 0.571 |                     |       |       |
| CsCoCl <sub>3</sub> | 0.963 | 0.412 |                     |       |       |
| CsCoBr <sub>3</sub> | 0.949 | 0.380 |                     |       |       |
| CsNiCl <sub>3</sub> | 0.984 | 0.381 |                     |       |       |
| CsNiBr <sub>3</sub> | 0.969 | 0.352 |                     |       |       |
| CsGeCl <sub>3</sub> | 0.969 | 0.403 |                     |       |       |
| CsGeBr <sub>3</sub> | 0.954 | 0.372 |                     |       |       |
| CsBeCl <sub>3</sub> | 1.089 | 0.249 |                     |       |       |
| CsBeBr <sub>3</sub> | 1.065 | 0.230 |                     |       |       |
| CsMgCl <sub>3</sub> | 0.973 | 0.398 |                     |       |       |
| CsMgBr <sub>3</sub> | 0.958 | 0.367 |                     |       |       |
| CsCaCl <sub>3</sub> | 0.876 | 0.552 |                     |       |       |
| CsCaBr <sub>3</sub> | 0.867 | 0.510 |                     |       |       |
| CsSrCl <sub>3</sub> | 0.823 | 0.652 |                     |       |       |
| CsSrBr <sub>3</sub> | 0.817 | 0.602 |                     |       |       |
| CsBaCl <sub>3</sub> | 0.779 | 0.746 |                     |       |       |
| CsBaBr <sub>3</sub> | 0.775 | 0.689 |                     |       |       |
| CsMnCl <sub>3</sub> | 0.992 | 0.370 |                     |       |       |
| CsMnBr <sub>3</sub> | 0.976 | 0.342 |                     |       |       |
| CsSnCl <sub>3</sub> | 0.840 | 0.619 |                     |       |       |
| CsSnBr <sub>3</sub> | 0.833 | 0.571 |                     |       |       |
| CsCoCl <sub>3</sub> | 0.963 | 0.412 |                     |       |       |
| CsCoBr <sub>3</sub> | 0.949 | 0.380 |                     |       |       |
| CsNiCl <sub>3</sub> | 0.984 | 0.381 |                     |       |       |
| CsNiBr <sub>3</sub> | 0.969 | 0.352 |                     |       |       |

**Table S4.** Goldschmidt tolerance factor range of inorganic double perovskites

| Material                            | $t_{\min}$ | $t_{\max}$ | Material                            | $t_{\min}$ | $t_{\max}$ | Material                            | $t_{\min}$ | $t_{\max}$ |
|-------------------------------------|------------|------------|-------------------------------------|------------|------------|-------------------------------------|------------|------------|
| Cs <sub>2</sub> PbSnF <sub>6</sub>  | 0.842      | 0.866      | Cs <sub>2</sub> PbMnBr <sub>6</sub> | 0.815      | 0.976      | Cs <sub>2</sub> SnPtF <sub>6</sub>  | 0.866      | 0.969      |
| Cs <sub>2</sub> PbGeF <sub>6</sub>  | 0.842      | 1.030      | Cs <sub>2</sub> PbFeBr <sub>6</sub> | 0.815      | 0.937      | Cs <sub>2</sub> SnTeF <sub>6</sub>  | 0.866      | 0.910      |
| Cs <sub>2</sub> PbBeF <sub>6</sub>  | 0.842      | 1.192      | Cs <sub>2</sub> PbCoBr <sub>6</sub> | 0.815      | 0.949      | Cs <sub>2</sub> SnGeCl <sub>6</sub> | 0.840      | 0.969      |
| Cs <sub>2</sub> PbMgF <sub>6</sub>  | 0.842      | 1.035      | Cs <sub>2</sub> PbNiBr <sub>6</sub> | 0.815      | 0.969      | Cs <sub>2</sub> SnBeCl <sub>6</sub> | 0.84       | 1.089      |
| Cs <sub>2</sub> PbCaF <sub>6</sub>  | 0.842      | 0.910      | Cs <sub>2</sub> PbCuBr <sub>6</sub> | 0.815      | 0.954      | Cs <sub>2</sub> SnMgCl <sub>6</sub> | 0.840      | 0.973      |
| Cs <sub>2</sub> PbSrF <sub>6</sub>  | 0.842      | 0.845      | Cs <sub>2</sub> PbZnBr <sub>6</sub> | 0.815      | 0.951      | Cs <sub>2</sub> SnCaCl <sub>6</sub> | 0.840      | 0.876      |
| Cs <sub>2</sub> PbMnF <sub>6</sub>  | 0.842      | 1.061      | Cs <sub>2</sub> PbPdBr <sub>6</sub> | 0.815      | 0.910      | Cs <sub>2</sub> SnSrCl <sub>6</sub> | 0.840      | 0.823      |
| Cs <sub>2</sub> PbFeF <sub>6</sub>  | 0.842      | 1.005      | Cs <sub>2</sub> PbIrBr <sub>6</sub> | 0.815      | 0.897      | Cs <sub>2</sub> SnBaCl <sub>6</sub> | 0.840      | 0.779      |
| Cs <sub>2</sub> PbCoF <sub>6</sub>  | 0.842      | 1.022      | Cs <sub>2</sub> PbPtBr <sub>6</sub> | 0.815      | 0.910      | Cs <sub>2</sub> SnMnCl <sub>6</sub> | 0.840      | 0.992      |
| Cs <sub>2</sub> PbNiF <sub>6</sub>  | 0.842      | 1.050      | Cs <sub>2</sub> PbTeBr <sub>6</sub> | 0.815      | 0.867      | Cs <sub>2</sub> SnFeCl <sub>6</sub> | 0.840      | 0.950      |
| Cs <sub>2</sub> PbCuF <sub>6</sub>  | 0.842      | 1.030      | Cs <sub>2</sub> PbSnI <sub>6</sub>  | 0.807      | 0.824      | Cs <sub>2</sub> SnCoCl <sub>6</sub> | 0.840      | 0.963      |
| Cs <sub>2</sub> PbZnF <sub>6</sub>  | 0.842      | 1.025      | Cs <sub>2</sub> PbGeI <sub>6</sub>  | 0.807      | 0.934      | Cs <sub>2</sub> SnNiCl <sub>6</sub> | 0.840      | 0.984      |
| Cs <sub>2</sub> PbPdF <sub>6</sub>  | 0.842      | 0.969      | Cs <sub>2</sub> PbBeI <sub>6</sub>  | 0.807      | 1.033      | Cs <sub>2</sub> SnCuCl <sub>6</sub> | 0.840      | 0.969      |
| Cs <sub>2</sub> PbIrF <sub>6</sub>  | 0.842      | 0.951      | Cs <sub>2</sub> PbMgI <sub>6</sub>  | 0.807      | 0.937      | Cs <sub>2</sub> SnZnCl <sub>6</sub> | 0.840      | 0.965      |
| Cs <sub>2</sub> PbPtF <sub>6</sub>  | 0.842      | 0.969      | Cs <sub>2</sub> PbCaI <sub>6</sub>  | 0.807      | 0.855      | Cs <sub>2</sub> SnPdCl <sub>6</sub> | 0.840      | 0.922      |
| Cs <sub>2</sub> PbTeF <sub>6</sub>  | 0.842      | 0.910      | Cs <sub>2</sub> PbSrI <sub>6</sub>  | 0.807      | 0.810      | Cs <sub>2</sub> SnIrCl <sub>6</sub> | 0.840      | 0.908      |
| Cs <sub>2</sub> PbSnCl <sub>6</sub> | 0.820      | 0.840      | Cs <sub>2</sub> PbBaI <sub>6</sub>  | 0.807      | 0.771      | Cs <sub>2</sub> SnPtCl <sub>6</sub> | 0.840      | 0.922      |
| Cs <sub>2</sub> PbGeCl <sub>6</sub> | 0.820      | 0.969      | Cs <sub>2</sub> PbMnI <sub>6</sub>  | 0.807      | 0.953      | Cs <sub>2</sub> SnTeCl <sub>6</sub> | 0.840      | 0.876      |
| Cs <sub>2</sub> PbBeCl <sub>6</sub> | 0.820      | 1.089      | Cs <sub>2</sub> PbFeI <sub>6</sub>  | 0.807      | 0.918      | Cs <sub>2</sub> SnGeBr <sub>6</sub> | 0.833      | 0.954      |
| Cs <sub>2</sub> PbMgCl <sub>6</sub> | 0.820      | 0.973      | Cs <sub>2</sub> PbCoI <sub>6</sub>  | 0.807      | 0.929      | Cs <sub>2</sub> SnBeBr <sub>6</sub> | 0.833      | 1.065      |
| Cs <sub>2</sub> PbCaCl <sub>6</sub> | 0.820      | 0.876      | Cs <sub>2</sub> PbNiI <sub>6</sub>  | 0.807      | 0.947      | Cs <sub>2</sub> SnMgBr <sub>6</sub> | 0.833      | 0.958      |
| Cs <sub>2</sub> PbSrCl <sub>6</sub> | 0.820      | 0.823      | Cs <sub>2</sub> PbCuI <sub>6</sub>  | 0.807      | 0.934      | Cs <sub>2</sub> SnCaBr <sub>6</sub> | 0.833      | 0.867      |
| Cs <sub>2</sub> PbBaCl <sub>6</sub> | 0.820      | 0.779      | Cs <sub>2</sub> PbZnI <sub>6</sub>  | 0.807      | 0.931      | Cs <sub>2</sub> SnSrBr <sub>6</sub> | 0.833      | 0.817      |
| Cs <sub>2</sub> PbMnCl <sub>6</sub> | 0.820      | 0.992      | Cs <sub>2</sub> PbPdI <sub>6</sub>  | 0.807      | 0.894      | Cs <sub>2</sub> SnBaBr <sub>6</sub> | 0.833      | 0.775      |
| Cs <sub>2</sub> PbFeCl <sub>6</sub> | 0.820      | 0.950      | Cs <sub>2</sub> PbIrI <sub>6</sub>  | 0.807      | 0.883      | Cs <sub>2</sub> SnMnBr <sub>6</sub> | 0.833      | 0.976      |
| Cs <sub>2</sub> PbCoCl <sub>6</sub> | 0.820      | 0.963      | Cs <sub>2</sub> PbPtI <sub>6</sub>  | 0.807      | 0.894      | Cs <sub>2</sub> SnFeBr <sub>6</sub> | 0.833      | 0.937      |
| Cs <sub>2</sub> PbNiCl <sub>6</sub> | 0.820      | 0.984      | Cs <sub>2</sub> PbTeI <sub>6</sub>  | 0.807      | 0.855      | Cs <sub>2</sub> SnCoBr <sub>6</sub> | 0.833      | 0.949      |
| Cs <sub>2</sub> PbCuCl <sub>6</sub> | 0.820      | 0.969      | Cs <sub>2</sub> SnGeF <sub>6</sub>  | 0.866      | 1.030      | Cs <sub>2</sub> SnNiBr <sub>6</sub> | 0.833      | 0.969      |
| Cs <sub>2</sub> PbZnCl <sub>6</sub> | 0.820      | 0.965      | Cs <sub>2</sub> SnBeF <sub>6</sub>  | 0.866      | 1.192      | Cs <sub>2</sub> SnCuBr <sub>6</sub> | 0.833      | 0.954      |
| Cs <sub>2</sub> PbPdCl <sub>6</sub> | 0.820      | 0.922      | Cs <sub>2</sub> SnMgF <sub>6</sub>  | 0.866      | 1.035      | Cs <sub>2</sub> SnZnBr <sub>6</sub> | 0.833      | 0.951      |
| Cs <sub>2</sub> PbIrCl <sub>6</sub> | 0.820      | 0.908      | Cs <sub>2</sub> SnCaF <sub>6</sub>  | 0.866      | 0.910      | Cs <sub>2</sub> SnPdBr <sub>6</sub> | 0.833      | 0.910      |
| Cs <sub>2</sub> PbPtCl <sub>6</sub> | 0.820      | 0.922      | Cs <sub>2</sub> SnSrF <sub>6</sub>  | 0.866      | 0.845      | Cs <sub>2</sub> SnIrBr <sub>6</sub> | 0.833      | 0.897      |
| Cs <sub>2</sub> PbTeCl <sub>6</sub> | 0.820      | 0.876      | Cs <sub>2</sub> SnMnF <sub>6</sub>  | 0.866      | 1.061      | Cs <sub>2</sub> SnPtBr <sub>6</sub> | 0.833      | 0.910      |
| Cs <sub>2</sub> PbSnBr <sub>6</sub> | 0.815      | 0.833      | Cs <sub>2</sub> SnFeF <sub>6</sub>  | 0.866      | 1.005      | Cs <sub>2</sub> SnTeBr <sub>6</sub> | 0.833      | 0.867      |
| Cs <sub>2</sub> PbGeBr <sub>6</sub> | 0.815      | 0.954      | Cs <sub>2</sub> SnCoF <sub>6</sub>  | 0.866      | 1.022      | Cs <sub>2</sub> SnGeI <sub>6</sub>  | 0.824      | 0.934      |
| Cs <sub>2</sub> PbBeBr <sub>6</sub> | 0.815      | 1.065      | Cs <sub>2</sub> SnNiF <sub>6</sub>  | 0.866      | 1.050      | Cs <sub>2</sub> SnBeI <sub>6</sub>  | 0.824      | 1.033      |
| Cs <sub>2</sub> PbMgBr <sub>6</sub> | 0.815      | 0.958      | Cs <sub>2</sub> SnCuF <sub>6</sub>  | 0.866      | 1.030      | Cs <sub>2</sub> SnMgI <sub>6</sub>  | 0.824      | 0.937      |
| Cs <sub>2</sub> PbCaBr <sub>6</sub> | 0.815      | 0.867      | Cs <sub>2</sub> SnZnF <sub>6</sub>  | 0.866      | 1.025      | Cs <sub>2</sub> SnCaI <sub>6</sub>  | 0.824      | 0.855      |
| Cs <sub>2</sub> PbSrBr <sub>6</sub> | 0.815      | 0.817      | Cs <sub>2</sub> SnPdF <sub>6</sub>  | 0.866      | 0.969      | Cs <sub>2</sub> SnSrI <sub>6</sub>  | 0.824      | 0.810      |
| Cs <sub>2</sub> PbBaBr <sub>6</sub> | 0.815      | 0.775      | Cs <sub>2</sub> SnIrF <sub>6</sub>  | 0.866      | 0.951      | Cs <sub>2</sub> SnBaI <sub>6</sub>  | 0.824      | 0.771      |

| Material                            | $t_{\min}$ | $t_{\max}$ | Material                            | $t_{\min}$ | $t_{\max}$ | Material                            | $t_{\min}$ | $t_{\max}$ |
|-------------------------------------|------------|------------|-------------------------------------|------------|------------|-------------------------------------|------------|------------|
| Cs <sub>2</sub> SnMnI <sub>6</sub>  | 0.824      | 0.953      | Cs <sub>2</sub> GeBeBr <sub>6</sub> | 0.954      | 1.065      | Cs <sub>2</sub> BePdF <sub>6</sub>  | 0.969      | 1.192      |
| Cs <sub>2</sub> SnFeI <sub>6</sub>  | 0.824      | 0.918      | Cs <sub>2</sub> GeMgBr <sub>6</sub> | 0.954      | 0.958      | Cs <sub>2</sub> BeIrF <sub>6</sub>  | 0.951      | 1.192      |
| Cs <sub>2</sub> SnCoI <sub>6</sub>  | 0.824      | 0.929      | Cs <sub>2</sub> GeCaBr <sub>6</sub> | 0.954      | 0.867      | Cs <sub>2</sub> BePtF <sub>6</sub>  | 0.969      | 1.192      |
| Cs <sub>2</sub> SnNiI <sub>6</sub>  | 0.824      | 0.947      | Cs <sub>2</sub> GeSrBr <sub>6</sub> | 0.954      | 0.817      | Cs <sub>2</sub> BeTeF <sub>6</sub>  | 0.910      | 1.192      |
| Cs <sub>2</sub> SnCuI <sub>6</sub>  | 0.824      | 0.934      | Cs <sub>2</sub> GeBaBr <sub>6</sub> | 0.954      | 0.775      | Cs <sub>2</sub> BeMgCl <sub>6</sub> | 0.973      | 1.089      |
| Cs <sub>2</sub> SnZnI <sub>6</sub>  | 0.824      | 0.931      | Cs <sub>2</sub> GeMnBr <sub>6</sub> | 0.954      | 0.976      | Cs <sub>2</sub> BeCaCl <sub>6</sub> | 0.876      | 1.089      |
| Cs <sub>2</sub> SnPdI <sub>6</sub>  | 0.824      | 0.894      | Cs <sub>2</sub> GeFeBr <sub>6</sub> | 0.954      | 0.937      | Cs <sub>2</sub> BeSrCl <sub>6</sub> | 0.823      | 1.089      |
| Cs <sub>2</sub> SnIrI <sub>6</sub>  | 0.824      | 0.883      | Cs <sub>2</sub> GeCoBr <sub>6</sub> | 0.954      | 0.949      | Cs <sub>2</sub> BeBaCl <sub>6</sub> | 0.779      | 1.089      |
| Cs <sub>2</sub> SnPtI <sub>6</sub>  | 0.824      | 0.894      | Cs <sub>2</sub> GeNiBr <sub>6</sub> | 0.954      | 0.969      | Cs <sub>2</sub> BeMnCl <sub>6</sub> | 0.992      | 1.089      |
| Cs <sub>2</sub> SnTeI <sub>6</sub>  | 0.824      | 0.855      | Cs <sub>2</sub> GeCuBr <sub>6</sub> | 0.954      | 0.954      | Cs <sub>2</sub> BeFeCl <sub>6</sub> | 0.950      | 1.089      |
| Cs <sub>2</sub> GeBeF <sub>6</sub>  | 1.030      | 1.192      | Cs <sub>2</sub> GeZnBr <sub>6</sub> | 0.954      | 0.951      | Cs <sub>2</sub> BeCoCl <sub>6</sub> | 0.963      | 1.089      |
| Cs <sub>2</sub> GeMgF <sub>6</sub>  | 1.030      | 1.035      | Cs <sub>2</sub> GePdBr <sub>6</sub> | 0.954      | 0.910      | Cs <sub>2</sub> BeNiCl <sub>6</sub> | 0.984      | 1.089      |
| Cs <sub>2</sub> GeCaF <sub>6</sub>  | 1.030      | 0.910      | Cs <sub>2</sub> GeIrBr <sub>6</sub> | 0.954      | 0.897      | Cs <sub>2</sub> BeCuCl <sub>6</sub> | 0.969      | 1.089      |
| Cs <sub>2</sub> GeSrF <sub>6</sub>  | 1.030      | 0.845      | Cs <sub>2</sub> GePtBr <sub>6</sub> | 0.954      | 0.910      | Cs <sub>2</sub> BeZnCl <sub>6</sub> | 0.965      | 1.089      |
| Cs <sub>2</sub> GeBaF <sub>6</sub>  | 1.030      | 0.792      | Cs <sub>2</sub> GeTeBr <sub>6</sub> | 0.954      | 0.867      | Cs <sub>2</sub> BePdCl <sub>6</sub> | 0.922      | 1.089      |
| Cs <sub>2</sub> GeMnF <sub>6</sub>  | 1.030      | 1.061      | Cs <sub>2</sub> GeBeI <sub>6</sub>  | 0.934      | 1.033      | Cs <sub>2</sub> BeIrCl <sub>6</sub> | 0.908      | 1.089      |
| Cs <sub>2</sub> GeFeF <sub>6</sub>  | 1.030      | 1.005      | Cs <sub>2</sub> GeMgI <sub>6</sub>  | 0.934      | 0.937      | Cs <sub>2</sub> BePtCl <sub>6</sub> | 0.922      | 1.089      |
| Cs <sub>2</sub> GeCoF <sub>6</sub>  | 1.030      | 1.022      | Cs <sub>2</sub> GeCaI <sub>6</sub>  | 0.934      | 0.855      | Cs <sub>2</sub> BeTeCl <sub>6</sub> | 0.876      | 1.089      |
| Cs <sub>2</sub> GeNiF <sub>6</sub>  | 1.030      | 1.050      | Cs <sub>2</sub> GeSrI <sub>6</sub>  | 0.934      | 0.810      | Cs <sub>2</sub> BeMgBr <sub>6</sub> | 0.958      | 1.065      |
| Cs <sub>2</sub> GeCuF <sub>6</sub>  | 1.030      | 1.030      | Cs <sub>2</sub> GeBaI <sub>6</sub>  | 0.934      | 0.771      | Cs <sub>2</sub> BeCaBr <sub>6</sub> | 0.867      | 1.065      |
| Cs <sub>2</sub> GeZnF <sub>6</sub>  | 1.030      | 1.025      | Cs <sub>2</sub> GeMnI <sub>6</sub>  | 0.934      | 0.953      | Cs <sub>2</sub> BeSrBr <sub>6</sub> | 0.817      | 1.065      |
| Cs <sub>2</sub> GePdF <sub>6</sub>  | 1.030      | 0.969      | Cs <sub>2</sub> GeFeI <sub>6</sub>  | 0.934      | 0.918      | Cs <sub>2</sub> BeBaBr <sub>6</sub> | 0.775      | 1.065      |
| Cs <sub>2</sub> GeIrF <sub>6</sub>  | 1.030      | 0.951      | Cs <sub>2</sub> GeCoI <sub>6</sub>  | 0.934      | 0.929      | Cs <sub>2</sub> BeMnBr <sub>6</sub> | 0.976      | 1.065      |
| Cs <sub>2</sub> GePtF <sub>6</sub>  | 1.030      | 0.969      | Cs <sub>2</sub> GeNiI <sub>6</sub>  | 0.934      | 0.947      | Cs <sub>2</sub> BeFeBr <sub>6</sub> | 0.937      | 1.065      |
| Cs <sub>2</sub> GeTeF <sub>6</sub>  | 1.030      | 0.910      | Cs <sub>2</sub> GeCuI <sub>6</sub>  | 0.934      | 0.934      | Cs <sub>2</sub> BeCoBr <sub>6</sub> | 0.949      | 1.065      |
| Cs <sub>2</sub> GeBeCl <sub>6</sub> | 0.969      | 1.089      | Cs <sub>2</sub> GeZnI <sub>6</sub>  | 0.934      | 0.931      | Cs <sub>2</sub> BeNiBr <sub>6</sub> | 0.969      | 1.065      |
| Cs <sub>2</sub> GeMgCl <sub>6</sub> | 0.969      | 0.973      | Cs <sub>2</sub> GePdI <sub>6</sub>  | 0.934      | 0.894      | Cs <sub>2</sub> BeCuBr <sub>6</sub> | 0.954      | 1.065      |
| Cs <sub>2</sub> GeCaCl <sub>6</sub> | 0.969      | 0.876      | Cs <sub>2</sub> GeIrI <sub>6</sub>  | 0.934      | 0.883      | Cs <sub>2</sub> BeZnBr <sub>6</sub> | 0.951      | 1.065      |
| Cs <sub>2</sub> GeSrCl <sub>6</sub> | 0.969      | 0.823      | Cs <sub>2</sub> GePtI <sub>6</sub>  | 0.934      | 0.894      | Cs <sub>2</sub> BePdBr <sub>6</sub> | 0.910      | 1.065      |
| Cs <sub>2</sub> GeBaCl <sub>6</sub> | 0.969      | 0.779      | Cs <sub>2</sub> GeTeI <sub>6</sub>  | 0.934      | 0.855      | Cs <sub>2</sub> BeIrBr <sub>6</sub> | 0.897      | 1.065      |
| Cs <sub>2</sub> GeMnCl <sub>6</sub> | 0.969      | 0.992      | Cs <sub>2</sub> BeMgF <sub>6</sub>  | 1.035      | 1.192      | Cs <sub>2</sub> BePtBr <sub>6</sub> | 0.910      | 1.065      |
| Cs <sub>2</sub> GeFeCl <sub>6</sub> | 0.969      | 0.950      | Cs <sub>2</sub> BeCaF <sub>6</sub>  | 0.910      | 1.192      | Cs <sub>2</sub> BeTeBr <sub>6</sub> | 0.867      | 1.065      |
| Cs <sub>2</sub> GeCoCl <sub>6</sub> | 0.969      | 0.963      | Cs <sub>2</sub> BeSrF <sub>6</sub>  | 0.845      | 1.192      | Cs <sub>2</sub> BeMgI <sub>6</sub>  | 0.937      | 1.033      |
| Cs <sub>2</sub> GeNiCl <sub>6</sub> | 0.969      | 0.984      | Cs <sub>2</sub> BeBaF <sub>6</sub>  | 0.792      | 1.192      | Cs <sub>2</sub> BeCaI <sub>6</sub>  | 0.855      | 1.033      |
| Cs <sub>2</sub> GeCuCl <sub>6</sub> | 0.969      | 0.969      | Cs <sub>2</sub> BeMnF <sub>6</sub>  | 1.061      | 1.192      | Cs <sub>2</sub> BeSrI <sub>6</sub>  | 0.810      | 1.033      |
| Cs <sub>2</sub> GeZnCl <sub>6</sub> | 0.969      | 0.965      | Cs <sub>2</sub> BeFeF <sub>6</sub>  | 1.005      | 1.192      | Cs <sub>2</sub> BeBaI <sub>6</sub>  | 0.771      | 1.033      |
| Cs <sub>2</sub> GePdCl <sub>6</sub> | 0.969      | 0.922      | Cs <sub>2</sub> BeCoF <sub>6</sub>  | 1.022      | 1.192      | Cs <sub>2</sub> BeMnI <sub>6</sub>  | 0.953      | 1.033      |
| Cs <sub>2</sub> GeIrCl <sub>6</sub> | 0.969      | 0.908      | Cs <sub>2</sub> BeNiF <sub>6</sub>  | 1.050      | 1.192      | Cs <sub>2</sub> BeFeI <sub>6</sub>  | 0.918      | 1.033      |
| Cs <sub>2</sub> GePtCl <sub>6</sub> | 0.969      | 0.922      | Cs <sub>2</sub> BeCuF <sub>6</sub>  | 1.030      | 1.192      | Cs <sub>2</sub> BeCoI <sub>6</sub>  | 0.929      | 1.033      |
| Cs <sub>2</sub> GeTeCl <sub>6</sub> | 0.969      | 0.876      | Cs <sub>2</sub> BeZnF <sub>6</sub>  | 1.025      | 1.192      | Cs <sub>2</sub> BeNiI <sub>6</sub>  | 0.947      | 1.033      |

| Material                            | $t_{\min}$ | $t_{\max}$ | Material                            | $t_{\min}$ | $t_{\max}$ | Material                            | $t_{\min}$ | $t_{\max}$ |
|-------------------------------------|------------|------------|-------------------------------------|------------|------------|-------------------------------------|------------|------------|
| Cs <sub>2</sub> BeCuI <sub>6</sub>  | 0.934      | 1.033      | Cs <sub>2</sub> MgZnBr <sub>6</sub> | 0.951      | 0.958      | Cs <sub>2</sub> CaPtCl <sub>6</sub> | 0.876      | 0.922      |
| Cs <sub>2</sub> BeZnI <sub>6</sub>  | 0.931      | 1.033      | Cs <sub>2</sub> MgPdBr <sub>6</sub> | 0.91       | 0.958      | Cs <sub>2</sub> CaTeCl <sub>6</sub> | 0.876      | 0.876      |
| Cs <sub>2</sub> BePdI <sub>6</sub>  | 0.894      | 1.033      | Cs <sub>2</sub> MgIrBr <sub>6</sub> | 0.897      | 0.958      | Cs <sub>2</sub> CaSrBr <sub>6</sub> | 0.817      | 0.867      |
| Cs <sub>2</sub> BeIrI <sub>6</sub>  | 0.883      | 1.033      | Cs <sub>2</sub> MgPtBr <sub>6</sub> | 0.91       | 0.958      | Cs <sub>2</sub> CaBaBr <sub>6</sub> | 0.775      | 0.867      |
| Cs <sub>2</sub> BePtI <sub>6</sub>  | 0.894      | 1.033      | Cs <sub>2</sub> MgTeBr <sub>6</sub> | 0.867      | 0.958      | Cs <sub>2</sub> CaMnBr <sub>6</sub> | 0.867      | 0.976      |
| Cs <sub>2</sub> BeTeI <sub>6</sub>  | 0.855      | 1.033      | Cs <sub>2</sub> MgCaI <sub>6</sub>  | 0.855      | 0.937      | Cs <sub>2</sub> CaFeBr <sub>6</sub> | 0.867      | 0.937      |
| Cs <sub>2</sub> MgCaF <sub>6</sub>  | 0.910      | 1.035      | Cs <sub>2</sub> MgSrI <sub>6</sub>  | 0.81       | 0.937      | Cs <sub>2</sub> CaCoBr <sub>6</sub> | 0.867      | 0.949      |
| Cs <sub>2</sub> MgSrF <sub>6</sub>  | 0.845      | 1.035      | Cs <sub>2</sub> MgBaI <sub>6</sub>  | 0.771      | 0.937      | Cs <sub>2</sub> CaNiBr <sub>6</sub> | 0.867      | 0.969      |
| Cs <sub>2</sub> MgBaF <sub>6</sub>  | 0.792      | 1.035      | Cs <sub>2</sub> MgMnI <sub>6</sub>  | 0.953      | 0.937      | Cs <sub>2</sub> CaCuBr <sub>6</sub> | 0.867      | 0.954      |
| Cs <sub>2</sub> MgMnF <sub>6</sub>  | 1.061      | 1.035      | Cs <sub>2</sub> MgFeI <sub>6</sub>  | 0.918      | 0.937      | Cs <sub>2</sub> CaZnBr <sub>6</sub> | 0.867      | 0.951      |
| Cs <sub>2</sub> MgFeF <sub>6</sub>  | 1.005      | 1.035      | Cs <sub>2</sub> MgCoI <sub>6</sub>  | 0.929      | 0.937      | Cs <sub>2</sub> CaPdBr <sub>6</sub> | 0.867      | 0.910      |
| Cs <sub>2</sub> MgCoF <sub>6</sub>  | 1.022      | 1.035      | Cs <sub>2</sub> MgNiI <sub>6</sub>  | 0.947      | 0.937      | Cs <sub>2</sub> CaIrBr <sub>6</sub> | 0.867      | 0.897      |
| Cs <sub>2</sub> MgNiF <sub>6</sub>  | 1.050      | 1.035      | Cs <sub>2</sub> MgCuI <sub>6</sub>  | 0.934      | 0.937      | Cs <sub>2</sub> CaPtBr <sub>6</sub> | 0.867      | 0.910      |
| Cs <sub>2</sub> MgCuF <sub>6</sub>  | 1.030      | 1.035      | Cs <sub>2</sub> MgZnI <sub>6</sub>  | 0.931      | 0.937      | Cs <sub>2</sub> CaTeBr <sub>6</sub> | 0.867      | 0.867      |
| Cs <sub>2</sub> MgZnF <sub>6</sub>  | 1.025      | 1.035      | Cs <sub>2</sub> MgPdI <sub>6</sub>  | 0.894      | 0.937      | Cs <sub>2</sub> CaSrI <sub>6</sub>  | 0.810      | 0.855      |
| Cs <sub>2</sub> MgPdF <sub>6</sub>  | 0.969      | 1.035      | Cs <sub>2</sub> MgIrI <sub>6</sub>  | 0.883      | 0.937      | Cs <sub>2</sub> CaBaI <sub>6</sub>  | 0.771      | 0.855      |
| Cs <sub>2</sub> MgIrF <sub>6</sub>  | 0.951      | 1.035      | Cs <sub>2</sub> MgPtI <sub>6</sub>  | 0.894      | 0.937      | Cs <sub>2</sub> CaMnI <sub>6</sub>  | 0.855      | 0.953      |
| Cs <sub>2</sub> MgPtF <sub>6</sub>  | 0.969      | 1.035      | Cs <sub>2</sub> MgTeI <sub>6</sub>  | 0.855      | 0.937      | Cs <sub>2</sub> CaFeI <sub>6</sub>  | 0.855      | 0.918      |
| Cs <sub>2</sub> MgTeF <sub>6</sub>  | 0.910      | 1.035      | Cs <sub>2</sub> CaSrF <sub>6</sub>  | 0.845      | 0.910      | Cs <sub>2</sub> CaCoI <sub>6</sub>  | 0.855      | 0.929      |
| Cs <sub>2</sub> MgCaCl <sub>6</sub> | 0.876      | 0.973      | Cs <sub>2</sub> CaBaF <sub>6</sub>  | 0.792      | 0.910      | Cs <sub>2</sub> CaNiI <sub>6</sub>  | 0.855      | 0.947      |
| Cs <sub>2</sub> MgSrCl <sub>6</sub> | 0.823      | 0.973      | Cs <sub>2</sub> CaMnF <sub>6</sub>  | 0.910      | 1.061      | Cs <sub>2</sub> CaCuI <sub>6</sub>  | 0.855      | 0.934      |
| Cs <sub>2</sub> MgBaCl <sub>6</sub> | 0.779      | 0.973      | Cs <sub>2</sub> CaFeF <sub>6</sub>  | 0.910      | 1.005      | Cs <sub>2</sub> CaZnI <sub>6</sub>  | 0.855      | 0.931      |
| Cs <sub>2</sub> MgMnCl <sub>6</sub> | 0.992      | 0.973      | Cs <sub>2</sub> CaCoF <sub>6</sub>  | 0.910      | 1.022      | Cs <sub>2</sub> CaPdI <sub>6</sub>  | 0.855      | 0.894      |
| Cs <sub>2</sub> MgFeCl <sub>6</sub> | 0.950      | 0.973      | Cs <sub>2</sub> CaNiF <sub>6</sub>  | 0.910      | 1.050      | Cs <sub>2</sub> CaIrI <sub>6</sub>  | 0.855      | 0.883      |
| Cs <sub>2</sub> MgCoCl <sub>6</sub> | 0.963      | 0.973      | Cs <sub>2</sub> CaCuF <sub>6</sub>  | 0.910      | 1.030      | Cs <sub>2</sub> CaPtI <sub>6</sub>  | 0.855      | 0.894      |
| Cs <sub>2</sub> MgNiCl <sub>6</sub> | 0.984      | 0.973      | Cs <sub>2</sub> CaZnF <sub>6</sub>  | 0.910      | 1.025      | Cs <sub>2</sub> CaTeI <sub>6</sub>  | 0.855      | 0.855      |
| Cs <sub>2</sub> MgCuCl <sub>6</sub> | 0.969      | 0.973      | Cs <sub>2</sub> CaPdF <sub>6</sub>  | 0.910      | 0.969      | Cs <sub>2</sub> SrMnF <sub>6</sub>  | 0.845      | 1.061      |
| Cs <sub>2</sub> MgZnCl <sub>6</sub> | 0.965      | 0.973      | Cs <sub>2</sub> CaIrF <sub>6</sub>  | 0.910      | 0.951      | Cs <sub>2</sub> SrFeF <sub>6</sub>  | 0.845      | 1.005      |
| Cs <sub>2</sub> MgPdCl <sub>6</sub> | 0.922      | 0.973      | Cs <sub>2</sub> CaPtF <sub>6</sub>  | 0.910      | 0.969      | Cs <sub>2</sub> SrCoF <sub>6</sub>  | 0.845      | 1.022      |
| Cs <sub>2</sub> MgIrCl <sub>6</sub> | 0.908      | 0.973      | Cs <sub>2</sub> CaTeF <sub>6</sub>  | 0.910      | 0.910      | Cs <sub>2</sub> SrNiF <sub>6</sub>  | 0.845      | 1.050      |
| Cs <sub>2</sub> MgPtCl <sub>6</sub> | 0.922      | 0.973      | Cs <sub>2</sub> CaSrCl <sub>6</sub> | 0.823      | 0.876      | Cs <sub>2</sub> SrCuF <sub>6</sub>  | 0.845      | 1.030      |
| Cs <sub>2</sub> MgTeCl <sub>6</sub> | 0.876      | 0.973      | Cs <sub>2</sub> CaBaCl <sub>6</sub> | 0.779      | 0.876      | Cs <sub>2</sub> SrZnF <sub>6</sub>  | 0.845      | 1.025      |
| Cs <sub>2</sub> MgCaBr <sub>6</sub> | 0.867      | 0.958      | Cs <sub>2</sub> CaMnCl <sub>6</sub> | 0.876      | 0.992      | Cs <sub>2</sub> SrPdF <sub>6</sub>  | 0.845      | 0.969      |
| Cs <sub>2</sub> MgSrBr <sub>6</sub> | 0.817      | 0.958      | Cs <sub>2</sub> CaFeCl <sub>6</sub> | 0.876      | 0.950      | Cs <sub>2</sub> SrIrF <sub>6</sub>  | 0.845      | 0.951      |
| Cs <sub>2</sub> MgBaBr <sub>6</sub> | 0.775      | 0.958      | Cs <sub>2</sub> CaCoCl <sub>6</sub> | 0.876      | 0.963      | Cs <sub>2</sub> SrPtF <sub>6</sub>  | 0.845      | 0.969      |
| Cs <sub>2</sub> MgMnBr <sub>6</sub> | 0.976      | 0.958      | Cs <sub>2</sub> CaNiCl <sub>6</sub> | 0.876      | 0.984      | Cs <sub>2</sub> SrTeF <sub>6</sub>  | 0.845      | 0.910      |
| Cs <sub>2</sub> MgFeBr <sub>6</sub> | 0.937      | 0.958      | Cs <sub>2</sub> CaCuCl <sub>6</sub> | 0.876      | 0.969      | Cs <sub>2</sub> SrBaCl <sub>6</sub> | 0.779      | 0.823      |
| Cs <sub>2</sub> MgCoBr <sub>6</sub> | 0.949      | 0.958      | Cs <sub>2</sub> CaZnCl <sub>6</sub> | 0.876      | 0.965      | Cs <sub>2</sub> SrMnCl <sub>6</sub> | 0.823      | 0.992      |
| Cs <sub>2</sub> MgNiBr <sub>6</sub> | 0.969      | 0.958      | Cs <sub>2</sub> CaPdCl <sub>6</sub> | 0.876      | 0.922      | Cs <sub>2</sub> SrFeCl <sub>6</sub> | 0.823      | 0.950      |
| Cs <sub>2</sub> MgCuBr <sub>6</sub> | 0.954      | 0.958      | Cs <sub>2</sub> CaIrCl <sub>6</sub> | 0.876      | 0.908      | Cs <sub>2</sub> SrCoCl <sub>6</sub> | 0.823      | 0.963      |



| Material                            | $t_{\min}$ | $t_{\max}$ | Material                            | $t_{\min}$ | $t_{\max}$ | Material                            | $t_{\min}$ | $t_{\max}$ |
|-------------------------------------|------------|------------|-------------------------------------|------------|------------|-------------------------------------|------------|------------|
| Cs <sub>2</sub> SrNiCl <sub>6</sub> | 0.823      | 0.984      | Cs <sub>2</sub> BaFeCl <sub>6</sub> | 0.779      | 0.95       | Cs <sub>2</sub> MnNiCl <sub>6</sub> | 0.984      | 0.992      |
| Cs <sub>2</sub> SrCuCl <sub>6</sub> | 0.823      | 0.969      | Cs <sub>2</sub> BaCoCl <sub>6</sub> | 0.779      | 0.963      | Cs <sub>2</sub> MnCuCl <sub>6</sub> | 0.969      | 0.992      |
| Cs <sub>2</sub> SrZnCl <sub>6</sub> | 0.823      | 0.965      | Cs <sub>2</sub> BaNiCl <sub>6</sub> | 0.779      | 0.984      | Cs <sub>2</sub> MnZnCl <sub>6</sub> | 0.965      | 0.992      |
| Cs <sub>2</sub> SrPdCl <sub>6</sub> | 0.823      | 0.922      | Cs <sub>2</sub> BaCuCl <sub>6</sub> | 0.779      | 0.969      | Cs <sub>2</sub> MnPdCl <sub>6</sub> | 0.922      | 0.992      |
| Cs <sub>2</sub> SrIrCl <sub>6</sub> | 0.823      | 0.908      | Cs <sub>2</sub> BaZnCl <sub>6</sub> | 0.779      | 0.965      | Cs <sub>2</sub> MnIrCl <sub>6</sub> | 0.908      | 0.992      |
| Cs <sub>2</sub> SrPtCl <sub>6</sub> | 0.823      | 0.922      | Cs <sub>2</sub> BaPdCl <sub>6</sub> | 0.779      | 0.922      | Cs <sub>2</sub> MnPtCl <sub>6</sub> | 0.922      | 0.992      |
| Cs <sub>2</sub> SrTeCl <sub>6</sub> | 0.823      | 0.876      | Cs <sub>2</sub> BaIrCl <sub>6</sub> | 0.779      | 0.908      | Cs <sub>2</sub> MnTeCl <sub>6</sub> | 0.876      | 0.992      |
| Cs <sub>2</sub> SrBaBr <sub>6</sub> | 0.775      | 0.817      | Cs <sub>2</sub> BaPtCl <sub>6</sub> | 0.779      | 0.922      | Cs <sub>2</sub> MnFeBr <sub>6</sub> | 0.937      | 0.976      |
| Cs <sub>2</sub> SrMnBr <sub>6</sub> | 0.817      | 0.976      | Cs <sub>2</sub> BaTeCl <sub>6</sub> | 0.779      | 0.876      | Cs <sub>2</sub> MnCoBr <sub>6</sub> | 0.949      | 0.976      |
| Cs <sub>2</sub> SrFeBr <sub>6</sub> | 0.817      | 0.937      | Cs <sub>2</sub> BaMnBr <sub>6</sub> | 0.775      | 0.976      | Cs <sub>2</sub> MnNiBr <sub>6</sub> | 0.969      | 0.976      |
| Cs <sub>2</sub> SrCoBr <sub>6</sub> | 0.817      | 0.949      | Cs <sub>2</sub> BaFeBr <sub>6</sub> | 0.775      | 0.937      | Cs <sub>2</sub> MnCuBr <sub>6</sub> | 0.954      | 0.976      |
| Cs <sub>2</sub> SrNiBr <sub>6</sub> | 0.817      | 0.969      | Cs <sub>2</sub> BaCoBr <sub>6</sub> | 0.775      | 0.949      | Cs <sub>2</sub> MnZnBr <sub>6</sub> | 0.951      | 0.976      |
| Cs <sub>2</sub> SrCuBr <sub>6</sub> | 0.817      | 0.954      | Cs <sub>2</sub> BaNiBr <sub>6</sub> | 0.775      | 0.969      | Cs <sub>2</sub> MnPdBr <sub>6</sub> | 0.910      | 0.976      |
| Cs <sub>2</sub> SrZnBr <sub>6</sub> | 0.817      | 0.951      | Cs <sub>2</sub> BaCuBr <sub>6</sub> | 0.775      | 0.954      | Cs <sub>2</sub> MnIrBr <sub>6</sub> | 0.897      | 0.976      |
| Cs <sub>2</sub> SrPdBr <sub>6</sub> | 0.817      | 0.910      | Cs <sub>2</sub> BaZnBr <sub>6</sub> | 0.775      | 0.951      | Cs <sub>2</sub> MnPtBr <sub>6</sub> | 0.910      | 0.976      |
| Cs <sub>2</sub> SrIrBr <sub>6</sub> | 0.817      | 0.897      | Cs <sub>2</sub> BaPdBr <sub>6</sub> | 0.775      | 0.910      | Cs <sub>2</sub> MnTeBr <sub>6</sub> | 0.867      | 0.976      |
| Cs <sub>2</sub> SrPtBr <sub>6</sub> | 0.817      | 0.910      | Cs <sub>2</sub> BaIrBr <sub>6</sub> | 0.775      | 0.897      | Cs <sub>2</sub> MnFeI <sub>6</sub>  | 0.918      | 0.953      |
| Cs <sub>2</sub> SrTeBr <sub>6</sub> | 0.817      | 0.867      | Cs <sub>2</sub> BaPtBr <sub>6</sub> | 0.775      | 0.910      | Cs <sub>2</sub> MnCoI <sub>6</sub>  | 0.929      | 0.953      |
| Cs <sub>2</sub> SrBaI <sub>6</sub>  | 0.771      | 0.810      | Cs <sub>2</sub> BaTeBr <sub>6</sub> | 0.775      | 0.867      | Cs <sub>2</sub> MnNiI <sub>6</sub>  | 0.947      | 0.953      |
| Cs <sub>2</sub> SrMnI <sub>6</sub>  | 0.810      | 0.953      | Cs <sub>2</sub> BaMnI <sub>6</sub>  | 0.771      | 0.953      | Cs <sub>2</sub> MnCuI <sub>6</sub>  | 0.934      | 0.953      |
| Cs <sub>2</sub> SrFeI <sub>6</sub>  | 0.810      | 0.918      | Cs <sub>2</sub> BaFeI <sub>6</sub>  | 0.771      | 0.918      | Cs <sub>2</sub> MnZnI <sub>6</sub>  | 0.931      | 0.953      |
| Cs <sub>2</sub> SrCoI <sub>6</sub>  | 0.810      | 0.929      | Cs <sub>2</sub> BaCoI <sub>6</sub>  | 0.771      | 0.929      | Cs <sub>2</sub> MnPdI <sub>6</sub>  | 0.894      | 0.953      |
| Cs <sub>2</sub> SrNiI <sub>6</sub>  | 0.810      | 0.947      | Cs <sub>2</sub> BaNiI <sub>6</sub>  | 0.771      | 0.947      | Cs <sub>2</sub> MnIrI <sub>6</sub>  | 0.883      | 0.953      |
| Cs <sub>2</sub> SrCuI <sub>6</sub>  | 0.810      | 0.934      | Cs <sub>2</sub> BaCuI <sub>6</sub>  | 0.771      | 0.934      | Cs <sub>2</sub> MnPtI <sub>6</sub>  | 0.894      | 0.953      |
| Cs <sub>2</sub> SrZnI <sub>6</sub>  | 0.810      | 0.931      | Cs <sub>2</sub> BaZnI <sub>6</sub>  | 0.771      | 0.931      | Cs <sub>2</sub> MnTeI <sub>6</sub>  | 0.855      | 0.953      |
| Cs <sub>2</sub> SrPdI <sub>6</sub>  | 0.810      | 0.894      | Cs <sub>2</sub> BaPdI <sub>6</sub>  | 0.771      | 0.894      | Cs <sub>2</sub> FeCoF <sub>6</sub>  | 1.022      | 1.005      |
| Cs <sub>2</sub> SrIrI <sub>6</sub>  | 0.810      | 0.883      | Cs <sub>2</sub> BaIrI <sub>6</sub>  | 0.771      | 0.883      | Cs <sub>2</sub> FeNiF <sub>6</sub>  | 1.050      | 1.005      |
| Cs <sub>2</sub> SrPtI <sub>6</sub>  | 0.810      | 0.894      | Cs <sub>2</sub> BaPtI <sub>6</sub>  | 0.771      | 0.894      | Cs <sub>2</sub> FeCuF <sub>6</sub>  | 1.030      | 1.005      |
| Cs <sub>2</sub> SrTeI <sub>6</sub>  | 0.81       | 0.855      | Cs <sub>2</sub> BaTeI <sub>6</sub>  | 0.771      | 0.855      | Cs <sub>2</sub> FeZnF <sub>6</sub>  | 1.025      | 1.005      |
| Cs <sub>2</sub> BaMnF <sub>6</sub>  | 0.792      | 1.061      | Cs <sub>2</sub> MnFeF <sub>6</sub>  | 1.005      | 1.061      | Cs <sub>2</sub> FePdF <sub>6</sub>  | 0.969      | 1.005      |
| Cs <sub>2</sub> BaFeF <sub>6</sub>  | 0.792      | 1.005      | Cs <sub>2</sub> MnCoF <sub>6</sub>  | 1.022      | 1.061      | Cs <sub>2</sub> FeIrF <sub>6</sub>  | 0.951      | 1.005      |
| Cs <sub>2</sub> BaCoF <sub>6</sub>  | 0.792      | 1.022      | Cs <sub>2</sub> MnNiF <sub>6</sub>  | 1.050      | 1.061      | Cs <sub>2</sub> FePtF <sub>6</sub>  | 0.969      | 1.005      |
| Cs <sub>2</sub> BaNiF <sub>6</sub>  | 0.792      | 1.050      | Cs <sub>2</sub> MnCuF <sub>6</sub>  | 1.030      | 1.061      | Cs <sub>2</sub> FeTeF <sub>6</sub>  | 0.910      | 1.005      |
| Cs <sub>2</sub> BaCuF <sub>6</sub>  | 0.792      | 1.030      | Cs <sub>2</sub> MnZnF <sub>6</sub>  | 1.025      | 1.061      | Cs <sub>2</sub> FeCoCl <sub>6</sub> | 0.950      | 0.963      |
| Cs <sub>2</sub> BaZnF <sub>6</sub>  | 0.792      | 1.025      | Cs <sub>2</sub> MnPdF <sub>6</sub>  | 0.969      | 1.061      | Cs <sub>2</sub> FeNiCl <sub>6</sub> | 0.950      | 0.984      |
| Cs <sub>2</sub> BaPdF <sub>6</sub>  | 0.792      | 0.969      | Cs <sub>2</sub> MnIrF <sub>6</sub>  | 0.951      | 1.061      | Cs <sub>2</sub> FeCuCl <sub>6</sub> | 0.950      | 0.969      |
| Cs <sub>2</sub> BaIrF <sub>6</sub>  | 0.792      | 0.951      | Cs <sub>2</sub> MnPtF <sub>6</sub>  | 0.969      | 1.061      | Cs <sub>2</sub> FeZnCl <sub>6</sub> | 0.950      | 0.965      |
| Cs <sub>2</sub> BaPtF <sub>6</sub>  | 0.792      | 0.969      | Cs <sub>2</sub> MnTeF <sub>6</sub>  | 0.910      | 1.061      | Cs <sub>2</sub> FePdCl <sub>6</sub> | 0.922      | 0.950      |
| Cs <sub>2</sub> BaTeF <sub>6</sub>  | 0.792      | 0.910      | Cs <sub>2</sub> MnFeCl <sub>6</sub> | 0.950      | 0.992      | Cs <sub>2</sub> FeIrCl <sub>6</sub> | 0.908      | 0.950      |
| Cs <sub>2</sub> BaMnCl <sub>6</sub> | 0.779      | 0.992      | Cs <sub>2</sub> MnCoCl <sub>6</sub> | 0.963      | 0.992      | Cs <sub>2</sub> FePtCl <sub>6</sub> | 0.922      | 0.950      |

| Material                            | $t_{\min}$ | $t_{\max}$ | Material                            | $t_{\min}$ | $t_{\max}$ | Material                            | $t_{\min}$ | $t_{\max}$ |
|-------------------------------------|------------|------------|-------------------------------------|------------|------------|-------------------------------------|------------|------------|
| Cs <sub>2</sub> FeTeCl <sub>6</sub> | 0.876      | 0.950      | Cs <sub>2</sub> CoZnI <sub>6</sub>  | 0.929      | 0.931      | Cs <sub>2</sub> CuPdBr <sub>6</sub> | 0.910      | 0.954      |
| Cs <sub>2</sub> FeCoBr <sub>6</sub> | 0.937      | 0.949      | Cs <sub>2</sub> CoPdI <sub>6</sub>  | 0.894      | 0.929      | Cs <sub>2</sub> CuIrBr <sub>6</sub> | 0.897      | 0.954      |
| Cs <sub>2</sub> FeNiBr <sub>6</sub> | 0.937      | 0.969      | Cs <sub>2</sub> CoIrI <sub>6</sub>  | 0.883      | 0.929      | Cs <sub>2</sub> CuPtBr <sub>6</sub> | 0.910      | 0.954      |
| Cs <sub>2</sub> FeCuBr <sub>6</sub> | 0.937      | 0.954      | Cs <sub>2</sub> CoPtI <sub>6</sub>  | 0.894      | 0.929      | Cs <sub>2</sub> CuTeBr <sub>6</sub> | 0.867      | 0.954      |
| Cs <sub>2</sub> FeZnBr <sub>6</sub> | 0.937      | 0.951      | Cs <sub>2</sub> CoTeI <sub>6</sub>  | 0.855      | 0.929      | Cs <sub>2</sub> CuZnI <sub>6</sub>  | 0.931      | 0.934      |
| Cs <sub>2</sub> FePdBr <sub>6</sub> | 0.910      | 0.937      | Cs <sub>2</sub> NiCuF <sub>6</sub>  | 1.030      | 1.050      | Cs <sub>2</sub> CuPdI <sub>6</sub>  | 0.894      | 0.934      |
| Cs <sub>2</sub> FeIrBr <sub>6</sub> | 0.897      | 0.937      | Cs <sub>2</sub> NiZnF <sub>6</sub>  | 1.025      | 1.050      | Cs <sub>2</sub> CuIrI <sub>6</sub>  | 0.883      | 0.934      |
| Cs <sub>2</sub> FePtBr <sub>6</sub> | 0.910      | 0.937      | Cs <sub>2</sub> NiPdF <sub>6</sub>  | 0.969      | 1.050      | Cs <sub>2</sub> CuPtI <sub>6</sub>  | 0.894      | 0.934      |
| Cs <sub>2</sub> FeTeBr <sub>6</sub> | 0.867      | 0.937      | Cs <sub>2</sub> NiIrF <sub>6</sub>  | 0.951      | 1.050      | Cs <sub>2</sub> CuTeI <sub>6</sub>  | 0.855      | 0.934      |
| Cs <sub>2</sub> FeCoI <sub>6</sub>  | 0.918      | 0.929      | Cs <sub>2</sub> NiPtF <sub>6</sub>  | 0.969      | 1.050      | Cs <sub>2</sub> ZnPdF <sub>6</sub>  | 0.969      | 1.025      |
| Cs <sub>2</sub> FeNiI <sub>6</sub>  | 0.918      | 0.947      | Cs <sub>2</sub> NiTeF <sub>6</sub>  | 0.910      | 1.050      | Cs <sub>2</sub> ZnIrF <sub>6</sub>  | 0.951      | 1.025      |
| Cs <sub>2</sub> FeCuI <sub>6</sub>  | 0.918      | 0.934      | Cs <sub>2</sub> NiCuCl <sub>6</sub> | 0.969      | 0.984      | Cs <sub>2</sub> ZnPtF <sub>6</sub>  | 0.969      | 1.025      |
| Cs <sub>2</sub> FeZnI <sub>6</sub>  | 0.918      | 0.931      | Cs <sub>2</sub> NiZnCl <sub>6</sub> | 0.965      | 0.984      | Cs <sub>2</sub> ZnTeF <sub>6</sub>  | 0.910      | 1.025      |
| Cs <sub>2</sub> FePdI <sub>6</sub>  | 0.894      | 0.918      | Cs <sub>2</sub> NiPdCl <sub>6</sub> | 0.922      | 0.984      | Cs <sub>2</sub> ZnPdCl <sub>6</sub> | 0.922      | 0.965      |
| Cs <sub>2</sub> FeIrI <sub>6</sub>  | 0.883      | 0.918      | Cs <sub>2</sub> NiIrCl <sub>6</sub> | 0.908      | 0.984      | Cs <sub>2</sub> ZnIrCl <sub>6</sub> | 0.908      | 0.965      |
| Cs <sub>2</sub> FePtI <sub>6</sub>  | 0.894      | 0.918      | Cs <sub>2</sub> NiPtCl <sub>6</sub> | 0.922      | 0.984      | Cs <sub>2</sub> ZnPtCl <sub>6</sub> | 0.922      | 0.965      |
| Cs <sub>2</sub> FeTeI <sub>6</sub>  | 0.855      | 0.918      | Cs <sub>2</sub> NiTeCl <sub>6</sub> | 0.876      | 0.984      | Cs <sub>2</sub> ZnTeCl <sub>6</sub> | 0.876      | 0.965      |
| Cs <sub>2</sub> CoNiF <sub>6</sub>  | 1.022      | 1.050      | Cs <sub>2</sub> NiCuBr <sub>6</sub> | 0.954      | 0.969      | Cs <sub>2</sub> ZnPdBr <sub>6</sub> | 0.910      | 0.951      |
| Cs <sub>2</sub> CoCuF <sub>6</sub>  | 1.022      | 1.030      | Cs <sub>2</sub> NiZnBr <sub>6</sub> | 0.951      | 0.969      | Cs <sub>2</sub> ZnIrBr <sub>6</sub> | 0.897      | 0.951      |
| Cs <sub>2</sub> CoZnF <sub>6</sub>  | 1.022      | 1.025      | Cs <sub>2</sub> NiPdBr <sub>6</sub> | 0.910      | 0.969      | Cs <sub>2</sub> ZnPtBr <sub>6</sub> | 0.910      | 0.951      |
| Cs <sub>2</sub> CoPdF <sub>6</sub>  | 0.969      | 1.022      | Cs <sub>2</sub> NiIrBr <sub>6</sub> | 0.897      | 0.969      | Cs <sub>2</sub> ZnTeBr <sub>6</sub> | 0.867      | 0.951      |
| Cs <sub>2</sub> CoIrF <sub>6</sub>  | 0.951      | 1.022      | Cs <sub>2</sub> NiPtBr <sub>6</sub> | 0.910      | 0.969      | Cs <sub>2</sub> ZnPdI <sub>6</sub>  | 0.894      | 0.931      |
| Cs <sub>2</sub> CoPtF <sub>6</sub>  | 0.969      | 1.022      | Cs <sub>2</sub> NiTeBr <sub>6</sub> | 0.867      | 0.969      | Cs <sub>2</sub> ZnIrI <sub>6</sub>  | 0.883      | 0.931      |
| Cs <sub>2</sub> CoTeF <sub>6</sub>  | 0.910      | 1.022      | Cs <sub>2</sub> NiCuI <sub>6</sub>  | 0.934      | 0.947      | Cs <sub>2</sub> ZnPtI <sub>6</sub>  | 0.894      | 0.931      |
| Cs <sub>2</sub> CoNiCl <sub>6</sub> | 0.963      | 0.984      | Cs <sub>2</sub> NiZnI <sub>6</sub>  | 0.931      | 0.947      | Cs <sub>2</sub> ZnTeI <sub>6</sub>  | 0.855      | 0.931      |
| Cs <sub>2</sub> CoCuCl <sub>6</sub> | 0.963      | 0.969      | Cs <sub>2</sub> NiPdI <sub>6</sub>  | 0.894      | 0.947      | Cs <sub>2</sub> PdIrF <sub>6</sub>  | 0.951      | 0.969      |
| Cs <sub>2</sub> CoZnCl <sub>6</sub> | 0.963      | 0.965      | Cs <sub>2</sub> NiIrI <sub>6</sub>  | 0.883      | 0.947      | Cs <sub>2</sub> PdPtF <sub>6</sub>  | 0.969      | 0.969      |
| Cs <sub>2</sub> CoPdCl <sub>6</sub> | 0.922      | 0.963      | Cs <sub>2</sub> NiPtI <sub>6</sub>  | 0.894      | 0.947      | Cs <sub>2</sub> PdTeF <sub>6</sub>  | 0.910      | 0.969      |
| Cs <sub>2</sub> CoIrCl <sub>6</sub> | 0.908      | 0.963      | Cs <sub>2</sub> NiTeI <sub>6</sub>  | 0.855      | 0.947      | Cs <sub>2</sub> PdIrCl <sub>6</sub> | 0.908      | 0.922      |
| Cs <sub>2</sub> CoPtCl <sub>6</sub> | 0.922      | 0.963      | Cs <sub>2</sub> CuZnF <sub>6</sub>  | 1.025      | 1.030      | Cs <sub>2</sub> PdPtCl <sub>6</sub> | 0.922      | 0.922      |
| Cs <sub>2</sub> CoTeCl <sub>6</sub> | 0.876      | 0.963      | Cs <sub>2</sub> CuPdF <sub>6</sub>  | 0.969      | 1.030      | Cs <sub>2</sub> PdTeCl <sub>6</sub> | 0.876      | 0.922      |
| Cs <sub>2</sub> CoNiBr <sub>6</sub> | 0.949      | 0.969      | Cs <sub>2</sub> CuIrF <sub>6</sub>  | 0.951      | 1.030      | Cs <sub>2</sub> PdIrBr <sub>6</sub> | 0.897      | 0.910      |
| Cs <sub>2</sub> CoCuBr <sub>6</sub> | 0.949      | 0.954      | Cs <sub>2</sub> CuPtF <sub>6</sub>  | 0.969      | 1.030      | Cs <sub>2</sub> PdPtBr <sub>6</sub> | 0.910      | 0.910      |
| Cs <sub>2</sub> CoZnBr <sub>6</sub> | 0.949      | 0.951      | Cs <sub>2</sub> CuTeF <sub>6</sub>  | 0.910      | 1.030      | Cs <sub>2</sub> PdTeBr <sub>6</sub> | 0.867      | 0.910      |
| Cs <sub>2</sub> CoPdBr <sub>6</sub> | 0.910      | 0.949      | Cs <sub>2</sub> CuZnCl <sub>6</sub> | 0.965      | 0.969      | Cs <sub>2</sub> PdIrI <sub>6</sub>  | 0.883      | 0.894      |
| Cs <sub>2</sub> CoIrBr <sub>6</sub> | 0.897      | 0.949      | Cs <sub>2</sub> CuPdCl <sub>6</sub> | 0.922      | 0.969      | Cs <sub>2</sub> PdPtI <sub>6</sub>  | 0.894      | 0.894      |
| Cs <sub>2</sub> CoPtBr <sub>6</sub> | 0.910      | 0.949      | Cs <sub>2</sub> CuIrCl <sub>6</sub> | 0.908      | 0.969      | Cs <sub>2</sub> PdTeI <sub>6</sub>  | 0.855      | 0.894      |
| Cs <sub>2</sub> CoTeBr <sub>6</sub> | 0.867      | 0.949      | Cs <sub>2</sub> CuPtCl <sub>6</sub> | 0.922      | 0.969      | Cs <sub>2</sub> IrPtF <sub>6</sub>  | 0.969      | 0.951      |
| Cs <sub>2</sub> CoNiI <sub>6</sub>  | 0.929      | 0.947      | Cs <sub>2</sub> CuTeCl <sub>6</sub> | 0.876      | 0.969      | Cs <sub>2</sub> IrTeF <sub>6</sub>  | 0.910      | 0.951      |
| Cs <sub>2</sub> CoCuI <sub>6</sub>  | 0.929      | 0.934      | Cs <sub>2</sub> CuZnBr <sub>6</sub> | 0.951      | 0.954      | Cs <sub>2</sub> IrPtCl <sub>6</sub> | 0.922      | 0.908      |

| Material                     | $t_{\min}$ | $t_{\max}$ | Material                     | $t_{\min}$ | $t_{\max}$ | Material                    | $t_{\min}$ | $t_{\max}$ |
|------------------------------|------------|------------|------------------------------|------------|------------|-----------------------------|------------|------------|
| $\text{Cs}_2\text{IrTeCl}_6$ | 0.876      | 0.908      | $\text{Cs}_2\text{CdZnCl}_6$ | 0.892      | 0.965      | $\text{Cs}_2\text{CdTeI}_6$ | 0.855      | 0.869      |
| $\text{Cs}_2\text{IrPtBr}_6$ | 0.897      | 0.910      | $\text{Cs}_2\text{CdPdCl}_6$ | 0.892      | 0.922      |                             |            |            |
| $\text{Cs}_2\text{IrTeBr}_6$ | 0.867      | 0.897      | $\text{Cs}_2\text{CdIrCl}_6$ | 0.892      | 0.908      |                             |            |            |
| $\text{Cs}_2\text{IrPtI}_6$  | 0.883      | 0.894      | $\text{Cs}_2\text{CdPtCl}_6$ | 0.892      | 0.922      |                             |            |            |
| $\text{Cs}_2\text{IrTeI}_6$  | 0.883      | 0.855      | $\text{Cs}_2\text{CdTeCl}_6$ | 0.876      | 0.892      |                             |            |            |
| $\text{Cs}_2\text{PtTeF}_6$  | 0.910      | 0.969      | $\text{Cs}_2\text{CdPbBr}_6$ | 0.815      | 0.882      |                             |            |            |
| $\text{Cs}_2\text{PtTeCl}_6$ | 0.876      | 0.922      | $\text{Cs}_2\text{CdSnBr}_6$ | 0.833      | 0.882      |                             |            |            |
| $\text{Cs}_2\text{PtTeBr}_6$ | 0.867      | 0.910      | $\text{Cs}_2\text{CdGeBr}_6$ | 0.882      | 0.954      |                             |            |            |
| $\text{Cs}_2\text{PtTeI}_6$  | 0.855      | 0.894      | $\text{Cs}_2\text{CdBeBr}_6$ | 0.882      | 1.065      |                             |            |            |
| $\text{Cs}_2\text{CdPbF}_6$  | 0.842      | 0.930      | $\text{Cs}_2\text{CdMgBr}_6$ | 0.882      | 0.958      |                             |            |            |
| $\text{Cs}_2\text{CdSnF}_6$  | 0.866      | 0.930      | $\text{Cs}_2\text{CdCaBr}_6$ | 0.867      | 0.882      |                             |            |            |
| $\text{Cs}_2\text{CdGeF}_6$  | 0.930      | 1.030      | $\text{Cs}_2\text{CdSrBr}_6$ | 0.817      | 0.882      |                             |            |            |
| $\text{Cs}_2\text{CdBeF}_6$  | 0.930      | 1.192      | $\text{Cs}_2\text{CdBaBr}_6$ | 0.775      | 0.882      |                             |            |            |
| $\text{Cs}_2\text{CdMgF}_6$  | 0.930      | 1.035      | $\text{Cs}_2\text{CdMnBr}_6$ | 0.882      | 0.976      |                             |            |            |
| $\text{Cs}_2\text{CdCaF}_6$  | 0.910      | 0.930      | $\text{Cs}_2\text{CdFeBr}_6$ | 0.882      | 0.937      |                             |            |            |
| $\text{Cs}_2\text{CdSrF}_6$  | 0.845      | 0.930      | $\text{Cs}_2\text{CdCoBr}_6$ | 0.882      | 0.949      |                             |            |            |
| $\text{Cs}_2\text{CdBaF}_6$  | 0.792      | 0.930      | $\text{Cs}_2\text{CdNiBr}_6$ | 0.882      | 0.969      |                             |            |            |
| $\text{Cs}_2\text{CdMnF}_6$  | 0.930      | 1.061      | $\text{Cs}_2\text{CdCuBr}_6$ | 0.882      | 0.954      |                             |            |            |
| $\text{Cs}_2\text{CdFeF}_6$  | 0.930      | 1.005      | $\text{Cs}_2\text{CdZnBr}_6$ | 0.882      | 0.951      |                             |            |            |
| $\text{Cs}_2\text{CdCoF}_6$  | 0.930      | 1.022      | $\text{Cs}_2\text{CdPdBr}_6$ | 0.882      | 0.910      |                             |            |            |
| $\text{Cs}_2\text{CdNiF}_6$  | 0.930      | 1.050      | $\text{Cs}_2\text{CdIrBr}_6$ | 0.882      | 0.897      |                             |            |            |
| $\text{Cs}_2\text{CdCuF}_6$  | 0.930      | 1.030      | $\text{Cs}_2\text{CdPtBr}_6$ | 0.882      | 0.910      |                             |            |            |
| $\text{Cs}_2\text{CdZnF}_6$  | 0.930      | 1.025      | $\text{Cs}_2\text{CdTeBr}_6$ | 0.867      | 0.882      |                             |            |            |
| $\text{Cs}_2\text{CdPdF}_6$  | 0.930      | 0.969      | $\text{Cs}_2\text{CdPbI}_6$  | 0.807      | 0.869      |                             |            |            |
| $\text{Cs}_2\text{CdIrF}_6$  | 0.930      | 0.951      | $\text{Cs}_2\text{CdSnI}_6$  | 0.824      | 0.869      |                             |            |            |
| $\text{Cs}_2\text{CdPtF}_6$  | 0.930      | 0.969      | $\text{Cs}_2\text{CdGeI}_6$  | 0.869      | 0.934      |                             |            |            |
| $\text{Cs}_2\text{CdTeF}_6$  | 0.910      | 0.930      | $\text{Cs}_2\text{CdBeI}_6$  | 0.869      | 1.033      |                             |            |            |
| $\text{Cs}_2\text{CdPbCl}_6$ | 0.820      | 0.892      | $\text{Cs}_2\text{CdMgI}_6$  | 0.869      | 0.937      |                             |            |            |
| $\text{Cs}_2\text{CdSnCl}_6$ | 0.840      | 0.892      | $\text{Cs}_2\text{CdCaI}_6$  | 0.855      | 0.869      |                             |            |            |
| $\text{Cs}_2\text{CdGeCl}_6$ | 0.892      | 0.969      | $\text{Cs}_2\text{CdSrI}_6$  | 0.810      | 0.869      |                             |            |            |
| $\text{Cs}_2\text{CdBeCl}_6$ | 0.892      | 1.089      | $\text{Cs}_2\text{CdBaI}_6$  | 0.771      | 0.869      |                             |            |            |
| $\text{Cs}_2\text{CdMgCl}_6$ | 0.892      | 0.973      | $\text{Cs}_2\text{CdMnI}_6$  | 0.869      | 0.953      |                             |            |            |
| $\text{Cs}_2\text{CdCaCl}_6$ | 0.876      | 0.892      | $\text{Cs}_2\text{CdFeI}_6$  | 0.869      | 0.918      |                             |            |            |
| $\text{Cs}_2\text{CdSrCl}_6$ | 0.823      | 0.892      | $\text{Cs}_2\text{CdCoI}_6$  | 0.869      | 0.929      |                             |            |            |
| $\text{Cs}_2\text{CdBaCl}_6$ | 0.779      | 0.892      | $\text{Cs}_2\text{CdNiI}_6$  | 0.869      | 0.947      |                             |            |            |
| $\text{Cs}_2\text{CdMnCl}_6$ | 0.892      | 0.992      | $\text{Cs}_2\text{CdCuI}_6$  | 0.869      | 0.934      |                             |            |            |
| $\text{Cs}_2\text{CdFeCl}_6$ | 0.892      | 0.950      | $\text{Cs}_2\text{CdZnI}_6$  | 0.869      | 0.931      |                             |            |            |
| $\text{Cs}_2\text{CdCoCl}_6$ | 0.892      | 0.963      | $\text{Cs}_2\text{CdPdI}_6$  | 0.869      | 0.894      |                             |            |            |
| $\text{Cs}_2\text{CdNiCl}_6$ | 0.892      | 0.984      | $\text{Cs}_2\text{CdIrI}_6$  | 0.869      | 0.883      |                             |            |            |
| $\text{Cs}_2\text{CdCuCl}_6$ | 0.892      | 0.969      | $\text{Cs}_2\text{CdPtI}_6$  | 0.869      | 0.894      |                             |            |            |

**Table S5.** Double perovskite with minimum tolerance factor in unstable region

| Material                            | $t_{\min}$ | $t_{\max}$ | Material                            | $t_{\min}$ | $t_{\max}$ | Material                            | $t_{\min}$ | $t_{\max}$ |
|-------------------------------------|------------|------------|-------------------------------------|------------|------------|-------------------------------------|------------|------------|
| Cs <sub>2</sub> PbSnI <sub>6</sub>  | 0.807      | 0.824      | Cs <sub>2</sub> SrPdI <sub>6</sub>  | 0.810      | 0.894      | Cs <sub>2</sub> BaPdI <sub>6</sub>  | 0.771      | 0.894      |
| Cs <sub>2</sub> PbGeI <sub>6</sub>  | 0.807      | 0.934      | Cs <sub>2</sub> SrIrI <sub>6</sub>  | 0.810      | 0.883      | Cs <sub>2</sub> BaIrI <sub>6</sub>  | 0.771      | 0.883      |
| Cs <sub>2</sub> PbBeI <sub>6</sub>  | 0.807      | 1.033      | Cs <sub>2</sub> SrPtI <sub>6</sub>  | 0.810      | 0.894      | Cs <sub>2</sub> BaPtI <sub>6</sub>  | 0.771      | 0.894      |
| Cs <sub>2</sub> PbMgI <sub>6</sub>  | 0.807      | 0.937      | Cs <sub>2</sub> SrTeI <sub>6</sub>  | 0.810      | 0.855      | Cs <sub>2</sub> BaTeI <sub>6</sub>  | 0.771      | 0.855      |
| Cs <sub>2</sub> PbCaI <sub>6</sub>  | 0.807      | 0.855      | Cs <sub>2</sub> BaMnF <sub>6</sub>  | 0.792      | 1.061      | Cs <sub>2</sub> CdBaF <sub>6</sub>  | 0.792      | 0.930      |
| Cs <sub>2</sub> PbSrI <sub>6</sub>  | 0.807      | 0.810      | Cs <sub>2</sub> BaFeF <sub>6</sub>  | 0.792      | 1.005      | Cs <sub>2</sub> CdBaCl <sub>6</sub> | 0.779      | 0.892      |
| Cs <sub>2</sub> PbBaI <sub>6</sub>  | 0.807      | 0.771      | Cs <sub>2</sub> BaCoF <sub>6</sub>  | 0.792      | 1.022      | Cs <sub>2</sub> CdBaBr <sub>6</sub> | 0.775      | 0.882      |
| Cs <sub>2</sub> PbMnI <sub>6</sub>  | 0.807      | 0.953      | Cs <sub>2</sub> BaNiF <sub>6</sub>  | 0.792      | 1.050      | Cs <sub>2</sub> CdPbI <sub>6</sub>  | 0.807      | 0.869      |
| Cs <sub>2</sub> PbFeI <sub>6</sub>  | 0.807      | 0.918      | Cs <sub>2</sub> BaCuF <sub>6</sub>  | 0.792      | 1.030      | Cs <sub>2</sub> CdSrI <sub>6</sub>  | 0.810      | 0.869      |
| Cs <sub>2</sub> PbCoI <sub>6</sub>  | 0.807      | 0.929      | Cs <sub>2</sub> BaZnF <sub>6</sub>  | 0.792      | 1.025      | Cs <sub>2</sub> CdBaI <sub>6</sub>  | 0.771      | 0.869      |
| Cs <sub>2</sub> PbNiI <sub>6</sub>  | 0.807      | 0.947      | Cs <sub>2</sub> BaPdF <sub>6</sub>  | 0.792      | 0.969      |                                     |            |            |
| Cs <sub>2</sub> PbCuI <sub>6</sub>  | 0.807      | 0.934      | Cs <sub>2</sub> BaIrF <sub>6</sub>  | 0.792      | 0.951      |                                     |            |            |
| Cs <sub>2</sub> PbZnI <sub>6</sub>  | 0.807      | 0.931      | Cs <sub>2</sub> BaPtF <sub>6</sub>  | 0.792      | 0.969      |                                     |            |            |
| Cs <sub>2</sub> PbPdI <sub>6</sub>  | 0.807      | 0.894      | Cs <sub>2</sub> BaTeF <sub>6</sub>  | 0.792      | 0.910      |                                     |            |            |
| Cs <sub>2</sub> PbIrI <sub>6</sub>  | 0.807      | 0.883      | Cs <sub>2</sub> BaMnCl <sub>6</sub> | 0.779      | 0.992      |                                     |            |            |
| Cs <sub>2</sub> PbPtI <sub>6</sub>  | 0.807      | 0.894      | Cs <sub>2</sub> BaFeCl <sub>6</sub> | 0.779      | 0.950      |                                     |            |            |
| Cs <sub>2</sub> PbTeI <sub>6</sub>  | 0.807      | 0.855      | Cs <sub>2</sub> BaCoCl <sub>6</sub> | 0.779      | 0.963      |                                     |            |            |
| Cs <sub>2</sub> BeBaF <sub>6</sub>  | 0.792      | 1.192      | Cs <sub>2</sub> BaNiCl <sub>6</sub> | 0.779      | 0.984      |                                     |            |            |
| Cs <sub>2</sub> BeBaCl <sub>6</sub> | 0.779      | 1.089      | Cs <sub>2</sub> BaCuCl <sub>6</sub> | 0.779      | 0.969      |                                     |            |            |
| Cs <sub>2</sub> BeSrI <sub>6</sub>  | 0.810      | 1.033      | Cs <sub>2</sub> BaZnCl <sub>6</sub> | 0.779      | 0.965      |                                     |            |            |
| Cs <sub>2</sub> BeBaI <sub>6</sub>  | 0.771      | 1.033      | Cs <sub>2</sub> BaPdCl <sub>6</sub> | 0.779      | 0.922      |                                     |            |            |
| Cs <sub>2</sub> MgBaF <sub>6</sub>  | 0.792      | 1.035      | Cs <sub>2</sub> BaIrCl <sub>6</sub> | 0.779      | 0.908      |                                     |            |            |
| Cs <sub>2</sub> MgBaCl <sub>6</sub> | 0.779      | 0.973      | Cs <sub>2</sub> BaPtCl <sub>6</sub> | 0.779      | 0.922      |                                     |            |            |
| Cs <sub>2</sub> MgBaBr <sub>6</sub> | 0.775      | 0.958      | Cs <sub>2</sub> BaTeCl <sub>6</sub> | 0.779      | 0.876      |                                     |            |            |
| Cs <sub>2</sub> MgSrI <sub>6</sub>  | 0.810      | 0.937      | Cs <sub>2</sub> BaMnBr <sub>6</sub> | 0.775      | 0.976      |                                     |            |            |
| Cs <sub>2</sub> MgBaI <sub>6</sub>  | 0.771      | 0.937      | Cs <sub>2</sub> BaFeBr <sub>6</sub> | 0.775      | 0.937      |                                     |            |            |
| Cs <sub>2</sub> CaBaF <sub>6</sub>  | 0.792      | 0.910      | Cs <sub>2</sub> BaCoBr <sub>6</sub> | 0.775      | 0.949      |                                     |            |            |
| Cs <sub>2</sub> CaBaCl <sub>6</sub> | 0.779      | 0.876      | Cs <sub>2</sub> BaNiBr <sub>6</sub> | 0.775      | 0.969      |                                     |            |            |
| Cs <sub>2</sub> CaBaBr <sub>6</sub> | 0.775      | 0.867      | Cs <sub>2</sub> BaCuBr <sub>6</sub> | 0.775      | 0.954      |                                     |            |            |
| Cs <sub>2</sub> CaSrI <sub>6</sub>  | 0.810      | 0.855      | Cs <sub>2</sub> BaZnBr <sub>6</sub> | 0.775      | 0.951      |                                     |            |            |
| Cs <sub>2</sub> CaBaI <sub>6</sub>  | 0.771      | 0.855      | Cs <sub>2</sub> BaPdBr <sub>6</sub> | 0.775      | 0.910      |                                     |            |            |
| Cs <sub>2</sub> SrBaCl <sub>6</sub> | 0.779      | 0.823      | Cs <sub>2</sub> BaIrBr <sub>6</sub> | 0.775      | 0.897      |                                     |            |            |
| Cs <sub>2</sub> SrBaBr <sub>6</sub> | 0.775      | 0.817      | Cs <sub>2</sub> BaPtBr <sub>6</sub> | 0.775      | 0.910      |                                     |            |            |
| Cs <sub>2</sub> SrBaI <sub>6</sub>  | 0.771      | 0.810      | Cs <sub>2</sub> BaTeBr <sub>6</sub> | 0.775      | 0.867      |                                     |            |            |
| Cs <sub>2</sub> SrMnI <sub>6</sub>  | 0.810      | 0.953      | Cs <sub>2</sub> BaMnI <sub>6</sub>  | 0.771      | 0.953      |                                     |            |            |
| Cs <sub>2</sub> SrFeI <sub>6</sub>  | 0.810      | 0.918      | Cs <sub>2</sub> BaFeI <sub>6</sub>  | 0.771      | 0.918      |                                     |            |            |
| Cs <sub>2</sub> SrCoI <sub>6</sub>  | 0.810      | 0.929      | Cs <sub>2</sub> BaCoI <sub>6</sub>  | 0.771      | 0.929      |                                     |            |            |
| Cs <sub>2</sub> SrNiI <sub>6</sub>  | 0.810      | 0.947      | Cs <sub>2</sub> BaNiI <sub>6</sub>  | 0.771      | 0.947      |                                     |            |            |
| Cs <sub>2</sub> SrCuI <sub>6</sub>  | 0.810      | 0.934      | Cs <sub>2</sub> BaCuI <sub>6</sub>  | 0.771      | 0.934      |                                     |            |            |
| Cs <sub>2</sub> SrZnI <sub>6</sub>  | 0.810      | 0.931      | Cs <sub>2</sub> BaZnI <sub>6</sub>  | 0.771      | 0.931      |                                     |            |            |

**Table S6.** Double perovskite with maximum tolerance factor in unstable region

| Material                    | $t_{\min}$ | $t_{\max}$ |
|-----------------------------|------------|------------|
| $\text{Cs}_2\text{PbBeF}_6$ | 0.842      | 1.192      |
| $\text{Cs}_2\text{SnBeF}_6$ | 0.866      | 1.192      |
| $\text{Cs}_2\text{GeBeF}_6$ | 1.030      | 1.192      |
| $\text{Cs}_2\text{BeMgF}_6$ | 1.035      | 1.192      |
| $\text{Cs}_2\text{BeCaF}_6$ | 0.910      | 1.192      |
| $\text{Cs}_2\text{BeSrF}_6$ | 0.845      | 1.192      |
| $\text{Cs}_2\text{BeBaF}_6$ | 0.792      | 1.192      |
| $\text{Cs}_2\text{BeMnF}_6$ | 1.061      | 1.192      |
| $\text{Cs}_2\text{BeFeF}_6$ | 1.005      | 1.192      |
| $\text{Cs}_2\text{BeCoF}_6$ | 1.022      | 1.192      |
| $\text{Cs}_2\text{BeNiF}_6$ | 1.050      | 1.192      |
| $\text{Cs}_2\text{BeCuF}_6$ | 1.030      | 1.192      |
| $\text{Cs}_2\text{BeZnF}_6$ | 1.025      | 1.192      |
| $\text{Cs}_2\text{BePdF}_6$ | 0.969      | 1.192      |
| $\text{Cs}_2\text{BeIrF}_6$ | 0.951      | 1.192      |
| $\text{Cs}_2\text{BePtF}_6$ | 0.969      | 1.192      |
| $\text{Cs}_2\text{BeTeF}_6$ | 0.910      | 1.192      |
| $\text{Cs}_2\text{CdBeF}_6$ | 0.930      | 1.192      |

**Table S7.** New tolerance factors  $\tau$  of the 14 predicted all-inorganic double perovskite materials

| Material                     | new tolerance factors $\tau$ |
|------------------------------|------------------------------|
| $\text{Cs}_2\text{PbSnI}_6$  | 5.07                         |
| $\text{Cs}_2\text{PbGeI}_6$  | 4.43                         |
| $\text{Cs}_2\text{PbGeBr}_6$ | 4.18                         |
| $\text{Cs}_2\text{SnGeCl}_6$ | 4.04                         |
| $\text{Cs}_2\text{PbSnBr}_6$ | 4.87                         |
| $\text{Cs}_2\text{MnPtF}_6$  | 3.50                         |
| $\text{Cs}_2\text{CdTeF}_6$  | 3.55                         |
| $\text{Cs}_2\text{CdBeBr}_6$ | 4.54                         |
| $\text{Cs}_2\text{MgMnI}_6$  | 4.69                         |
| $\text{Cs}_2\text{PbSnCl}_6$ | 4.75                         |
| $\text{Cs}_2\text{FeTeF}_6$  | 3.48                         |
| $\text{Cs}_2\text{PbGeCl}_6$ | 4.03                         |
| $\text{Cs}_2\text{ZnTeF}_6$  | 3.47                         |
| $\text{Cs}_2\text{CaZnI}_6$  | 4.47                         |

**Table S8.** The band gaps for PBE functional

| Material                            | Gap  | Material                            | Gap  | Material                            | Gap  | Material                            | Gap  |
|-------------------------------------|------|-------------------------------------|------|-------------------------------------|------|-------------------------------------|------|
| Cs <sub>2</sub> BaCuF <sub>6</sub>  | 0.00 | Cs <sub>2</sub> CaIrF <sub>6</sub>  | 0.00 | Cs <sub>2</sub> MgPtBr <sub>6</sub> | 0.00 | Cs <sub>2</sub> FePtCl <sub>6</sub> | 0.00 |
| Cs <sub>2</sub> BaIrF <sub>6</sub>  | 0.00 | Cs <sub>2</sub> SrTeI <sub>6</sub>  | 0.00 | Cs <sub>2</sub> IrPtCl <sub>6</sub> | 0.00 | Cs <sub>2</sub> NiIrCl <sub>6</sub> | 0.00 |
| Cs <sub>2</sub> FePdBr <sub>6</sub> | 0.00 | Cs <sub>2</sub> BaFeI <sub>6</sub>  | 0.00 | Cs <sub>2</sub> PbCuF <sub>6</sub>  | 0.00 | Cs <sub>2</sub> SrCuF <sub>6</sub>  | 0.00 |
| Cs <sub>2</sub> NiCuBr <sub>6</sub> | 0.00 | Cs <sub>2</sub> CdCoF <sub>6</sub>  | 0.00 | Cs <sub>2</sub> BeCuI <sub>6</sub>  | 0.00 | Cs <sub>2</sub> BaTeF <sub>6</sub>  | 0.00 |
| Cs <sub>2</sub> IrTeCl <sub>6</sub> | 0.00 | Cs <sub>2</sub> PbCoCl <sub>6</sub> | 0.00 | Cs <sub>2</sub> BaCoI <sub>6</sub>  | 0.00 | Cs <sub>2</sub> CoPtI <sub>6</sub>  | 0.00 |
| Cs <sub>2</sub> SnFeF <sub>6</sub>  | 0.00 | Cs <sub>2</sub> CoPtF <sub>6</sub>  | 0.00 | Cs <sub>2</sub> FeCuI <sub>6</sub>  | 0.00 | Cs <sub>2</sub> CaCoCl <sub>6</sub> | 0.00 |
| Cs <sub>2</sub> SrFeI <sub>6</sub>  | 0.00 | Cs <sub>2</sub> NiTeI <sub>6</sub>  | 0.00 | Cs <sub>2</sub> SnFeCl <sub>6</sub> | 0.00 | Cs <sub>2</sub> CaCuCl <sub>6</sub> | 0.00 |
| Cs <sub>2</sub> BaPtI <sub>6</sub>  | 0.00 | Cs <sub>2</sub> IrPtI <sub>6</sub>  | 0.00 | Cs <sub>2</sub> CaFeBr <sub>6</sub> | 0.00 | Cs <sub>2</sub> BaCoBr <sub>6</sub> | 0.00 |
| Cs <sub>2</sub> CoNiF <sub>6</sub>  | 0.00 | Cs <sub>2</sub> FeCuBr <sub>6</sub> | 0.00 | Cs <sub>2</sub> SrCoF <sub>6</sub>  | 0.00 | Cs <sub>2</sub> BaCuBr <sub>6</sub> | 0.00 |
| Cs <sub>2</sub> CaIrBr <sub>6</sub> | 0.00 | Cs <sub>2</sub> FeTeBr <sub>6</sub> | 0.00 | Cs <sub>2</sub> CuPdF <sub>6</sub>  | 0.00 | Cs <sub>2</sub> CoZnCl <sub>6</sub> | 0.00 |
| Cs <sub>2</sub> MnFeCl <sub>6</sub> | 0.00 | Cs <sub>2</sub> CoPdCl <sub>6</sub> | 0.00 | Cs <sub>2</sub> MgFeCl <sub>6</sub> | 0.00 | Cs <sub>2</sub> NiCuCl <sub>6</sub> | 0.00 |
| Cs <sub>2</sub> MnIrBr <sub>6</sub> | 0.00 | Cs <sub>2</sub> MgFeI <sub>6</sub>  | 0.00 | Cs <sub>2</sub> BaFeBr <sub>6</sub> | 0.00 | Cs <sub>2</sub> CuTeCl <sub>6</sub> | 0.00 |
| Cs <sub>2</sub> PbFeF <sub>6</sub>  | 0.00 | Cs <sub>2</sub> MgNiI <sub>6</sub>  | 0.00 | Cs <sub>2</sub> MnCoCl <sub>6</sub> | 0.00 | Cs <sub>2</sub> CdCuCl <sub>6</sub> | 0.00 |
| Cs <sub>2</sub> MnFeI <sub>6</sub>  | 0.00 | Cs <sub>2</sub> MnCoI <sub>6</sub>  | 0.00 | Cs <sub>2</sub> MnNiBr <sub>6</sub> | 0.00 | Cs <sub>2</sub> MgCuI <sub>6</sub>  | 0.00 |
| Cs <sub>2</sub> CoCuF <sub>6</sub>  | 0.00 | Cs <sub>2</sub> BeNiBr <sub>6</sub> | 0.00 | Cs <sub>2</sub> FeNiBr <sub>6</sub> | 0.00 | Cs <sub>2</sub> CoZnI <sub>6</sub>  | 0.00 |
| Cs <sub>2</sub> CoPdF <sub>6</sub>  | 0.00 | Cs <sub>2</sub> SrFeBr <sub>6</sub> | 0.00 | Cs <sub>2</sub> CaCoI <sub>6</sub>  | 0.00 | Cs <sub>2</sub> CoZnF <sub>6</sub>  | 0.00 |
| Cs <sub>2</sub> CoTeF <sub>6</sub>  | 0.00 | Cs <sub>2</sub> BaCoCl <sub>6</sub> | 0.00 | Cs <sub>2</sub> FeTeI <sub>6</sub>  | 0.00 | Cs <sub>2</sub> BeCoBr <sub>6</sub> | 0.00 |
| Cs <sub>2</sub> NiIrI <sub>6</sub>  | 0.00 | Cs <sub>2</sub> CoZnBr <sub>6</sub> | 0.00 | Cs <sub>2</sub> CoCuI <sub>6</sub>  | 0.00 | Cs <sub>2</sub> MgCuCl <sub>6</sub> | 0.00 |
| Cs <sub>2</sub> CdFeF <sub>6</sub>  | 0.00 | Cs <sub>2</sub> CdFeBr <sub>6</sub> | 0.00 | Cs <sub>2</sub> MgFeBr <sub>6</sub> | 0.00 | Cs <sub>2</sub> CaCoBr <sub>6</sub> | 0.00 |
| Cs <sub>2</sub> PbFeBr <sub>6</sub> | 0.00 | Cs <sub>2</sub> GeCoF <sub>6</sub>  | 0.00 | Cs <sub>2</sub> MgPdBr <sub>6</sub> | 0.00 | Cs <sub>2</sub> NiIrBr <sub>6</sub> | 0.00 |
| Cs <sub>2</sub> BeFeBr <sub>6</sub> | 0.00 | Cs <sub>2</sub> BeFeF <sub>6</sub>  | 0.00 | Cs <sub>2</sub> SrFeCl <sub>6</sub> | 0.00 | Cs <sub>2</sub> ZnPtCl <sub>6</sub> | 0.00 |
| Cs <sub>2</sub> FeZnBr <sub>6</sub> | 0.00 | Cs <sub>2</sub> BeCoI <sub>6</sub>  | 0.00 | Cs <sub>2</sub> SrIrCl <sub>6</sub> | 0.00 | Cs <sub>2</sub> GeCoI <sub>6</sub>  | 0.00 |
| Cs <sub>2</sub> NiTeCl <sub>6</sub> | 0.00 | Cs <sub>2</sub> CaFeF <sub>6</sub>  | 0.00 | Cs <sub>2</sub> FeCoBr <sub>6</sub> | 0.00 | Cs <sub>2</sub> PbFeCl <sub>6</sub> | 0.00 |
| Cs <sub>2</sub> PbCoF <sub>6</sub>  | 0.00 | Cs <sub>2</sub> PbCoBr <sub>6</sub> | 0.00 | Cs <sub>2</sub> FeNiCl <sub>6</sub> | 0.00 | Cs <sub>2</sub> BaTeBr <sub>6</sub> | 0.00 |
| Cs <sub>2</sub> GeFeF <sub>6</sub>  | 0.00 | Cs <sub>2</sub> PbTeCl <sub>6</sub> | 0.00 | Cs <sub>2</sub> FeCuCl <sub>6</sub> | 0.00 | Cs <sub>2</sub> CoIrBr <sub>6</sub> | 0.00 |
| Cs <sub>2</sub> FeNiI <sub>6</sub>  | 0.00 | Cs <sub>2</sub> SnFeBr <sub>6</sub> | 0.00 | Cs <sub>2</sub> MgCuF <sub>6</sub>  | 0.00 | Cs <sub>2</sub> GeFeI <sub>6</sub>  | 0.00 |
| Cs <sub>2</sub> BaFeCl <sub>6</sub> | 0.00 | Cs <sub>2</sub> IrPtBr <sub>6</sub> | 0.00 | Cs <sub>2</sub> MnCoF <sub>6</sub>  | 0.00 | Cs <sub>2</sub> GeCoBr <sub>6</sub> | 0.00 |
| Cs <sub>2</sub> CdFeCl <sub>6</sub> | 0.00 | Cs <sub>2</sub> SnCoF <sub>6</sub>  | 0.00 | Cs <sub>2</sub> GeFeBr <sub>6</sub> | 0.00 | Cs <sub>2</sub> GeCoCl <sub>6</sub> | 0.00 |
| Cs <sub>2</sub> CdCoCl <sub>6</sub> | 0.00 | Cs <sub>2</sub> FePdCl <sub>6</sub> | 0.00 | Cs <sub>2</sub> MnFeBr <sub>6</sub> | 0.00 | Cs <sub>2</sub> BeIrCl <sub>6</sub> | 0.00 |
| Cs <sub>2</sub> CaCoF <sub>6</sub>  | 0.00 | Cs <sub>2</sub> CoNiBr <sub>6</sub> | 0.00 | Cs <sub>2</sub> SnCoI <sub>6</sub>  | 0.00 | Cs <sub>2</sub> CoCuBr <sub>6</sub> | 0.00 |
| Cs <sub>2</sub> BaCoF <sub>6</sub>  | 0.00 | Cs <sub>2</sub> PbFeI <sub>6</sub>  | 0.00 | Cs <sub>2</sub> CaCuI <sub>6</sub>  | 0.00 | Cs <sub>2</sub> CoTeBr <sub>6</sub> | 0.00 |
| Cs <sub>2</sub> FeZnF <sub>6</sub>  | 0.00 | Cs <sub>2</sub> CaTeI <sub>6</sub>  | 0.00 | Cs <sub>2</sub> BaFeF <sub>6</sub>  | 0.00 | Cs <sub>2</sub> ZnPdCl <sub>6</sub> | 0.00 |
| Cs <sub>2</sub> CoIrI <sub>6</sub>  | 0.00 | Cs <sub>2</sub> BaCuI <sub>6</sub>  | 0.00 | Cs <sub>2</sub> FePtF <sub>6</sub>  | 0.00 | Cs <sub>2</sub> MgCoF <sub>6</sub>  | 0.00 |
| Cs <sub>2</sub> CdCoI <sub>6</sub>  | 0.00 | Cs <sub>2</sub> SnCoBr <sub>6</sub> | 0.00 | Cs <sub>2</sub> GeFeCl <sub>6</sub> | 0.00 | Cs <sub>2</sub> CaFeCl <sub>6</sub> | 0.00 |
| Cs <sub>2</sub> BeFeCl <sub>6</sub> | 0.00 | Cs <sub>2</sub> PdIrBr <sub>6</sub> | 0.00 | Cs <sub>2</sub> CaIrCl <sub>6</sub> | 0.00 | Cs <sub>2</sub> SrTeCl <sub>6</sub> | 0.00 |
| Cs <sub>2</sub> CoPtCl <sub>6</sub> | 0.00 | Cs <sub>2</sub> GePdF <sub>6</sub>  | 0.00 | Cs <sub>2</sub> BeFeI <sub>6</sub>  | 0.00 | Cs <sub>2</sub> FeTeCl <sub>6</sub> | 0.00 |
| Cs <sub>2</sub> PbCoI <sub>6</sub>  | 0.00 | Cs <sub>2</sub> BeCoF <sub>6</sub>  | 0.00 | Cs <sub>2</sub> MnTeI <sub>6</sub>  | 0.00 | Cs <sub>2</sub> CoPtBr <sub>6</sub> | 0.00 |
| Cs <sub>2</sub> SnFeI <sub>6</sub>  | 0.00 | Cs <sub>2</sub> PdIrF <sub>6</sub>  | 0.00 | Cs <sub>2</sub> IrPtF <sub>6</sub>  | 0.00 | Cs <sub>2</sub> SnTeF <sub>6</sub>  | 0.00 |
| Cs <sub>2</sub> MgFeF <sub>6</sub>  | 0.00 | Cs <sub>2</sub> SnCoCl <sub>6</sub> | 0.00 | Cs <sub>2</sub> CdPtI <sub>6</sub>  | 0.00 | Cs <sub>2</sub> CaCuF <sub>6</sub>  | 0.00 |
| Cs <sub>2</sub> CaFeI <sub>6</sub>  | 0.00 | Cs <sub>2</sub> GePdCl <sub>6</sub> | 0.00 | Cs <sub>2</sub> FeZnCl <sub>6</sub> | 0.00 | Cs <sub>2</sub> FeIrF <sub>6</sub>  | 0.00 |

| Material                            | Gap  | Material                            | Gap  | Material                            | Gap  | Material                            | Gap  |
|-------------------------------------|------|-------------------------------------|------|-------------------------------------|------|-------------------------------------|------|
| Cs <sub>2</sub> CoNiCl <sub>6</sub> | 0.00 | Cs <sub>2</sub> SrTeF <sub>6</sub>  | 0.00 | Cs <sub>2</sub> FePdF <sub>6</sub>  | 0.00 | Cs <sub>2</sub> BePdBr <sub>6</sub> | 0.01 |
| Cs <sub>2</sub> PbTeF <sub>6</sub>  | 0.00 | Cs <sub>2</sub> CdCuF <sub>6</sub>  | 0.00 | Cs <sub>2</sub> PdPtF <sub>6</sub>  | 0.00 | Cs <sub>2</sub> NiTeF <sub>6</sub>  | 0.01 |
| Cs <sub>2</sub> SnNiI <sub>6</sub>  | 0.00 | Cs <sub>2</sub> MgPdCl <sub>6</sub> | 0.00 | Cs <sub>2</sub> CdPtCl <sub>6</sub> | 0.00 | Cs <sub>2</sub> BeZnI <sub>6</sub>  | 0.01 |
| Cs <sub>2</sub> SnTeI <sub>6</sub>  | 0.00 | Cs <sub>2</sub> SrCoBr <sub>6</sub> | 0.00 | Cs <sub>2</sub> SnPtCl <sub>6</sub> | 0.00 | Cs <sub>2</sub> ZnPdI <sub>6</sub>  | 0.01 |
| Cs <sub>2</sub> SrPdI <sub>6</sub>  | 0.00 | Cs <sub>2</sub> CaPtI <sub>6</sub>  | 0.00 | Cs <sub>2</sub> MgPtI <sub>6</sub>  | 0.00 | Cs <sub>2</sub> ZnPtI <sub>6</sub>  | 0.01 |
| Cs <sub>2</sub> PbPdBr <sub>6</sub> | 0.00 | Cs <sub>2</sub> FeIrI <sub>6</sub>  | 0.00 | Cs <sub>2</sub> GeIrBr <sub>6</sub> | 0.00 | Cs <sub>2</sub> CdPdCl <sub>6</sub> | 0.01 |
| Cs <sub>2</sub> CoPdI <sub>6</sub>  | 0.00 | Cs <sub>2</sub> PbPdCl <sub>6</sub> | 0.00 | Cs <sub>2</sub> CuPtCl <sub>6</sub> | 0.00 | Cs <sub>2</sub> SnPtBr <sub>6</sub> | 0.01 |
| Cs <sub>2</sub> SrCoCl <sub>6</sub> | 0.00 | Cs <sub>2</sub> CoCuCl <sub>6</sub> | 0.00 | Cs <sub>2</sub> MnCuF <sub>6</sub>  | 0.01 | Cs <sub>2</sub> CdNiI <sub>6</sub>  | 0.01 |
| Cs <sub>2</sub> CdIrCl <sub>6</sub> | 0.00 | Cs <sub>2</sub> BaCuCl <sub>6</sub> | 0.00 | Cs <sub>2</sub> NiZnCl <sub>6</sub> | 0.01 | Cs <sub>2</sub> CdPbCl <sub>6</sub> | 0.01 |
| Cs <sub>2</sub> BeNiI <sub>6</sub>  | 0.00 | Cs <sub>2</sub> MgIrF <sub>6</sub>  | 0.00 | Cs <sub>2</sub> PbNiI <sub>6</sub>  | 0.01 | Cs <sub>2</sub> MnNiI <sub>6</sub>  | 0.01 |
| Cs <sub>2</sub> CaTeF <sub>6</sub>  | 0.00 | Cs <sub>2</sub> SnPdCl <sub>6</sub> | 0.00 | Cs <sub>2</sub> BeCuCl <sub>6</sub> | 0.01 | Cs <sub>2</sub> CdIrBr <sub>6</sub> | 0.01 |
| Cs <sub>2</sub> SrCoI <sub>6</sub>  | 0.00 | Cs <sub>2</sub> NiTeBr <sub>6</sub> | 0.00 | Cs <sub>2</sub> CaTeCl <sub>6</sub> | 0.01 | Cs <sub>2</sub> BePtI <sub>6</sub>  | 0.01 |
| Cs <sub>2</sub> SnPdBr <sub>6</sub> | 0.00 | Cs <sub>2</sub> CdCoBr <sub>6</sub> | 0.00 | Cs <sub>2</sub> SnIrCl <sub>6</sub> | 0.01 | Cs <sub>2</sub> CdPtBr <sub>6</sub> | 0.01 |
| Cs <sub>2</sub> BeCuBr <sub>6</sub> | 0.00 | Cs <sub>2</sub> SrIrF <sub>6</sub>  | 0.00 | Cs <sub>2</sub> GeNiCl <sub>6</sub> | 0.01 | Cs <sub>2</sub> FeIrBr <sub>6</sub> | 0.01 |
| Cs <sub>2</sub> CuZnCl <sub>6</sub> | 0.00 | Cs <sub>2</sub> CdPdI <sub>6</sub>  | 0.00 | Cs <sub>2</sub> BaIrBr <sub>6</sub> | 0.01 | Cs <sub>2</sub> MgTeBr <sub>6</sub> | 0.01 |
| Cs <sub>2</sub> CuPdBr <sub>6</sub> | 0.00 | Cs <sub>2</sub> GeNiBr <sub>6</sub> | 0.00 | Cs <sub>2</sub> PdTeBr <sub>6</sub> | 0.01 | Cs <sub>2</sub> CuTeBr <sub>6</sub> | 0.01 |
| Cs <sub>2</sub> CdNiBr <sub>6</sub> | 0.00 | Cs <sub>2</sub> MgCuBr <sub>6</sub> | 0.00 | Cs <sub>2</sub> CdTeCl <sub>6</sub> | 0.01 | Cs <sub>2</sub> BePtBr <sub>6</sub> | 0.01 |
| Cs <sub>2</sub> CdCuBr <sub>6</sub> | 0.00 | Cs <sub>2</sub> BaTeCl <sub>6</sub> | 0.00 | Cs <sub>2</sub> ZnPdBr <sub>6</sub> | 0.01 | Cs <sub>2</sub> SnPtF <sub>6</sub>  | 0.01 |
| Cs <sub>2</sub> MgTeF <sub>6</sub>  | 0.00 | Cs <sub>2</sub> PdIrCl <sub>6</sub> | 0.00 | Cs <sub>2</sub> CuZnF <sub>6</sub>  | 0.01 | Cs <sub>2</sub> CoTeI <sub>6</sub>  | 0.01 |
| Cs <sub>2</sub> MnPdI <sub>6</sub>  | 0.00 | Cs <sub>2</sub> CuTeI <sub>6</sub>  | 0.00 | Cs <sub>2</sub> GeTeF <sub>6</sub>  | 0.01 | Cs <sub>2</sub> BeTeCl <sub>6</sub> | 0.01 |
| Cs <sub>2</sub> SnTeCl <sub>6</sub> | 0.00 | Cs <sub>2</sub> GePtCl <sub>6</sub> | 0.00 | Cs <sub>2</sub> GeTeCl <sub>6</sub> | 0.01 | Cs <sub>2</sub> MgTeI <sub>6</sub>  | 0.01 |
| Cs <sub>2</sub> MgCoBr <sub>6</sub> | 0.00 | Cs <sub>2</sub> PbTeI <sub>6</sub>  | 0.00 | Cs <sub>2</sub> MnIrF <sub>6</sub>  | 0.01 | Cs <sub>2</sub> MgPdI <sub>6</sub>  | 0.01 |
| Cs <sub>2</sub> SrCuCl <sub>6</sub> | 0.00 | Cs <sub>2</sub> CaPdI <sub>6</sub>  | 0.00 | Cs <sub>2</sub> PbTeBr <sub>6</sub> | 0.01 | Cs <sub>2</sub> CuPtF <sub>6</sub>  | 0.01 |
| Cs <sub>2</sub> MnTeBr <sub>6</sub> | 0.00 | Cs <sub>2</sub> PbNiBr <sub>6</sub> | 0.00 | Cs <sub>2</sub> MnCuCl <sub>6</sub> | 0.01 | Cs <sub>2</sub> FePtBr <sub>6</sub> | 0.01 |
| Cs <sub>2</sub> FeCoCl <sub>6</sub> | 0.00 | Cs <sub>2</sub> NiZnI <sub>6</sub>  | 0.00 | Cs <sub>2</sub> BaTeI <sub>6</sub>  | 0.01 | Cs <sub>2</sub> GeTeI <sub>6</sub>  | 0.01 |
| Cs <sub>2</sub> GePtI <sub>6</sub>  | 0.00 | Cs <sub>2</sub> MgPtCl <sub>6</sub> | 0.00 | Cs <sub>2</sub> CoNiI <sub>6</sub>  | 0.01 | Cs <sub>2</sub> NiZnBr <sub>6</sub> | 0.01 |
| Cs <sub>2</sub> BeIrF <sub>6</sub>  | 0.00 | Cs <sub>2</sub> CaTeBr <sub>6</sub> | 0.00 | Cs <sub>2</sub> NiIrF <sub>6</sub>  | 0.01 | Cs <sub>2</sub> MnZnI <sub>6</sub>  | 0.01 |
| Cs <sub>2</sub> CdCuI <sub>6</sub>  | 0.00 | Cs <sub>2</sub> NiCuI <sub>6</sub>  | 0.00 | Cs <sub>2</sub> SnNiBr <sub>6</sub> | 0.01 | Cs <sub>2</sub> SnTeBr <sub>6</sub> | 0.01 |
| Cs <sub>2</sub> GeTeBr <sub>6</sub> | 0.00 | Cs <sub>2</sub> BeTeBr <sub>6</sub> | 0.00 | Cs <sub>2</sub> NiPdCl <sub>6</sub> | 0.01 | Cs <sub>2</sub> CuPdCl <sub>6</sub> | 0.01 |
| Cs <sub>2</sub> CoTeCl <sub>6</sub> | 0.00 | Cs <sub>2</sub> FePdI <sub>6</sub>  | 0.00 | Cs <sub>2</sub> CuZnI <sub>6</sub>  | 0.01 | Cs <sub>2</sub> BeTeI <sub>6</sub>  | 0.01 |
| Cs <sub>2</sub> CuZnBr <sub>6</sub> | 0.00 | Cs <sub>2</sub> CuPdI <sub>6</sub>  | 0.00 | Cs <sub>2</sub> NiPtBr <sub>6</sub> | 0.01 | Cs <sub>2</sub> CdTeI <sub>6</sub>  | 0.01 |
| Cs <sub>2</sub> CdTeBr <sub>6</sub> | 0.00 | Cs <sub>2</sub> SrTeBr <sub>6</sub> | 0.00 | Cs <sub>2</sub> PbPtI <sub>6</sub>  | 0.01 | Cs <sub>2</sub> ZnIrBr <sub>6</sub> | 0.01 |
| Cs <sub>2</sub> BeCuF <sub>6</sub>  | 0.00 | Cs <sub>2</sub> PbIrCl <sub>6</sub> | 0.00 | Cs <sub>2</sub> SrPtI <sub>6</sub>  | 0.01 | Cs <sub>2</sub> CdIrF <sub>6</sub>  | 0.01 |
| Cs <sub>2</sub> MgCoI <sub>6</sub>  | 0.00 | Cs <sub>2</sub> SrCuBr <sub>6</sub> | 0.00 | Cs <sub>2</sub> SrCuI <sub>6</sub>  | 0.01 | Cs <sub>2</sub> PbIrI <sub>6</sub>  | 0.01 |
| Cs <sub>2</sub> BaPdI <sub>6</sub>  | 0.00 | Cs <sub>2</sub> MnIrCl <sub>6</sub> | 0.00 | Cs <sub>2</sub> BePdCl <sub>6</sub> | 0.01 | Cs <sub>2</sub> BePtCl <sub>6</sub> | 0.01 |
| Cs <sub>2</sub> CaCuBr <sub>6</sub> | 0.00 | Cs <sub>2</sub> NiPdBr <sub>6</sub> | 0.00 | Cs <sub>2</sub> SnPdF <sub>6</sub>  | 0.01 | Cs <sub>2</sub> BaIrI <sub>6</sub>  | 0.01 |
| Cs <sub>2</sub> CoPdBr <sub>6</sub> | 0.00 | Cs <sub>2</sub> BeTeF <sub>6</sub>  | 0.00 | Cs <sub>2</sub> BaIrCl <sub>6</sub> | 0.01 | Cs <sub>2</sub> MnIrI <sub>6</sub>  | 0.01 |
| Cs <sub>2</sub> NiPtCl <sub>6</sub> | 0.00 | Cs <sub>2</sub> SrIrBr <sub>6</sub> | 0.00 | Cs <sub>2</sub> CdPdBr <sub>6</sub> | 0.01 | Cs <sub>2</sub> PtTeCl <sub>6</sub> | 0.01 |
| Cs <sub>2</sub> BeCoCl <sub>6</sub> | 0.00 | Cs <sub>2</sub> MnTeCl <sub>6</sub> | 0.00 | Cs <sub>2</sub> CuTeF <sub>6</sub>  | 0.01 | Cs <sub>2</sub> ZnTeBr <sub>6</sub> | 0.01 |
| Cs <sub>2</sub> MgCoCl <sub>6</sub> | 0.00 | Cs <sub>2</sub> FeIrCl <sub>6</sub> | 0.00 | Cs <sub>2</sub> FeNiF <sub>6</sub>  | 0.01 | Cs <sub>2</sub> PbPtCl <sub>6</sub> | 0.01 |



| Material                            | Gap  | Material                            | Gap  | Material                            | Gap  | Material                            | Gap  |
|-------------------------------------|------|-------------------------------------|------|-------------------------------------|------|-------------------------------------|------|
| Cs <sub>2</sub> MgTeCl <sub>6</sub> | 0.01 | Cs <sub>2</sub> CdIrI <sub>6</sub>  | 0.02 | Cs <sub>2</sub> IrTeF <sub>6</sub>  | 0.12 | Cs <sub>2</sub> GeZnI <sub>6</sub>  | 0.52 |
| Cs <sub>2</sub> ZnPtBr <sub>6</sub> | 0.01 | Cs <sub>2</sub> PdPtBr <sub>6</sub> | 0.02 | Cs <sub>2</sub> SrPdBr <sub>6</sub> | 0.13 | Cs <sub>2</sub> CdMnBr <sub>6</sub> | 0.52 |
| Cs <sub>2</sub> SnPtI <sub>6</sub>  | 0.01 | Cs <sub>2</sub> GeNiI <sub>6</sub>  | 0.02 | Cs <sub>2</sub> FeCuF <sub>6</sub>  | 0.13 | Cs <sub>2</sub> BaPtCl <sub>6</sub> | 0.53 |
| Cs <sub>2</sub> CuPtI <sub>6</sub>  | 0.01 | Cs <sub>2</sub> ZnTeCl <sub>6</sub> | 0.02 | Cs <sub>2</sub> MnPdF <sub>6</sub>  | 0.15 | Cs <sub>2</sub> CdSnI <sub>6</sub>  | 0.54 |
| Cs <sub>2</sub> IrTeBr <sub>6</sub> | 0.01 | Cs <sub>2</sub> NiPtI <sub>6</sub>  | 0.02 | Cs <sub>2</sub> CaPtBr <sub>6</sub> | 0.15 | Cs <sub>2</sub> MnNiCl <sub>6</sub> | 0.59 |
| Cs <sub>2</sub> PtTeBr <sub>6</sub> | 0.01 | Cs <sub>2</sub> PdTeCl <sub>6</sub> | 0.02 | Cs <sub>2</sub> PbNiCl <sub>6</sub> | 0.17 | Cs <sub>2</sub> CdGeI <sub>6</sub>  | 0.60 |
| Cs <sub>2</sub> ZnTeI <sub>6</sub>  | 0.01 | Cs <sub>2</sub> SnIrI <sub>6</sub>  | 0.02 | Cs <sub>2</sub> BaPdBr <sub>6</sub> | 0.18 | Cs <sub>2</sub> SnMnI <sub>6</sub>  | 0.61 |
| Cs <sub>2</sub> MnCuBr <sub>6</sub> | 0.01 | Cs <sub>2</sub> GePtBr <sub>6</sub> | 0.03 | Cs <sub>2</sub> SrPtBr <sub>6</sub> | 0.18 | Cs <sub>2</sub> MgNiCl <sub>6</sub> | 0.61 |
| Cs <sub>2</sub> MnPtCl <sub>6</sub> | 0.01 | Cs <sub>2</sub> SnCuF <sub>6</sub>  | 0.03 | Cs <sub>2</sub> BeMnI <sub>6</sub>  | 0.23 | Cs <sub>2</sub> SnNiF <sub>6</sub>  | 0.65 |
| Cs <sub>2</sub> MnTeF <sub>6</sub>  | 0.01 | Cs <sub>2</sub> CaIrI <sub>6</sub>  | 0.03 | Cs <sub>2</sub> BaPtBr <sub>6</sub> | 0.24 | Cs <sub>2</sub> BePdF <sub>6</sub>  | 0.66 |
| Cs <sub>2</sub> PbIrF <sub>6</sub>  | 0.01 | Cs <sub>2</sub> FeZnI <sub>6</sub>  | 0.03 | Cs <sub>2</sub> MgNiBr <sub>6</sub> | 0.25 | Cs <sub>2</sub> CaNiBr <sub>6</sub> | 0.66 |
| Cs <sub>2</sub> MnPdBr <sub>6</sub> | 0.01 | Cs <sub>2</sub> GeIrCl <sub>6</sub> | 0.03 | Cs <sub>2</sub> CaNiI <sub>6</sub>  | 0.25 | Cs <sub>2</sub> GeMnI <sub>6</sub>  | 0.69 |
| Cs <sub>2</sub> SnNiCl <sub>6</sub> | 0.01 | Cs <sub>2</sub> PdPtI <sub>6</sub>  | 0.03 | Cs <sub>2</sub> PdTeF <sub>6</sub>  | 0.26 | Cs <sub>2</sub> SrNiBr <sub>6</sub> | 0.71 |
| Cs <sub>2</sub> CuIrBr <sub>6</sub> | 0.01 | Cs <sub>2</sub> PbCuCl <sub>6</sub> | 0.03 | Cs <sub>2</sub> MnNiF <sub>6</sub>  | 0.28 | Cs <sub>2</sub> MnPtF <sub>6</sub>  | 0.72 |
| Cs <sub>2</sub> NiCuF <sub>6</sub>  | 0.01 | Cs <sub>2</sub> CdFeI <sub>6</sub>  | 0.03 | Cs <sub>2</sub> SrNiI <sub>6</sub>  | 0.30 | Cs <sub>2</sub> BaNiBr <sub>6</sub> | 0.72 |
| Cs <sub>2</sub> MnPtI <sub>6</sub>  | 0.01 | Cs <sub>2</sub> MgIrBr <sub>6</sub> | 0.03 | Cs <sub>2</sub> BeNiCl <sub>6</sub> | 0.30 | Cs <sub>2</sub> PbSnI <sub>6</sub>  | 0.77 |
| Cs <sub>2</sub> PbCuI <sub>6</sub>  | 0.01 | Cs <sub>2</sub> SrIrI <sub>6</sub>  | 0.03 | Cs <sub>2</sub> PtTeF <sub>6</sub>  | 0.31 | Cs <sub>2</sub> GeNiF <sub>6</sub>  | 0.79 |
| Cs <sub>2</sub> SnIrF <sub>6</sub>  | 0.01 | Cs <sub>2</sub> CdNiCl <sub>6</sub> | 0.03 | Cs <sub>2</sub> SnGeBr <sub>6</sub> | 0.32 | Cs <sub>2</sub> CdBeBr <sub>6</sub> | 0.79 |
| Cs <sub>2</sub> MnPtBr <sub>6</sub> | 0.01 | Cs <sub>2</sub> SnCuBr <sub>6</sub> | 0.03 | Cs <sub>2</sub> SnBaBr <sub>6</sub> | 0.32 | Cs <sub>2</sub> FeTeF <sub>6</sub>  | 0.82 |
| Cs <sub>2</sub> CdMnI <sub>6</sub>  | 0.02 | Cs <sub>2</sub> SnIrBr <sub>6</sub> | 0.03 | Cs <sub>2</sub> SnGeI <sub>6</sub>  | 0.36 | Cs <sub>2</sub> NiPtF <sub>6</sub>  | 0.83 |
| Cs <sub>2</sub> CuPtBr <sub>6</sub> | 0.02 | Cs <sub>2</sub> GeCuBr <sub>6</sub> | 0.04 | Cs <sub>2</sub> SrPdCl <sub>6</sub> | 0.36 | Cs <sub>2</sub> PbGeI <sub>6</sub>  | 0.84 |
| Cs <sub>2</sub> PdTeI <sub>6</sub>  | 0.02 | Cs <sub>2</sub> MgIrI <sub>6</sub>  | 0.04 | Cs <sub>2</sub> CdPdF <sub>6</sub>  | 0.37 | Cs <sub>2</sub> PbGeBr <sub>6</sub> | 0.86 |
| Cs <sub>2</sub> BeIrI <sub>6</sub>  | 0.02 | Cs <sub>2</sub> BeIrBr <sub>6</sub> | 0.04 | Cs <sub>2</sub> BaNiI <sub>6</sub>  | 0.38 | Cs <sub>2</sub> SnGeCl <sub>6</sub> | 0.86 |
| Cs <sub>2</sub> FePtI <sub>6</sub>  | 0.02 | Cs <sub>2</sub> FeCoF <sub>6</sub>  | 0.04 | Cs <sub>2</sub> CdMgI <sub>6</sub>  | 0.38 | Cs <sub>2</sub> BePtF <sub>6</sub>  | 0.87 |
| Cs <sub>2</sub> GeIrI <sub>6</sub>  | 0.02 | Cs <sub>2</sub> PbIrBr <sub>6</sub> | 0.04 | Cs <sub>2</sub> CdPtF <sub>6</sub>  | 0.39 | Cs <sub>2</sub> GeBeI <sub>6</sub>  | 0.88 |
| Cs <sub>2</sub> MnCoBr <sub>6</sub> | 0.02 | Cs <sub>2</sub> MgIrCl <sub>6</sub> | 0.04 | Cs <sub>2</sub> SnZnI <sub>6</sub>  | 0.40 | Cs <sub>2</sub> BeNiF <sub>6</sub>  | 0.92 |
| Cs <sub>2</sub> GePdBr <sub>6</sub> | 0.02 | Cs <sub>2</sub> ZnIrF <sub>6</sub>  | 0.05 | Cs <sub>2</sub> CdCaCl <sub>6</sub> | 0.40 | Cs <sub>2</sub> MgPdF <sub>6</sub>  | 0.95 |
| Cs <sub>2</sub> GeIrF <sub>6</sub>  | 0.02 | Cs <sub>2</sub> GeCuI <sub>6</sub>  | 0.05 | Cs <sub>2</sub> CaPdCl <sub>6</sub> | 0.40 | Cs <sub>2</sub> SnBeI <sub>6</sub>  | 0.95 |
| Cs <sub>2</sub> MnCuI <sub>6</sub>  | 0.02 | Cs <sub>2</sub> PdIrI <sub>6</sub>  | 0.05 | Cs <sub>2</sub> MnZnBr <sub>6</sub> | 0.40 | Cs <sub>2</sub> PbZnI <sub>6</sub>  | 0.96 |
| Cs <sub>2</sub> ZnIrI <sub>6</sub>  | 0.02 | Cs <sub>2</sub> PbCuBr <sub>6</sub> | 0.06 | Cs <sub>2</sub> CuIrCl <sub>6</sub> | 0.43 | Cs <sub>2</sub> CdNiF <sub>6</sub>  | 0.97 |
| Cs <sub>2</sub> PbPtBr <sub>6</sub> | 0.02 | Cs <sub>2</sub> SnCuI <sub>6</sub>  | 0.06 | Cs <sub>2</sub> NiPdF <sub>6</sub>  | 0.43 | Cs <sub>2</sub> NiZnF <sub>6</sub>  | 1.01 |
| Cs <sub>2</sub> GePdI <sub>6</sub>  | 0.02 | Cs <sub>2</sub> MgZnI <sub>6</sub>  | 0.06 | Cs <sub>2</sub> BaPdCl <sub>6</sub> | 0.46 | Cs <sub>2</sub> MgMnI <sub>6</sub>  | 1.01 |
| Cs <sub>2</sub> GeCuF <sub>6</sub>  | 0.02 | Cs <sub>2</sub> ZnIrCl <sub>6</sub> | 0.07 | Cs <sub>2</sub> PbPtF <sub>6</sub>  | 0.47 | Cs <sub>2</sub> CaNiCl <sub>6</sub> | 1.02 |
| Cs <sub>2</sub> IrTeI <sub>6</sub>  | 0.02 | Cs <sub>2</sub> MnPdCl <sub>6</sub> | 0.08 | Cs <sub>2</sub> CaPtCl <sub>6</sub> | 0.48 | Cs <sub>2</sub> SrNiCl <sub>6</sub> | 1.04 |
| Cs <sub>2</sub> PtTeI <sub>6</sub>  | 0.02 | Cs <sub>2</sub> CdBeI <sub>6</sub>  | 0.08 | Cs <sub>2</sub> BeMgI <sub>6</sub>  | 0.48 | Cs <sub>2</sub> CuIrF <sub>6</sub>  | 1.05 |
| Cs <sub>2</sub> PdPtCl <sub>6</sub> | 0.02 | Cs <sub>2</sub> GePtF <sub>6</sub>  | 0.08 | Cs <sub>2</sub> BeZnBr <sub>6</sub> | 0.49 | Cs <sub>2</sub> BaNiCl <sub>6</sub> | 1.06 |
| Cs <sub>2</sub> NiPdI <sub>6</sub>  | 0.02 | Cs <sub>2</sub> SnCuCl <sub>6</sub> | 0.08 | Cs <sub>2</sub> ZnPdF <sub>6</sub>  | 0.49 | Cs <sub>2</sub> BaPdF <sub>6</sub>  | 1.07 |
| Cs <sub>2</sub> CuIrI <sub>6</sub>  | 0.02 | Cs <sub>2</sub> CaPdBr <sub>6</sub> | 0.08 | Cs <sub>2</sub> ZnPtF <sub>6</sub>  | 0.49 | Cs <sub>2</sub> SnZnBr <sub>6</sub> | 1.09 |
| Cs <sub>2</sub> SnPdI <sub>6</sub>  | 0.02 | Cs <sub>2</sub> GeCuCl <sub>6</sub> | 0.08 | Cs <sub>2</sub> CdZnBr <sub>6</sub> | 0.49 | Cs <sub>2</sub> PbSnBr <sub>6</sub> | 1.09 |
| Cs <sub>2</sub> BePdI <sub>6</sub>  | 0.02 | Cs <sub>2</sub> CdZnI <sub>6</sub>  | 0.10 | Cs <sub>2</sub> SrPtCl <sub>6</sub> | 0.50 | Cs <sub>2</sub> PbMnI <sub>6</sub>  | 1.11 |

| Material                            | Gap  | Material                            | Gap  | Material                            | Gap  | Material                            | Gap  |
|-------------------------------------|------|-------------------------------------|------|-------------------------------------|------|-------------------------------------|------|
| Cs <sub>2</sub> PbNiF <sub>6</sub>  | 1.12 | Cs <sub>2</sub> SnBeBr <sub>6</sub> | 1.73 | Cs <sub>2</sub> CaMnCl <sub>6</sub> | 2.52 | Cs <sub>2</sub> SnZnF <sub>6</sub>  | 3.36 |
| Cs <sub>2</sub> MgPtF <sub>6</sub>  | 1.12 | Cs <sub>2</sub> GeBeBr <sub>6</sub> | 1.75 | Cs <sub>2</sub> SnBeCl <sub>6</sub> | 2.53 | Cs <sub>2</sub> CdZnF <sub>6</sub>  | 3.36 |
| Cs <sub>2</sub> GeZnBr <sub>6</sub> | 1.13 | Cs <sub>2</sub> CdSnCl <sub>6</sub> | 1.77 | Cs <sub>2</sub> GeBeCl <sub>6</sub> | 2.55 | Cs <sub>2</sub> SnBaCl <sub>6</sub> | 3.46 |
| Cs <sub>2</sub> CdSnBr <sub>6</sub> | 1.14 | Cs <sub>2</sub> PbMnCl <sub>6</sub> | 1.79 | Cs <sub>2</sub> GeCaI <sub>6</sub>  | 2.55 | Cs <sub>2</sub> BeSrBr <sub>6</sub> | 3.49 |
| Cs <sub>2</sub> CdPbI <sub>6</sub>  | 1.14 | Cs <sub>2</sub> CdGeCl <sub>6</sub> | 1.79 | Cs <sub>2</sub> SnSrI <sub>6</sub>  | 2.57 | Cs <sub>2</sub> GeZnF <sub>6</sub>  | 3.55 |
| Cs <sub>2</sub> SrPdF <sub>6</sub>  | 1.15 | Cs <sub>2</sub> SnZnCl <sub>6</sub> | 1.80 | Cs <sub>2</sub> SnBaI <sub>6</sub>  | 2.58 | Cs <sub>2</sub> SnSrCl <sub>6</sub> | 3.56 |
| Cs <sub>2</sub> CaPdF <sub>6</sub>  | 1.16 | Cs <sub>2</sub> SnGeF <sub>6</sub>  | 1.80 | Cs <sub>2</sub> SnCaI <sub>6</sub>  | 2.58 | Cs <sub>2</sub> SrBaI <sub>6</sub>  | 3.61 |
| Cs <sub>2</sub> CdGeBr <sub>6</sub> | 1.19 | Cs <sub>2</sub> CdPbBr <sub>6</sub> | 1.80 | Cs <sub>2</sub> CaZnBr <sub>6</sub> | 2.59 | Cs <sub>2</sub> SnCaCl <sub>6</sub> | 3.61 |
| Cs <sub>2</sub> CdMnCl <sub>6</sub> | 1.19 | Cs <sub>2</sub> GeZnCl <sub>6</sub> | 1.82 | Cs <sub>2</sub> MgZnCl <sub>6</sub> | 2.62 | Cs <sub>2</sub> CdPbF <sub>6</sub>  | 3.65 |
| Cs <sub>2</sub> SnMnBr <sub>6</sub> | 1.19 | Cs <sub>2</sub> CaMnI <sub>6</sub>  | 1.83 | Cs <sub>2</sub> BeBaI <sub>6</sub>  | 2.63 | Cs <sub>2</sub> PbBaBr <sub>6</sub> | 3.65 |
| Cs <sub>2</sub> GeMnBr <sub>6</sub> | 1.21 | Cs <sub>2</sub> MnFeF <sub>6</sub>  | 1.83 | Cs <sub>2</sub> GeSrI <sub>6</sub>  | 2.69 | Cs <sub>2</sub> CaBaI <sub>6</sub>  | 3.67 |
| Cs <sub>2</sub> MgNiF <sub>6</sub>  | 1.21 | Cs <sub>2</sub> BeMgBr <sub>6</sub> | 1.83 | Cs <sub>2</sub> GeBaI <sub>6</sub>  | 2.74 | Cs <sub>2</sub> GeBaCl <sub>6</sub> | 3.69 |
| Cs <sub>2</sub> MnZnCl <sub>6</sub> | 1.22 | Cs <sub>2</sub> BaMnI <sub>6</sub>  | 1.83 | Cs <sub>2</sub> CdSnF <sub>6</sub>  | 2.75 | Cs <sub>2</sub> PbSrBr <sub>6</sub> | 3.71 |
| Cs <sub>2</sub> BeMnBr <sub>6</sub> | 1.24 | Cs <sub>2</sub> SrMnI <sub>6</sub>  | 1.85 | Cs <sub>2</sub> MgCaI <sub>6</sub>  | 2.76 | Cs <sub>2</sub> PbCaBr <sub>6</sub> | 3.71 |
| Cs <sub>2</sub> BaPtF <sub>6</sub>  | 1.25 | Cs <sub>2</sub> CdSrI <sub>6</sub>  | 1.88 | Cs <sub>2</sub> CdMgCl <sub>6</sub> | 2.78 | Cs <sub>2</sub> GeSrCl <sub>6</sub> | 3.74 |
| Cs <sub>2</sub> SrPtF <sub>6</sub>  | 1.32 | Cs <sub>2</sub> BeCaI <sub>6</sub>  | 1.91 | Cs <sub>2</sub> CdCaBr <sub>6</sub> | 2.79 | Cs <sub>2</sub> PbMgCl <sub>6</sub> | 3.76 |
| Cs <sub>2</sub> CdTeF <sub>6</sub>  | 1.33 | Cs <sub>2</sub> CdBeCl <sub>6</sub> | 1.96 | Cs <sub>2</sub> SrZnBr <sub>6</sub> | 2.84 | Cs <sub>2</sub> GeCaCl <sub>6</sub> | 3.77 |
| Cs <sub>2</sub> SnMnCl <sub>6</sub> | 1.33 | Cs <sub>2</sub> PbMgI <sub>6</sub>  | 1.99 | Cs <sub>2</sub> SrMnF <sub>6</sub>  | 2.89 | Cs <sub>2</sub> CaSrI <sub>6</sub>  | 3.77 |
| Cs <sub>2</sub> CaPtF <sub>6</sub>  | 1.33 | Cs <sub>2</sub> BaZnI <sub>6</sub>  | 2.01 | Cs <sub>2</sub> PbCaI <sub>6</sub>  | 2.95 | Cs <sub>2</sub> BeBaBr <sub>6</sub> | 3.83 |
| Cs <sub>2</sub> SrFeF <sub>6</sub>  | 1.35 | Cs <sub>2</sub> MgMnBr <sub>6</sub> | 2.02 | Cs <sub>2</sub> PbMgBr <sub>6</sub> | 2.96 | Cs <sub>2</sub> CdSrCl <sub>6</sub> | 3.97 |
| Cs <sub>2</sub> PbBeI <sub>6</sub>  | 1.37 | Cs <sub>2</sub> PbSnF <sub>6</sub>  | 2.14 | Cs <sub>2</sub> CdGeF <sub>6</sub>  | 2.97 | Cs <sub>2</sub> BeZnF <sub>6</sub>  | 3.98 |
| Cs <sub>2</sub> CaZnI <sub>6</sub>  | 1.37 | Cs <sub>2</sub> BeSrI <sub>6</sub>  | 2.18 | Cs <sub>2</sub> CdSrBr <sub>6</sub> | 3.00 | Cs <sub>2</sub> CaZnCl <sub>6</sub> | 4.00 |
| Cs <sub>2</sub> CaNiF <sub>6</sub>  | 1.39 | Cs <sub>2</sub> BaMnBr <sub>6</sub> | 2.20 | Cs <sub>2</sub> MgSrI <sub>6</sub>  | 3.02 | Cs <sub>2</sub> MgCaBr <sub>6</sub> | 4.00 |
| Cs <sub>2</sub> CdMnF <sub>6</sub>  | 1.41 | Cs <sub>2</sub> BeMnCl <sub>6</sub> | 2.23 | Cs <sub>2</sub> CaMnF <sub>6</sub>  | 3.02 | Cs <sub>2</sub> SnSrF <sub>6</sub>  | 4.01 |
| Cs <sub>2</sub> PbSnCl <sub>6</sub> | 1.41 | Cs <sub>2</sub> SnMnF <sub>6</sub>  | 2.23 | Cs <sub>2</sub> SnMgCl <sub>6</sub> | 3.03 | Cs <sub>2</sub> MgSrBr <sub>6</sub> | 4.06 |
| Cs <sub>2</sub> MgZnBr <sub>6</sub> | 1.42 | Cs <sub>2</sub> MnZnF <sub>6</sub>  | 2.24 | Cs <sub>2</sub> SnSrBr <sub>6</sub> | 3.06 | Cs <sub>2</sub> PbZnF <sub>6</sub>  | 4.11 |
| Cs <sub>2</sub> GeMnCl <sub>6</sub> | 1.46 | Cs <sub>2</sub> SnMgBr <sub>6</sub> | 2.30 | Cs <sub>2</sub> SnCaBr <sub>6</sub> | 3.08 | Cs <sub>2</sub> MgBaBr <sub>6</sub> | 4.12 |
| Cs <sub>2</sub> CdMgBr <sub>6</sub> | 1.46 | Cs <sub>2</sub> SrMnCl <sub>6</sub> | 2.30 | Cs <sub>2</sub> GeMgCl <sub>6</sub> | 3.09 | Cs <sub>2</sub> CdBeF <sub>6</sub>  | 4.13 |
| Cs <sub>2</sub> SrNiF <sub>6</sub>  | 1.46 | Cs <sub>2</sub> BaMnCl <sub>6</sub> | 2.30 | Cs <sub>2</sub> PbSrI <sub>6</sub>  | 3.14 | Cs <sub>2</sub> GeBaF <sub>6</sub>  | 4.17 |
| Cs <sub>2</sub> GeMgI <sub>6</sub>  | 1.51 | Cs <sub>2</sub> CaMnBr <sub>6</sub> | 2.31 | Cs <sub>2</sub> BeMnF <sub>6</sub>  | 3.17 | Cs <sub>2</sub> CaBaBr <sub>6</sub> | 4.20 |
| Cs <sub>2</sub> BaNiF <sub>6</sub>  | 1.52 | Cs <sub>2</sub> PbGeF <sub>6</sub>  | 2.31 | Cs <sub>2</sub> PbBaI <sub>6</sub>  | 3.17 | Cs <sub>2</sub> SrBaBr <sub>6</sub> | 4.20 |
| Cs <sub>2</sub> PbMnBr <sub>6</sub> | 1.56 | Cs <sub>2</sub> SrMnBr <sub>6</sub> | 2.33 | Cs <sub>2</sub> MgMnF <sub>6</sub>  | 3.19 | Cs <sub>2</sub> PbBaCl <sub>6</sub> | 4.20 |
| Cs <sub>2</sub> SnMgI <sub>6</sub>  | 1.57 | Cs <sub>2</sub> GeMgBr <sub>6</sub> | 2.35 | Cs <sub>2</sub> GeBaBr <sub>6</sub> | 3.20 | Cs <sub>2</sub> CdBaCl <sub>6</sub> | 4.23 |
| Cs <sub>2</sub> PbGeCl <sub>6</sub> | 1.60 | Cs <sub>2</sub> PbMnF <sub>6</sub>  | 2.35 | Cs <sub>2</sub> GeCaBr <sub>6</sub> | 3.21 | Cs <sub>2</sub> SnBeF <sub>6</sub>  | 4.25 |
| Cs <sub>2</sub> SrZnI <sub>6</sub>  | 1.64 | Cs <sub>2</sub> GeMnF <sub>6</sub>  | 2.37 | Cs <sub>2</sub> BaZnBr <sub>6</sub> | 3.22 | Cs <sub>2</sub> SnCaF <sub>6</sub>  | 4.25 |
| Cs <sub>2</sub> CdZnCl <sub>6</sub> | 1.65 | Cs <sub>2</sub> PbBeBr <sub>6</sub> | 2.37 | Cs <sub>2</sub> PbBeCl <sub>6</sub> | 3.22 | Cs <sub>2</sub> PbSrCl <sub>6</sub> | 4.28 |
| Cs <sub>2</sub> ZnTeF <sub>6</sub>  | 1.68 | Cs <sub>2</sub> CdBaI <sub>6</sub>  | 2.42 | Cs <sub>2</sub> BeMgCl <sub>6</sub> | 3.23 | Cs <sub>2</sub> CaSrBr <sub>6</sub> | 4.28 |
| Cs <sub>2</sub> CdCaI <sub>6</sub>  | 1.68 | Cs <sub>2</sub> BaMnF <sub>6</sub>  | 2.43 | Cs <sub>2</sub> BeCaBr <sub>6</sub> | 3.30 | Cs <sub>2</sub> PbCaCl <sub>6</sub> | 4.32 |
| Cs <sub>2</sub> BeZnCl <sub>6</sub> | 1.70 | Cs <sub>2</sub> MgMnCl <sub>6</sub> | 2.45 | Cs <sub>2</sub> CdBaBr <sub>6</sub> | 3.31 | Cs <sub>2</sub> SrZnCl <sub>6</sub> | 4.38 |
| Cs <sub>2</sub> PbZnBr <sub>6</sub> | 1.71 | Cs <sub>2</sub> PbZnCl <sub>6</sub> | 2.46 | Cs <sub>2</sub> MgBaI <sub>6</sub>  | 3.33 | Cs <sub>2</sub> BaZnCl <sub>6</sub> | 4.38 |

| Material                            | Gap  | Material            | Gap  | Material            | Gap  |
|-------------------------------------|------|---------------------|------|---------------------|------|
| Cs <sub>2</sub> SnMgF <sub>6</sub>  | 4.44 | CsSnCl <sub>3</sub> | 0.80 | CsNiCl <sub>3</sub> | 0.01 |
| Cs <sub>2</sub> GeSrF <sub>6</sub>  | 4.53 | CsSnBr <sub>3</sub> | 0.56 | CsNiBr <sub>3</sub> | 0.01 |
| Cs <sub>2</sub> GeBeF <sub>6</sub>  | 4.55 | CsSnI <sub>3</sub>  | 0.28 | CsNiI <sub>3</sub>  | 0.07 |
| Cs <sub>2</sub> CdMgF <sub>6</sub>  | 4.68 | CsGeF <sub>3</sub>  | 1.89 | CsCuF <sub>3</sub>  | 0.01 |
| Cs <sub>2</sub> GeCaF <sub>6</sub>  | 4.76 | CsGeCl <sub>3</sub> | 0.91 | CsCuCl <sub>3</sub> | 0.03 |
| Cs <sub>2</sub> SrBaCl <sub>6</sub> | 4.79 | CsGeBr <sub>3</sub> | 0.60 | CsCuBr <sub>3</sub> | 0.04 |
| Cs <sub>2</sub> CdBaF <sub>6</sub>  | 4.79 | CsGeI <sub>3</sub>  | 0.44 | CsCuI <sub>3</sub>  | 0.04 |
| Cs <sub>2</sub> PbSrF <sub>6</sub>  | 4.82 | CsBeF <sub>3</sub>  | 5.43 | CsZnF <sub>3</sub>  | 3.60 |
| Cs <sub>2</sub> GeMgF <sub>6</sub>  | 4.86 | CsBeCl <sub>3</sub> | 2.33 | CsZnCl <sub>3</sub> | 1.17 |
| Cs <sub>2</sub> BeCaCl <sub>6</sub> | 4.86 | CsBeBr <sub>3</sub> | 0.88 | CsZnBr <sub>3</sub> | 0.18 |
| Cs <sub>2</sub> BeSrCl <sub>6</sub> | 4.97 | CsBeI <sub>3</sub>  | 0.06 | CsZnI <sub>3</sub>  | 0.09 |
| Cs <sub>2</sub> MgBaCl <sub>6</sub> | 4.97 | CsMgF <sub>3</sub>  | 6.80 | CsPdF <sub>3</sub>  | 0.04 |
| Cs <sub>2</sub> PbBeF <sub>6</sub>  | 5.01 | CsMgCl <sub>3</sub> | 3.87 | CsPdCl <sub>3</sub> | 0.01 |
| Cs <sub>2</sub> CaBaCl <sub>6</sub> | 5.04 | CsMgBr <sub>3</sub> | 2.69 | CsPdBr <sub>3</sub> | 0.00 |
| Cs <sub>2</sub> CdSrF <sub>6</sub>  | 5.07 | CsMgI <sub>3</sub>  | 1.19 | CsPdI <sub>3</sub>  | 0.03 |
| Cs <sub>2</sub> BeBaCl <sub>6</sub> | 5.07 | CsCaF <sub>3</sub>  | 7.20 | CsIrF <sub>3</sub>  | 0.01 |
| Cs <sub>2</sub> PbCaF <sub>6</sub>  | 5.08 | CsCaCl <sub>3</sub> | 5.43 | CsIrCl <sub>3</sub> | 0.01 |
| Cs <sub>2</sub> MgSrCl <sub>6</sub> | 5.16 | CsCaBr <sub>3</sub> | 4.60 | CsIrBr <sub>3</sub> | 0.00 |
| Cs <sub>2</sub> BaZnF <sub>6</sub>  | 5.16 | CsCaI <sub>3</sub>  | 3.70 | CsIrI <sub>3</sub>  | 0.00 |
| Cs <sub>2</sub> CaSrCl <sub>6</sub> | 5.22 | CsSrF <sub>3</sub>  | 6.34 | CsPtF <sub>3</sub>  | 0.01 |
| Cs <sub>2</sub> CdCaF <sub>6</sub>  | 5.29 | CsSrCl <sub>3</sub> | 5.16 | CsPtCl <sub>3</sub> | 0.03 |
| Cs <sub>2</sub> PbMgF <sub>6</sub>  | 5.30 | CsSrBr <sub>3</sub> | 4.27 | CsPtBr <sub>3</sub> | 0.01 |
| Cs <sub>2</sub> MgCaCl <sub>6</sub> | 5.33 | CsSrI <sub>3</sub>  | 3.64 | CsPtI <sub>3</sub>  | 0.14 |
| Cs <sub>2</sub> MgZnF <sub>6</sub>  | 5.39 | CsBaF <sub>3</sub>  | 5.20 | CsTeF <sub>3</sub>  | 0.00 |
| Cs <sub>2</sub> SrZnF <sub>6</sub>  | 5.49 | CsBaCl <sub>3</sub> | 4.74 | CsTeCl <sub>3</sub> | 0.03 |
| Cs <sub>2</sub> CaZnF <sub>6</sub>  | 5.74 | CsBaBr <sub>3</sub> | 4.03 | CsTeBr <sub>3</sub> | 0.02 |
| Cs <sub>2</sub> BeMgF <sub>6</sub>  | 6.09 | CsBaI <sub>3</sub>  | 3.57 | CsTeI <sub>3</sub>  | 0.01 |
| Cs <sub>2</sub> CaBaF <sub>6</sub>  | 6.19 | CsMnF <sub>3</sub>  | 2.06 |                     |      |
| Cs <sub>2</sub> CaSrF <sub>6</sub>  | 6.59 | CsMnCl <sub>3</sub> | 1.33 |                     |      |
| Cs <sub>2</sub> MgBaF <sub>6</sub>  | 6.72 | CsMnBr <sub>3</sub> | 0.93 |                     |      |
| Cs <sub>2</sub> BeBaF <sub>6</sub>  | 6.72 | CsMnI <sub>3</sub>  | 0.14 |                     |      |
| Cs <sub>2</sub> MgSrF <sub>6</sub>  | 6.95 | CsSnF <sub>3</sub>  | 0.02 |                     |      |
| Cs <sub>2</sub> BeSrF <sub>6</sub>  | 7.02 | CsSnCl <sub>3</sub> | 0.01 |                     |      |
| Cs <sub>2</sub> MgCaF <sub>6</sub>  | 7.04 | CsSnBr <sub>3</sub> | 0.00 |                     |      |
| Cs <sub>2</sub> BeCaF <sub>6</sub>  | 7.55 | CsSnI <sub>3</sub>  | 0.00 |                     |      |
| CsPbF <sub>3</sub>                  | 2.76 | CsCoF <sub>3</sub>  | 0.00 |                     |      |
| CsPbCl <sub>3</sub>                 | 1.98 | CsCoCl <sub>3</sub> | 0.01 |                     |      |
| CsPbBr <sub>3</sub>                 | 1.68 | CsCoBr <sub>3</sub> | 0.00 |                     |      |
| CsPbI <sub>3</sub>                  | 1.38 | CsCoI <sub>3</sub>  | 0.02 |                     |      |
| CsSnF <sub>3</sub>                  | 1.62 | CsNiF <sub>3</sub>  | 0.34 |                     |      |

**Table S9.** The band gaps for HSE functional

| Material                            | Gap  | Class    | Material                            | Gap  | Class    |
|-------------------------------------|------|----------|-------------------------------------|------|----------|
| Cs <sub>2</sub> PbSnI <sub>6</sub>  | 1.19 | Direct   | Cs <sub>2</sub> BeMnBr <sub>6</sub> | 2.66 | Direct   |
| Cs <sub>2</sub> PbGeI <sub>6</sub>  | 1.26 | Direct   | Cs <sub>2</sub> CdMgBr <sub>6</sub> | 2.68 | Direct   |
| Cs <sub>2</sub> GeBeI <sub>6</sub>  | 1.34 | Indirect | Cs <sub>2</sub> SnMnCl <sub>6</sub> | 2.88 | Indirect |
| Cs <sub>2</sub> PbGeBr <sub>6</sub> | 1.39 | Direct   | Cs <sub>2</sub> PbMnBr <sub>6</sub> | 2.89 | Indirect |
| Cs <sub>2</sub> SnGeCl <sub>6</sub> | 1.40 | Direct   | Cs <sub>2</sub> GeMnCl <sub>6</sub> | 2.91 | Indirect |
| Cs <sub>2</sub> SnBeI <sub>6</sub>  | 1.43 | Indirect | Cs <sub>2</sub> CdMnCl <sub>6</sub> | 3.03 | Direct   |
| Cs <sub>2</sub> PbZnI <sub>6</sub>  | 1.65 | Indirect | Cs <sub>2</sub> SrZnI <sub>6</sub>  | 3.07 | Direct   |
| Cs <sub>2</sub> PbSnBr <sub>6</sub> | 1.65 | Direct   | Cs <sub>2</sub> CdZnCl <sub>6</sub> | 3.07 | Direct   |
| Cs <sub>2</sub> MnPtF <sub>6</sub>  | 1.67 | Direct   | Cs <sub>2</sub> BeZnCl <sub>6</sub> | 3.08 | Direct   |
| Cs <sub>2</sub> CdPbI <sub>6</sub>  | 1.83 | Indirect | Cs <sub>2</sub> MnZnCl <sub>6</sub> | 3.09 | Direct   |
| Cs <sub>2</sub> SnZnBr <sub>6</sub> | 1.87 | Indirect | Cs <sub>2</sub> BePtF <sub>6</sub>  | 3.30 | Direct   |
| Cs <sub>2</sub> CdTeF <sub>6</sub>  | 1.88 | Direct   | Cs <sub>2</sub> NiPtF <sub>6</sub>  | 3.48 | Indirect |
| Cs <sub>2</sub> CdSnBr <sub>6</sub> | 1.89 | Indirect | Cs <sub>2</sub> MgPtF <sub>6</sub>  | 3.63 | Direct   |
| Cs <sub>2</sub> CdBeBr <sub>6</sub> | 1.92 | Direct   | Cs <sub>2</sub> BaPtF <sub>6</sub>  | 3.73 | Indirect |
| Cs <sub>2</sub> GeZnBr <sub>6</sub> | 1.92 | Indirect | Cs <sub>2</sub> MgPdF <sub>6</sub>  | 3.81 | Direct   |
| Cs <sub>2</sub> CdGeBr <sub>6</sub> | 1.96 | Indirect | Cs <sub>2</sub> SrPtF <sub>6</sub>  | 3.83 | Indirect |
| Cs <sub>2</sub> MgMnI <sub>6</sub>  | 1.97 | Direct   | Cs <sub>2</sub> CaPtF <sub>6</sub>  | 3.85 | Indirect |
| Cs <sub>2</sub> PbMnI <sub>6</sub>  | 2.04 | Indirect | Cs <sub>2</sub> CdMnF <sub>6</sub>  | 3.92 | Indirect |
| Cs <sub>2</sub> PbSnCl <sub>6</sub> | 2.05 | Direct   | Cs <sub>2</sub> BaPdF <sub>6</sub>  | 3.95 | Indirect |
| Cs <sub>2</sub> PbBeI <sub>6</sub>  | 2.06 | Indirect | Cs <sub>2</sub> CaPdF <sub>6</sub>  | 4.06 | Indirect |
| Cs <sub>2</sub> FeTeF <sub>6</sub>  | 2.15 | Direct   | Cs <sub>2</sub> SrPdF <sub>6</sub>  | 4.07 | Indirect |
| Cs <sub>2</sub> SnMgI <sub>6</sub>  | 2.15 | Indirect | Cs <sub>2</sub> CaNiCl <sub>6</sub> | 4.14 | Indirect |
| Cs <sub>2</sub> GeMgI <sub>6</sub>  | 2.20 | Indirect | Cs <sub>2</sub> GeNiF <sub>6</sub>  | 4.23 | Indirect |
| Cs <sub>2</sub> SnMnBr <sub>6</sub> | 2.24 | Indirect | Cs <sub>2</sub> SrNiCl <sub>6</sub> | 4.29 | Indirect |
| Cs <sub>2</sub> PbGeCl <sub>6</sub> | 2.28 | Direct   | Cs <sub>2</sub> BaNiCl <sub>6</sub> | 4.34 | Indirect |
| Cs <sub>2</sub> ZnTeF <sub>6</sub>  | 2.31 | Direct   | Cs <sub>2</sub> PbNiF <sub>6</sub>  | 4.96 | Indirect |
| Cs <sub>2</sub> CaZnI <sub>6</sub>  | 2.34 | Direct   | Cs <sub>2</sub> SrFeF <sub>6</sub>  | 5.00 | Direct   |
| Cs <sub>2</sub> SnBeBr <sub>6</sub> | 2.40 | Indirect | Cs <sub>2</sub> BeNiF <sub>6</sub>  | 5.04 | Indirect |
| Cs <sub>2</sub> GeMnBr <sub>6</sub> | 2.44 | Indirect | Cs <sub>2</sub> CdNiF <sub>6</sub>  | 5.49 | Direct   |
| Cs <sub>2</sub> GeBeBr <sub>6</sub> | 2.44 | Indirect | Cs <sub>2</sub> NiZnF <sub>6</sub>  | 5.61 | Direct   |
| Cs <sub>2</sub> CuIrF <sub>6</sub>  | 2.59 | Indirect | Cs <sub>2</sub> MgNiF <sub>6</sub>  | 5.94 | Direct   |
| Cs <sub>2</sub> PbZnBr <sub>6</sub> | 2.63 | Indirect | Cs <sub>2</sub> CaNiF <sub>6</sub>  | 6.20 | Direct   |
| Cs <sub>2</sub> MgZnBr <sub>6</sub> | 2.65 | Direct   | Cs <sub>2</sub> SrNiF <sub>6</sub>  | 6.28 | Direct   |

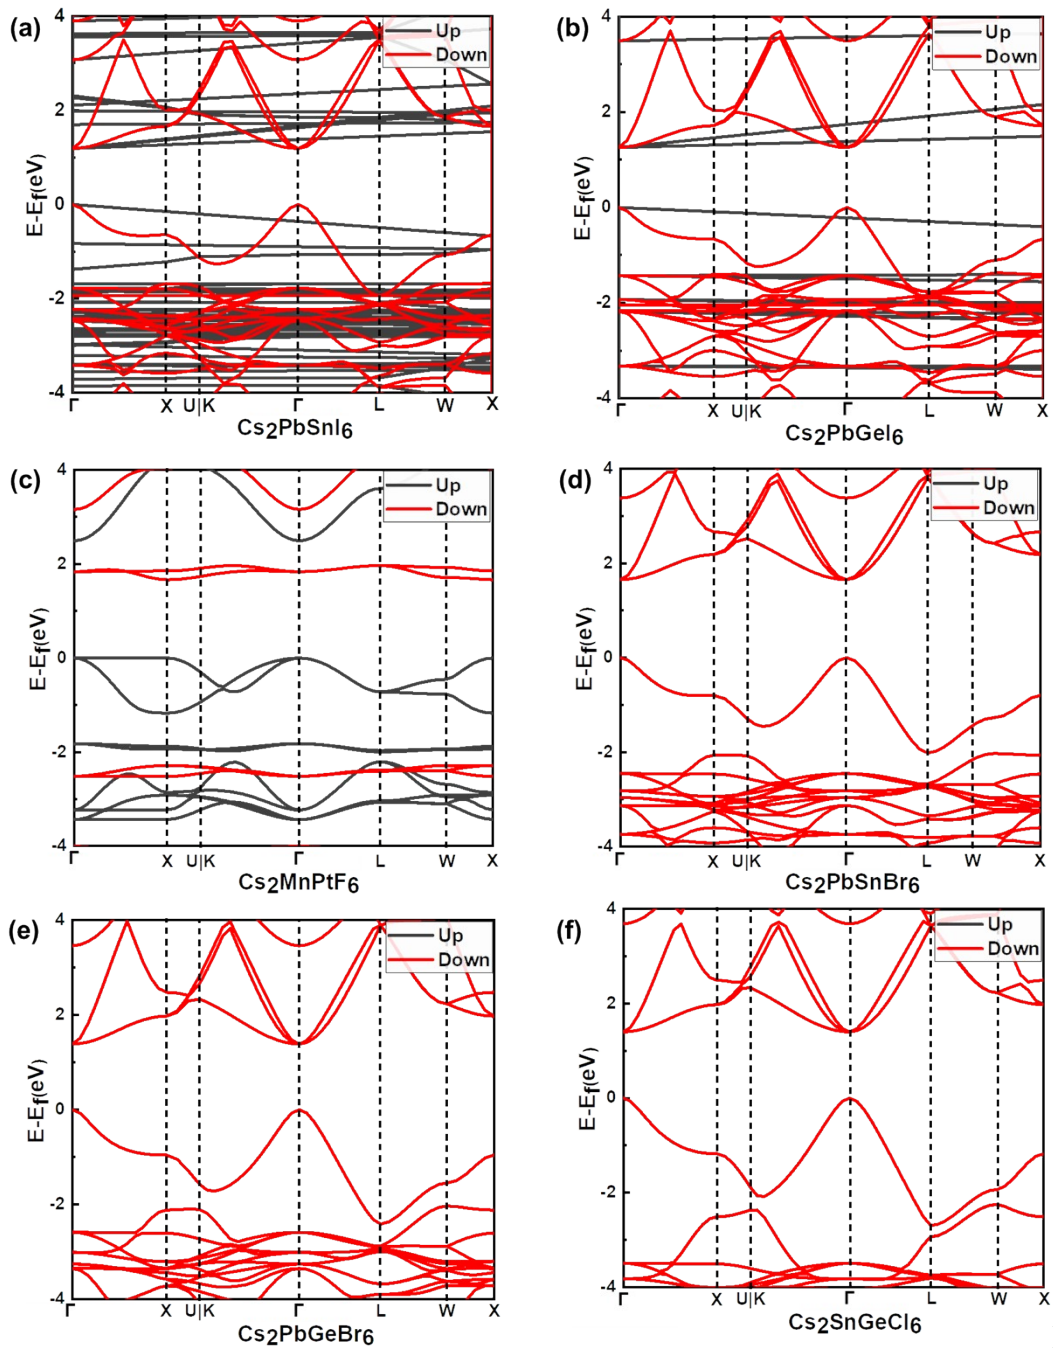

**Fig**

**Figure S3.** HSE calculated band structures for (a)  $\text{Cs}_2\text{PbSnI}_6$ , (b)  $\text{Cs}_2\text{PbGeI}_6$  (c)  $\text{Cs}_2\text{MnPtF}_6$ , (d)  $\text{Cs}_2\text{PbSnBr}_6$ , (e)  $\text{Cs}_2\text{PbGeBr}_6$ , and (f)  $\text{Cs}_2\text{SnGeCl}_6$ .

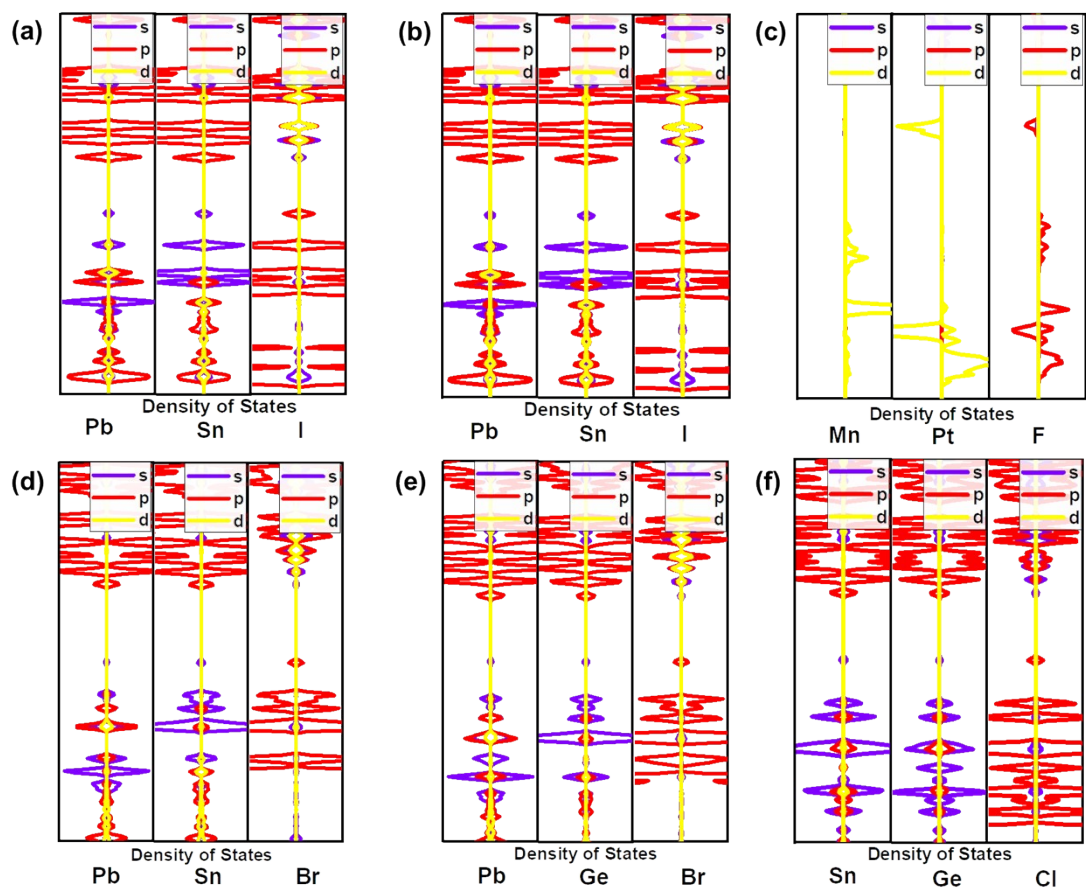

**Figure S4.** HSE calculated projected density of states (PDOS) for (a)  $\text{Cs}_2\text{PbSnI}_6$ , (b)  $\text{Cs}_2\text{PbGeI}_6$  (c)  $\text{Cs}_2\text{MnPtF}_6$ , (d)  $\text{Cs}_2\text{PbSnBr}_6$ , (e)  $\text{Cs}_2\text{PbGeBr}_6$ , and (f)  $\text{Cs}_2\text{SnGeCl}_6$ .

**Table S10.** Band gaps of the 14 predicted all-inorganic double perovskite materials

| Material                            | Predicted bandgap<br>(PBE) | Predicted bandgap<br>(HSE) | Predicted bandgap<br>(HSE+SOC) |
|-------------------------------------|----------------------------|----------------------------|--------------------------------|
| Cs <sub>2</sub> PbSnI <sub>6</sub>  | 0.77                       | 1.19                       | 0.79                           |
| Cs <sub>2</sub> PbGeI <sub>6</sub>  | 0.84                       | 1.26                       | 0.91                           |
| Cs <sub>2</sub> PbGeBr <sub>6</sub> | 0.86                       | 1.38                       | 1.19                           |
| Cs <sub>2</sub> SnGeCl <sub>6</sub> | 0.86                       | 1.40                       | 1.15                           |
| Cs <sub>2</sub> PbSnBr <sub>6</sub> | 1.09                       | 1.65                       | 0.89                           |
| Cs <sub>2</sub> MnPtF <sub>6</sub>  | 0.72                       | 1.67                       | 1.14                           |
| Cs <sub>2</sub> CdTeF <sub>6</sub>  | 1.33                       | 1.88                       | 1.48                           |
| Cs <sub>2</sub> CdBeBr <sub>6</sub> | 0.79                       | 1.92                       | 1.78                           |
| Cs <sub>2</sub> MgMnI <sub>6</sub>  | 1.01                       | 1.97                       | 1.81                           |
| Cs <sub>2</sub> PbSnCl <sub>6</sub> | 1.41                       | 2.05                       | 1.30                           |
| Cs <sub>2</sub> FeTeF <sub>6</sub>  | 0.82                       | 2.15                       | 2.02                           |
| Cs <sub>2</sub> PbGeCl <sub>6</sub> | 1.60                       | 2.28                       | 1.60                           |
| Cs <sub>2</sub> ZnTeF <sub>6</sub>  | 1.68                       | 2.31                       | 1.93                           |
| Cs <sub>2</sub> CaZnI <sub>6</sub>  | 1.37                       | 2.34                       | 2.11                           |

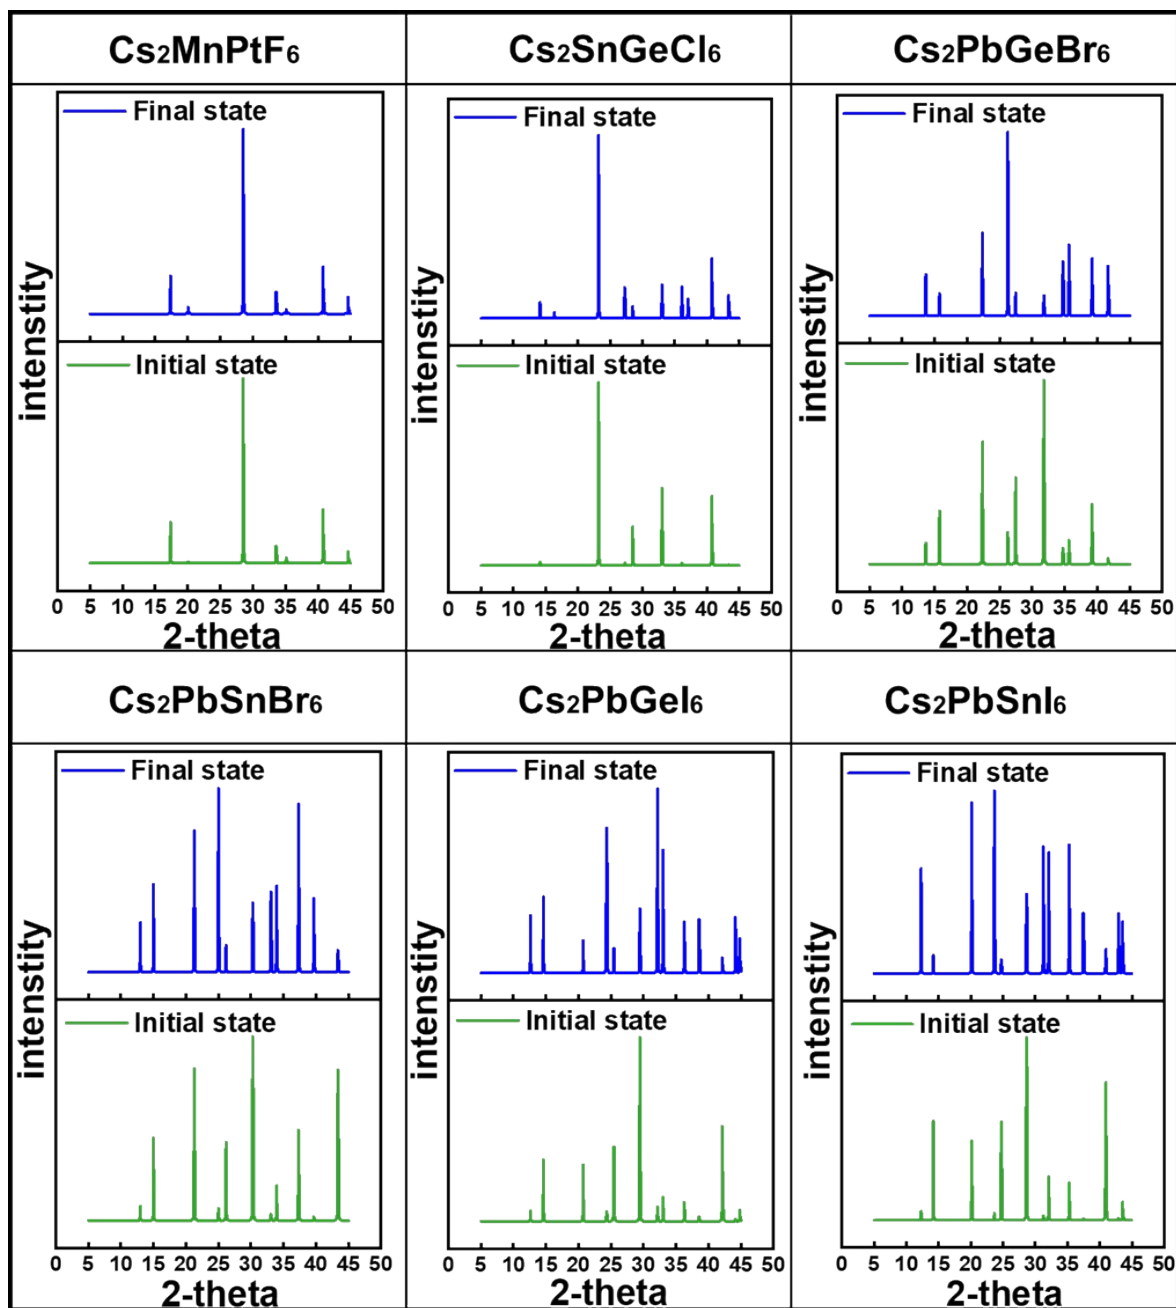

**Figure S5.** The X-ray diffraction evolution of cubic structure with the temperature of 800 K for  $\text{Cs}_2\text{PbSnI}_6$ ,  $\text{Cs}_2\text{PbGeI}_6$ ,  $\text{Cs}_2\text{PbSnBr}_6$ ,  $\text{Cs}_2\text{PbGeBr}_6$ ,  $\text{Cs}_2\text{SnGeCl}_6$ ,  $\text{Cs}_2\text{MnPtF}_6$ .



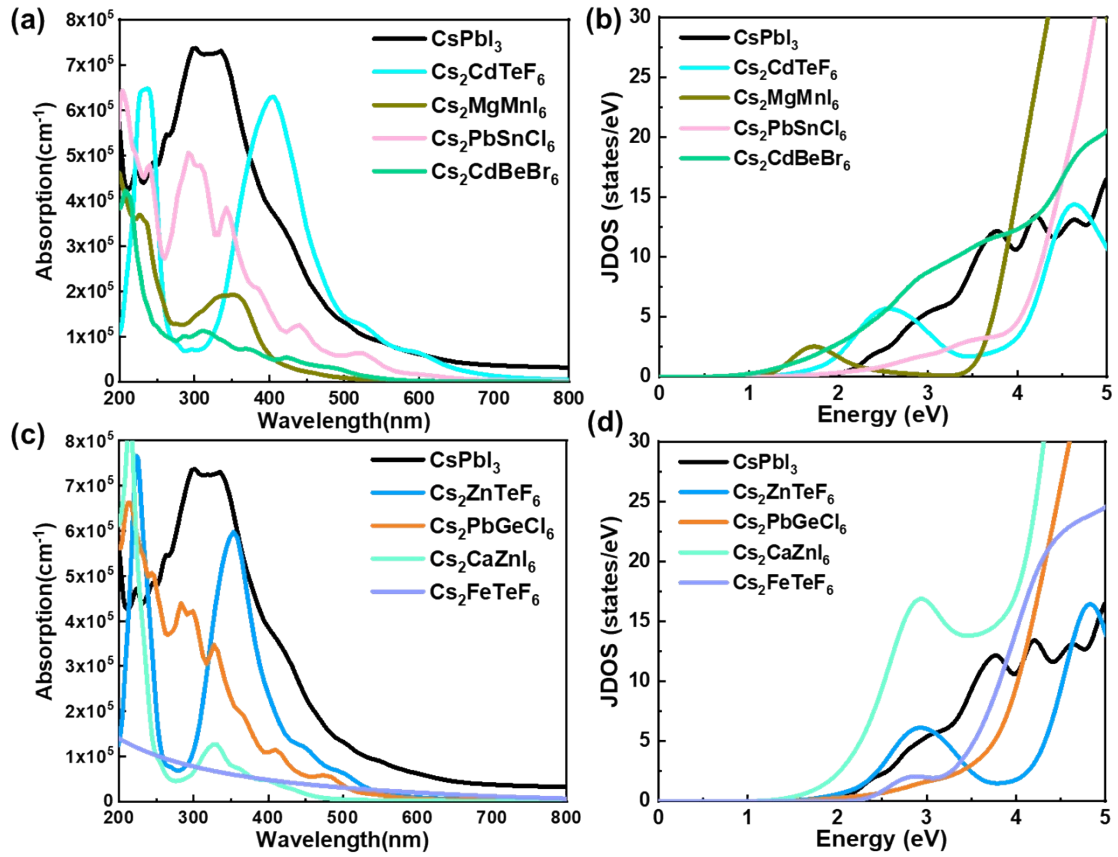

**Figure S6.** Calculated optical properties for Cs<sub>2</sub>CdTeF<sub>6</sub>, Cs<sub>2</sub>MgMnI<sub>6</sub>, Cs<sub>2</sub>PbSnCl<sub>6</sub>, Cs<sub>2</sub>CdBeBr<sub>6</sub>, Cs<sub>2</sub>ZnTeF<sub>6</sub>, Cs<sub>2</sub>PbGeCl<sub>6</sub>, Cs<sub>2</sub>CaZnI<sub>6</sub>, Cs<sub>2</sub>FeTeF<sub>6</sub>. Absorption coefficient: (a) and (c). Joint density of states (JDOS): (b) and (d).
